1 **Exogenous DCPTA ameliorates the soil drought effect on nitrogen metabolism in**  
2 **maize during the pre-female inflorescence emergence stage**

3

4 **Tenglong Xie<sup>1</sup>, Wanrong Gu<sup>1\*</sup>, Liguozhang<sup>2</sup>, Congfeng Li<sup>3</sup>, Wenhua Li<sup>2</sup>, Shi**  
5 **Wei<sup>1\*</sup>**

6 <sup>1</sup> College of Agriculture, Northeast Agricultural University, Harbin 150030, P.R. China;

7 <sup>2</sup> Maize Research Institute, Heilongjiang Academy of Agricultural Sciences, Harbin  
8 150086, P.R. China; <sup>3</sup> Institute of Crop Science, Chinese Academy of Agricultural  
9 Sciences, Beijing 100086, P.R. China.

10

11 E-mail of Tenglong Xie: [tenglongxie@126.com](mailto:tenglongxie@126.com)

12 E-mail of Wanrong Gu: [wanronggu@163.com](mailto:wanronggu@163.com)

13 E-mail of Liguozhang: [zlgny@163.com](mailto:zlgny@163.com)

14 E-mail of Congfeng Li: [lcfaas@163.com](mailto:lcfaas@163.com)

15 E-mail of Wenhua Li: [lwhnky@163.com](mailto:lwhnky@163.com)

16 E-mail of Shi Wei: [weishi5608@126.com](mailto:weishi5608@126.com)

17

18 \*Correspondence:

19 Shi Wei and Wanrong Gu

20 E-mail: [weishi5608@126.com](mailto:weishi5608@126.com) and [wanronggu@163.com](mailto:wanronggu@163.com)

21 Tel.: +86-451-55190472

22

23

24

25 Tables number: 1

26 Figures number: 18, and Fig. 2, Fig. 4 and Fig. 6 should be in colour in print.

27 Word count: 7260

28

29 **Highlights:**

30 This is the first article that explores the effects of DCPTA on nitrogen metabolism and  
31 the first article that explores the effects of DCPTA on crops under soil drought  
32 conditions.

33 **Abstract**

34• 2-(3,4-Dichlorophenoxy) triethylamine (DCPTA) regulates many aspects of plant  
35 development; however, its effects on soil drought tolerance are unknown. We  
36 pre-treated maize (*Zea mays* L.) by foliar application of DCPTA and subsequently  
37 exposed the plants to soil drought and rewatering conditions during the pre-female  
38 inflorescence emergence stage. Exogenous DCPTA significantly alleviated  
39 drought-induced decreases in maize yield, shoot and root relative growth rate (RGR),  
40 leaf relative water content (RLWC), net photosynthetic rate (Pn), stomatal  
41 conductance (Gs) and transpiration rate (Tr), nitrate (NO<sub>3</sub><sup>-</sup>), nitrite (NO<sub>2</sub><sup>-</sup>), and soluble  
42 protein contents, and nitrate reductase (NR), nitrite reductase (NiR), isocitrate  
43 dehydrogenase (ICDH), alanine aminotransferase (AlaAT) and aspartate  
44 aminotransferase (AspAT) activities; increases in the intercellular CO<sub>2</sub> concentration  
45 (Ci), the ammonium (NH<sub>4</sub><sup>+</sup>) and free amino acid contents, and the glutamate  
46 dehydrogenase (GDH) and protease activities. Simultaneously, exogenous DCPTA  
47 improved the spatial and temporal distribution of roots and increased the root  
48 hydraulic conductivity (Lp), flow rate of root-bleeding sap and NO<sub>3</sub><sup>-</sup> delivery rates.  
49 Moreover, Exogenous DCPTA protected the chloroplast structure from drought injury.  
50 Taken together, our results suggest that exogenous DCPTA mitigates the repressive  
51 effects of drought on N metabolism and subsequently enhances drought tolerance  
52 during the pre-female inflorescence emergence stage of maize.

53 **Key words:** DCPTA; maize (*Zea mays* L.); nitrogen metabolism; pre-female  
54 inflorescence emergence stage; soil drought; yield

55

56

## 57 **Introduction**

58 Crops are frequently exposed to drought during the growth period because of  
59 limited and erratic rainfall patterns due to global climate change, which leads to  
60 restrictions on agricultural productivity worldwide (Trenberth *et al.*, 2014). Maize  
61 (*Zea mays* L.), an essential component of global food security, is widely cultivated  
62 around the world. The majority of the cultivated area of maize is almost wholly  
63 rain-fed and experiences sporadic drought and rewetting cycles (Nuccio *et al.*, 2015).  
64 However, maize is considered to be a drought-sensitive crop and loses approximately  
65 1/4 potential yield annually due to drought (Ziyomo and Bernardo, 2013). By 2050,  
66 the world population will reach 9 billion people, resulting in a high demand for maize  
67 (projected to double); furthermore, at that time, drought will severely restrict crop  
68 growth for more than 50% of the cultivated land (Schiermeier, 2014).

69 To stabilize and increase global crop production to satisfy the demand of the  
70 globally burgeoning population, it is imperative to design agronomic research to  
71 improve maize performance under drought stress (Zhao *et al.*, 2018). The application  
72 of plant growth regulators has been considered an effective way to enhance crop  
73 drought resistance (Ali *et al.*, 2017). Multiple investigations have indicated that a  
74 tertiary amine bioregulator known as 2-(3,4-dichlorophenoxy) triethylamine (DCPTA)  
75 regulates many aspects of plant development; for example, DCPTA promotes plant  
76 growth (Keithly *et al.*, 1990a), enlarges chloroplast volume (Keithly *et al.*, 1990b),  
77 enhances photosynthetic enzyme activity (Wan and Mendoza, 1992), accelerates CO<sub>2</sub>  
78 fixation (Gausman *et al.*, 1985), and stimulates carotenoid biosynthesis (Benedict *et*  
79 *al.*, 1985). As far as we know, very few studies of DCPTA have focused on crops, and  
80 the effect of DCPTA on crops exposed to soil drought are still unclear.

81 Nitrogen (N) metabolism is a fundamental process in determining the growth and  
82 productivity of plants (Kusano *et al.*, 2011). After being taken up by root systems,  
83 nitrate (NO<sub>3</sub><sup>-</sup>) is converted to nitrite (NO<sub>2</sub><sup>-</sup>) by nitrate reductase (NR), the first step of  
84 N uptake and utilization. Subsequently, nitrite (NO<sub>2</sub><sup>-</sup>) is converted to NH<sub>4</sub><sup>+</sup> by nitrite  
85 reductase (NiR) with reduction-ferredoxin (Fd<sub>red</sub>) as an electron donor (Rajasekhar *et*

86 *al.*, 2010). Afterward, the ammonium ( $\text{NH}_4^+$ ), derived from  $\text{NO}_3^-$  reduction,  
87 photorespiration and/or other metabolic processes is assimilated into glutamine by the  
88 glutamine synthase/glutamine oxoglutarate aminotransferase (GS/GOGAT) cycle or  
89 the alternative glutamate dehydrogenase (GDH) pathway with 2-oxoglutarate (2-OG)  
90 and reducing equivalents provided by photosynthesis (Chardon *et al.*, 2012).  
91 Subsequently, glutamate serving as a donor of the amino group is used for the  
92 synthesis of other amino acids, which are used for the synthesis of various organic  
93 molecules such as chlorophyll, proteins and nucleic acids. The reactions are catalysed  
94 by aminotransferases such as alanine aminotransferase (AlaAT) and aspartate  
95 aminotransferase (AspAT) (Slattery *et al.*, 2017).

96 Drought disrupts N metabolism mainly via inhibiting the uptake and/or  
97 long-distance transportation of  $\text{NO}_3^-$  (Nacer *et al.*, 2013), altering the activities of  
98 enzymes involved in N metabolism (Robredo *et al.*, 2011), inhibiting amino acid  
99 synthesis, and promoting protein hydrolysis (Fresneau *et al.*, 2007). At present, the  
100 study of plant growth regulators mainly concentrates on the improvement of  
101 photosynthesis and antioxidant systems, and there have been only a limited number of  
102 publications related to N metabolism.

103 Our previous hydroponic trial found that exogenous DCPTA drastically  
104 promoted growth under non-stress conditions and mitigated the PEG-simulated  
105 drought-induced growth inhibition of maize at the seedling stage (Xie *et al.*, 2017).  
106 The present study was conducted to explore whether DCPTA can alleviate soil  
107 drought injuries to maize and whether the effects are associated with the modulation  
108 of nitrogen metabolism.

## 109 **Materials and Methods**

### 110 **Plant material, growth conditions, design and sampling**

111 Seeds of the maize cultivar ZhengDan 958 and DCPTA were obtained from the  
112 Henan Academy of Agricultural Sciences in China and the China Zhengzhou  
113 Zhengshi Chemical Limited Company, respectively.

114 These experiments were performed in 2016 and 2017 at the Experimental Station

115 of Northeast Agricultural University, Harbin (126°73'E, 45°73'N), Heilongjiang  
116 province, China. The research field area has a temperate continental monsoon climate.  
117 The rainfall and mean temperature data during the study period (2016 and 2017,  
118 May–October) are listed in Fig. 1. Pits (inner length, 10 m; width, 7 m; and height, 1.2  
119 m) in the field were used as experiment containers (Fig. 2). Plastic sheets were used to  
120 cover the inner sides of the pits, and a rain-proof shed was used to ensure the crops  
121 were solely dependent on soil moisture and irrigation over the course of the  
122 experiment to maintain the soil water conditions. The soil used was Chernozem and  
123 was sieved (pore size, 1 cm) and diluted with vermiculite (particle diameter, 4-8 mm;  
124 soil to vermiculite, v/v, 2:1). Before planting, soil chemical analysis was conducted  
125 according to Cottenie *et al.* (1982), and the results are presented in Table 1.  
126 Fertilization was carried out by adding ammonium nitrate (33.5% N), calcium  
127 superphosphate (15.5% P<sub>2</sub>O<sub>5</sub>), and potassium sulfate (48% K<sub>2</sub>O) at the rates of 8.0,  
128 8.0 and 20 kg pit<sup>-1</sup>, respectively, before planting. No fertilizer was applied after  
129 planting. All containers were watered to 85% before planting. The seeds were  
130 manually sown on 2nd May 2016 and 4th May 2017 and were harvested on 7th  
131 October 2016 and 3rd October 2017, respectively. Three seeds were sowed per hole to  
132 ensure germination, and only the healthiest seedling within 20 days was kept at each  
133 site. Each container consisted of 10 rows, and the plant-to-plant and row-to-row  
134 distances were 20 cm and 65 cm, respectively. In addition, the ground around the  
135 containers was manually sown with the same plant-to-plant and row-to-row distances.  
136 The control of plant diseases and insect pests was conducted by managers.

137 The maize at the nine-leaf stage (during the pre-female inflorescence emergence  
138 stage) were treated as follows:

139 (1) plants were irrigated continuously and sprayed with either 10 mL water  
140 (well-watered) or DCPTA (well-watered+DCPTA) per plant;

141 (2) irrigation was stopped to form the drought conditions and sprayed with 10  
142 mL of either water (drought) or DCPTA (drought +DCPTA) per plant; plants were  
143 rehydrated after 20 days of drought treatment.

144 The concentrations of DCPTA (25 mg/L) were based on the results of  
145 previous screening experiments, and Tween-20 (0.03%) was added as a surfactant to  
146 the solution for spraying. Each treatment had five replicates, and experiments were  
147 performed in a completely randomized design. The dynamic changes in soil water  
148 contents during the experimental stage are exhibited in Fig. 3.

149 Random plants from each treatment were sampled on days 0, 5, 10, 15, 20, 25  
150 and 30. For leaf sampling, the middle part of the 9<sup>th</sup> leaf (numbered basipetally) was  
151 sampled for analysis of leaf gas exchange, and the same part of the leaf was stored at  
152 -80°C after immersion in liquid nitrogen for 30 min for determination of physiological  
153 parameters. For root sampling, a hand-held soil auger (inner diameter of 20 cm) was  
154 used to obtain soil cores from 0 to 100 cm depth of the soil profile at 10 cm increments.  
155 The soil cores were soaked in a plastic container overnight, and roots were stirred and  
156 sieved through a mesh (400 holes cm<sup>-2</sup>). The soil cores were carefully washed by  
157 swirling water through the cores. The soil material and old dead roots debris were  
158 manually separated from the live roots.

## 159 **Plant measurement and analysis**

### 160 **Relative growth rate (RGR) and plant productivity**

161 The shoots and roots of maize were oven dried at 105°C for 45 min and then  
162 held at 80°C for 48 h; the shoot and root dry weights plant<sup>-1</sup> were determined soon  
163 afterwards. The RGR was determined as follows:  $RGR \text{ (fresh weight)} = [\ln(\text{final dry weight}) - \ln(\text{initial dry weight})] / (\text{duration of treatment days})$  (Kingsbury *et al.*, 1984).  
164 A leaf area metre (Li-COR 3100; Li-COR, Lincoln, NE, USA) was used to estimate  
165 the leaf area; number of grains plant<sup>-1</sup> (GN) and grain yield plant<sup>-1</sup> (GY) were  
166 recorded at the maize physiological maturity stage.  
167

### 168 **Leaf relative water content of (RLWC) and soil water content (SWC)**

169 The RLWC was determined on fresh leaf disks (2×2 cm) from the middle part of

170 the 8th leaves (numbered basipetally). After they were weighed (FW), the disks were  
171 immersed in distilled water at 25 °C overnight to obtain the turgid weight (TW). The  
172 leaves were dried at 80°C for 48 h and then weighed a third time (DW). RLWC was  
173 calculated as follows:

$$174 \quad \text{RLWC (\%)} = [(FW - DW) / (TW - DW)] \times 100.$$

175 SWC was determined in the soil from the internal area of each container. After  
176 being weighed (FW), the soil portion was dried at 85°C for 96 h and then weighed  
177 (DW). SWC was calculated as follows:

$$178 \quad \text{SWC (\%)} = [(FW - DW) / DW] \times 100.$$

### 179 **Gas exchange**

180 The photosynthetic rate (Pn), transpiration rate (Tr), stomatal conductance (Gs),  
181 and intercellular CO<sub>2</sub> concentration (Ci) values were determined with a portable  
182 photosynthesis system (LI-6400XT; LI-COR Biosciences, Lincoln, NE, USA)  
183 between at 13:00~14:00 h. The 6-cm<sup>2</sup> leaf chamber was used, and the photo flux  
184 density was 1000  $\mu\text{mol m}^{-2}\text{s}^{-1}$ .

### 185 **Transmission electron microscopy of chloroplasts**

186 Observations were performed according to the description of Hu *et al.* (2014), and  
187 the chloroplast ultrastructure was observed under a H-7650 transmission electron  
188 microscope (manufacture: Hitachi, Japan).

### 189 **Root morphological traits, root hydraulic conductivity, and the collection of** 190 **root-bleeding sap**

191 Roots from each soil core were scanned using a digital scanner (Epson V700,  
192 Indonesia). The root images were analysed using the WinRHIZO Image Analysis  
193 system (Version 2013e) (Regent Instruments Inc., Canada). The root length density  
194 (RLD, cm root cm<sup>-3</sup> soil) and root square area density (RSD, cm<sup>2</sup> root cm<sup>-3</sup> soil) were  
195 calculated according to the method described by Mosaddeghi *et al.* (2009).

196 The hydrostatic root hydraulic conductivity ( $L_p$ ) was measured with a  
197 Scholander pressure chamber according to the method described by López-Pérez *et al.*  
198 (2007).

199 The plants were cut by scissors at 10–12 cm above the soil surface at 18:00-19:00.  
200 Centrifuge tubes (inner diameter 40 mm) with cotton were placed on the upper end of  
201 the stalks, and the stalk joints and centrifuge tubes were wrapped by plastic film to  
202 keep impurities and insects out (Fig. 4). The bleeding sap was collected for 12 h; then,  
203 the cotton was extracted from each centrifuge tube and placed into a glass syringe  
204 (100 ml), and the root-bleeding sap was squeezed out for volume measurement. The  
205  $\text{NO}_3^-$  content in the root-bleeding sap was determined by AA3 Continuous Flow  
206 Analytical System (Seal, Germany) according to Guan *et al.* (2014). The flow rate of  
207 the root-bleeding sap and the  $\text{NO}_3^-$  delivery rate were expressed as  $\text{ml h}^{-1} \text{root}^{-1}$  and  
208  $\mu\text{g h}^{-1} \text{root}^{-1}$ , respectively.

#### 209 **Foliar $\text{NO}_3^-$ , $\text{NO}_2^-$ and $\text{NH}_4^+$ contents**

210 The foliar  $\text{NO}_3^-$  content determination by the reduction of  $\text{NO}_3^-$  to  $\text{NO}_2^-$  followed  
211 the salicylic acid methods of Cataldo *et al.* (1975), the absorbance was monitored at  
212 410 nm. The foliar  $\text{NO}_2^-$  content was determined using the method described by Barro  
213 *et al.* (1991). The  $\text{NO}_2^-$  content was calculated according to the standard curve  
214 obtained by known concentrations of  $\text{KNO}_3$ . The  $\text{NH}_4^+$  content was determined by  
215 measuring the absorbance changes at 620 nm, as described by Weber (2007). The  
216  $\text{NH}_4^+$  content was calculated according to the standard curve obtained by known  
217 concentrations of  $(\text{NH}_4)_2\text{SO}_4$ .

#### 218 **Enzyme activities involved in nitrogen metabolism**

219 The activities of foliar NR and NiR were measured based on the conversion of  
220  $\text{NO}_3^-$  to  $\text{NO}_2^-$  and  $\text{NO}_3^-$  to  $\text{NH}_4^+$ , following the methods of Barro *et al.* (1991), and Ida  
221 and Morita (1973), respectively. One NR and NiR unit was expressed as the enzyme  
222 amount required for the conversion of 1 mmol of  $\text{NO}_3^-$  to  $\text{NO}_2^-$  per hour and the



223 enzyme amount required for the conversion of 1 mmol of  $\text{NO}_3^-$  to  $\text{NH}_4^+$   $\text{min}^{-1}$ ,  
224 respectively. GS activity was measured according to the methods of O'Neal and Joy  
225 (1973). One unit of GS was expressed as the enzyme amount required to catalyse the  
226 formation of 1 mmol of glutamylmonohydroxamate per min. The results were  
227 expressed as  $\mu\text{mol}$  NADH used per minute per milligram of Pro. The GOGAT activity  
228 was measured based on the conversion of 2-ketoglutarate to glutamate, following the  
229 methods of Groat and Vance (1981). One unit of GOGAT was expressed as the  
230 number of enzymes catalysing the oxidation of 1 mmol of NADH per min. The  
231 deaminating GDH activity (NAD-GDH) and aminating GDH activity (NADH-GDH)  
232 were determined by recording the reduction of NAD and the oxidation of NADH,  
233 respectively, as described by Groat and Vance (1981). One unit of GDH was  
234 calculated in units of mmol of NADH oxidized/NAD reduced per minute. Isocitrate  
235 dehydrogenase (ICDH) was assayed according to the method of Lòpez-Millàn *et al.*  
236 (2000). The activity was expressed as U per minute per milligram of protein.

### 237 **Activity of AlaAT and AspAT**

238 The AlaAT and AspAT activities were determined according to the methods of  
239 Jia *et al.* (2015). Enzyme activity was expressed as  $\mu\text{mol g}^{-1}\text{min}^{-1}$ .

### 240 **Contents of free amino acids and soluble proteins and protease activity**

241 The free amino acid contents were assayed with the ninhydrin reagent method  
242 according to Yemm and Cocking (1955), followed by absorbance readings at 570 nm  
243 using glycine as the standard. The soluble protein contents were determined using the  
244 Coomassie Brilliant Blue G-250 reagent following the description of Bradford (1976),  
245 followed by absorbance readings at 595 nm using bovine serum albumin as the  
246 standard. Protease activity was determined by the casein digestion assay described by  
247 Drapeau (1974). By this method, one unit is the number of enzymes required to  
248 release acid-soluble fragments equivalent to 0.001 A280 per minute at 37°C and pH  
249 7.8.

## 250 **Statistical analysis**

251 The data were analysed using SPSS 17.0 and all the values are presented as the mean  
252  $\pm$  SE. The means were separated using the least significant difference (LSD) test at  
253 the 5% probability level.

## 254 **Results**

### 255 **Yield**

256 Drought stress significantly inhibited the maize yield (Fig. 5). Compared with  
257 the well-watered treatment, in the drought treatment, the grain number decreased by  
258 29.23% in 2016 and 33.24% in 2017, and the grain yield decreased by 34.06% in  
259 2016 and by 38.22% in 2017. However, the decrease in maize yield was partially  
260 recovered by DCPTA. Compared with the well-watered treatment, in the  
261 drought+DCPTA treatment, the grain number decreased by 14.01% in 2016 and by  
262 16.55% in 2017, and the grain yield decreased by 17.98% in 2016 and by 20.54% in  
263 2017. Moreover, the application of DCPTA improved maize yield under well-watered  
264 conditions. Compared with the well-watered treatment, in the DCPTA treatment, the  
265 grain number increased by 5.97% in 2016 and by 6.50% in 2017, and the grain yield  
266 increased by 7.31% in 2016 and by 8.02% in 2017.

### 267 **Relative growth rate (RGR) of shoot and root**

268 The shoot growth rate was inhibited during the drought period, the root growth  
269 rate was promoted over days 0-10 and subsequently decreased, and the growth rates  
270 of shoots and roots recovered during rehydration (Fig. 6 and 7). In the drought  
271 treatment compared with the control in 2016, the RGR of shoots and roots decreased  
272 by 52.26% and by 48.59%, respectively, between day 15 and 20 and by 39.76% and  
273 37.70%, respectively, between day 25 and 30 in 2016. In the drought treatment  
274 compared with the control in 2017, the RGR of shoots and roots decreased by 65.18%  
275 and 66.52%, respectively, between day 15 and 20 and by 51.97% and 43.74%,  
276 respectively, between day 25 and 30 in 2017. However, the decrease in growth was

277 partially recovered by DCPTA. In the drought+DCPTA treatment compared with the  
278 control in 2016, the RGR of shoots and roots decreased by 29.96% and 26.31%,  
279 respectively, between day 15 and 20, and by 10.11% and 11.49%, respectively,  
280 between day 25 and 30. In the drought+DCPTA treatment compared with the control  
281 in 2017, the RGR of shoots and roots decreased by 34.20% and 42.23%, respectively,  
282 between day 15 and 20, and by 12.41% and 14.75%, respectively, between day 25 and  
283 30. Moreover, the application of DCPTA improved maize growth under well-watered  
284 conditions. The shoot RGR difference between the well-watered+DCPTA treatment  
285 and well-watered treatment was significant at days 16-20 and 26-30 in 2016 and days  
286 11-30 in 2017, respectively. Similarly, the root RGR difference between the DCPTA  
287 treatment and well-watered treatment was significant at days 6-10 and 16-25 in 2016  
288 and days 11-30 in 2017, respectively.

#### 289 **Root length density (RLD) and root surface area density (RSD)**

290 Drought dramatically inhibited RLD and RSD in the 0–60 cm soil profile in  
291 2016 and 2017 (Fig. 8). At day 20, there was a significant difference in RLD for the  
292 drought treatment and drought+DCPTA treatment in 20–40 cm in 2016 and in 20–50  
293 cm in 2017, respectively. On day 30, the RLD declines were partially reversed by  
294 rehydration. On day 30, there was a significant difference in RLD for the drought  
295 treatment and drought+DCPTA treatment in 0–50 cm in both 2016 and 2017. On day  
296 30, there was a significant ( $P > 0.05$ ) difference in RLD for the well-watered  
297 treatment and well-watered+DCPTA treatment in 0–20 cm in both 2016 and 2017. On  
298 day 20, there was a significant difference in RLD between the drought treatment and  
299 drought+DCPTA treatment in 10–40 cm in 2016 and 10–50 cm in 2017. On day 30,  
300 the declines in RLD were partially reversed by rehydration. At day 30, there was a  
301 significant ( $P > 0.05$ ) difference in RLD between the drought treatment and  
302 drought+DCPTA treatment in 0–40 cm in 2016 and 0–50 cm in 2017. On day 30,  
303 there was a significant difference between RLD for the well-watered treatment and  
304 well-watered+DCPTA treatment in 0–20 cm in 2016 and in 0–30 cm in 2017.

305 **Root hydraulic conductivity, flow rate of root-bleeding sap and NO<sub>3</sub><sup>-</sup> delivery**  
306 **rates**

307 The root hydraulic conductivity, flow rate of root-bleeding sap and NO<sub>3</sub><sup>-</sup>  
308 concentrations in the root-bleeding sap declined continuously during the drought  
309 period and recovered during rehydration (Fig. 9). In the drought treatment compared  
310 with the control, the root hydraulic conductivity, flow rate of root-bleeding sap and  
311 NO<sub>3</sub><sup>-</sup> delivery rates decreased by 34.21%, 75.69% and 76.58%, respectively, on day  
312 20 and by 19.34%, 35.96% and 57.37%, respectively, on day 30 in 2016; these values  
313 decreased by 47.01%, 78.80% and 61.34%, respectively, on day 20 and by 29.03%,  
314 33.79%, and 50.47%, respectively, on day 30 in 2017. However, the DCPTA  
315 application partially reversed the decline in root hydraulic conductivity, root-bleeding  
316 sap flow and NO<sub>3</sub><sup>-</sup> delivery rates caused by drought and resulted in a faster recovery  
317 after rehydration. In the drought+DCPTA treatment compared with the control, the  
318 root hydraulic conductivity, root-bleeding sap flow and NO<sub>3</sub><sup>-</sup> delivery rates decreased  
319 by 17.91%, 46.73% and 41.90%, respectively, on day 20 and by 9.87%, 18.80% and  
320 23.51%, respectively, on day 30 in 2016; these values decreased by 26.60%, 47.66%  
321 and 37.06%, respectively, on day 20 and by 16.94%, 14.68% and 25.23%,  
322 respectively, on day 30.

323 Under well-watered conditions, DCPTA significantly increased root hydraulic  
324 conductivity on the 15<sup>th</sup>, 20<sup>th</sup>, 25<sup>th</sup> and 30<sup>th</sup> days in 2016 and on the 20<sup>th</sup> and 25<sup>th</sup> days  
325 in 2017; DCPTA significantly increased the flow rate of root-bleeding sap on the 10<sup>th</sup>,  
326 15<sup>th</sup>, 20<sup>th</sup> and 25<sup>th</sup> days in both 2016 and 2017; DCPTA significantly increased the  
327 NO<sub>3</sub><sup>-</sup> concentration in root-bleeding sap on the 10<sup>th</sup>, 15<sup>th</sup>, 20<sup>th</sup>, 25<sup>th</sup> and 30<sup>th</sup> days in  
328 2016 and on the 10<sup>th</sup>, 15<sup>th</sup>, 20<sup>th</sup> and 25<sup>th</sup> days in 2017.

329 **Leaf water status (RLWC)**

330 The RLWC declined continuously over the drought period and recovered  
331 during rehydration (Fig. 10). In the drought treatment compared with the control,  
332 RLWC decreased by 30.88% on day 20 and by 13.08% on day 30 in 2016 and

333 decreased by 37.48% on day 20 and by 21.89% on day 30 in 2017. However, the  
334 DCPTA application partially reversed the decline in RLWC caused by drought and  
335 resulted in a faster recovery of the foliar RLWC contents after rehydration. In the  
336 drought+DCPTA treatment compared with the control, the RLWC decreased by 11.75%  
337 on day 20 and by 3.84% on day 30 in 2016 and decreased by 21.15% on day 20 and  
338 by 10.73% on day 30 in 2017. Under well-watered conditions, DCPTA application  
339 had no significant effect on the RLWC.

#### 340 **Gas exchange parameters**

341 Pn, Gs and Tr declined continuously over the drought period and recovered  
342 during rehydration (Fig. 11). In the drought treatment compared with the control, Pn,  
343 Gs and Tr decreased by 46.20%, 68.97% and 51.35%, respectively, on day 20 and by  
344 35.06%, 46.30% and 38.17%, respectively, on day 30 in 2016 and decreased by  
345 56.00%, 71.10% and 62.10%, respectively, on day 20 and by 45.89%, 44.02% and  
346 43.79%, respectively, on day 30 in 2017. However, the DCPTA application partially  
347 reversed the decline in Pn, Gs and Tr caused by drought and resulted in a faster  
348 recovery of Pn, Gs and Tr rehydration. In the drought+DCPTA treatment compared  
349 with the control, Pn, Gs and Tr decreased by 23.41%, 37.39% and 20.95%,  
350 respectively, on day 20 and by 8.77%, 20.89% and 10.61%, respectively, on day 30 in  
351 2016 and decreased by 35.31%, 32.03% and 34.11%, respectively, on day 20 and by  
352 14.16%, 15.33% and 8.62%, respectively, on day 30. Under well-watered conditions,  
353 DCPTA significantly increased Pn on the 10<sup>th</sup>, 15<sup>th</sup>, 25<sup>th</sup> and 30<sup>th</sup> days in 2016 and on  
354 the 15<sup>th</sup>, 20<sup>th</sup> and 25<sup>th</sup> days in 2017. In addition, under well-watered conditions,  
355 DCPTA significantly increased Gs on the 15<sup>th</sup>, 20<sup>th</sup>, 25<sup>th</sup> and 30<sup>th</sup> days in 2016 and on  
356 the 10<sup>th</sup>, 15<sup>th</sup>, 20<sup>th</sup>, 25<sup>th</sup> and 30<sup>th</sup> days in 2017 and significantly increased Tr on the 10<sup>th</sup>,  
357 15<sup>th</sup>, 20<sup>th</sup>, 25<sup>th</sup> and 30<sup>th</sup> days in both 2016 and 2017.

358 In 2016 and 2017, Ci showed the same variation tendency during the drought  
359 period. In the drought treatment, Ci declined over days 0-10, subsequently increased  
360 over days 10-20, and then decreased after rehydration. In the drought+DCPTA

361 treatment, Ci declined over days 0-15 day and subsequently increased over days  
362 15-30. Under well-watered conditions, DCPTA application had no significant effect  
363 on Ci.

### 364 **Chloroplast ultrastructure**

365       Regardless of whether DCPTA was applied, the photosynthetic mesophyll cells  
366 of the non-stressed seedlings included a delimited cell wall containing chloroplasts.  
367 These chloroplasts had intact membranes and a regular arrangement of granal and  
368 stromal thylakoids, which were attached to the cell wall and exhibited typical  
369 ellipsoidal shapes (Fig. 12). However, in the stressed seedlings, the cell wall structure  
370 was incomplete and exhibited indistinct gradation, a lower density, and loose edges.  
371 Plasmolysis and degradation were also evident in part of the cell membrane.  
372 Moreover, the chloroplasts, which separated from the plasma membrane, were nearly  
373 round and swelled asymmetrically, the thylakoids were overly disorganized, and the  
374 thylakoid membranes were loose and showed an increased number of plastoglobules.  
375 In the PEG-6000+DCPTA treatment, the complete membrane structures of the  
376 chloroplasts were present, and the shapes of the chloroplasts changed slightly from  
377 elongated ellipses to ellipses close to the cell walls. A well-aligned internal lamellar  
378 system and fewer plastoglobules were observed in the leaves of the  
379 PEG-6000+DCPTA treatment compared with the leaves of the PEG-6000 treatment.

### 380 **ICDH activity**

381       ICDH activity declined continuously over the drought period and recovered  
382 during rehydration (Fig. 13). In the drought treatment compared with the control,  
383 ICDH activity decreased by 40.75% on day 20 and by 36.33% on day 30 in 2016 and  
384 decreased by 37.77% on day 20 and by 33.07% on day 30 in 2017. However, the  
385 DCPTA application partially reversed the decline in ICDH activity caused by drought  
386 and resulted in a faster recovery of ICDH activity after rehydration. In the  
387 drought+DCPTA treatment compared with the control, ICDH decreased by 24.92% on

388 day 20 and by 19.94% on day 30 in 2016 and decreased by 19.88% on day 20 and by  
389 13.63% on day 30 in 2017. Under well-watered conditions, the application of DCPTA  
390 significantly increased the foliar ICDH activity on the 10<sup>th</sup>, 15<sup>th</sup>, 20<sup>th</sup> and 25<sup>th</sup> days in  
391 2016 and on the 15<sup>th</sup>, 20<sup>th</sup>, and 25<sup>th</sup> days in 2017.

#### 392 **Contents of NO<sub>3</sub><sup>-</sup>, NO<sub>2</sub><sup>-</sup> and NH<sub>4</sub><sup>+</sup>**

393 The foliar NO<sub>3</sub><sup>-</sup> and NO<sub>2</sub><sup>-</sup> contents declined continuously during the drought  
394 period and recovered during rehydration (Fig. 14). In the drought treatment compared  
395 with the control, the foliar NO<sub>3</sub><sup>-</sup> and NO<sub>2</sub><sup>-</sup> contents decreased by 39.82% and 38.27%,  
396 respectively, on day 20 and by 33.62% and 35.11%, respectively, on day 30 in 2016  
397 and decreased by 57.97% and 32.27%, respectively, on day 20 and by 42.38% and  
398 25.21%, respectively, on day 30 in 2017. However, the DCPTA application partially  
399 reversed the decline in the foliar NO<sub>3</sub><sup>-</sup> and NO<sub>2</sub><sup>-</sup> contents caused by drought and  
400 resulted in a faster recovery of the foliar NO<sub>3</sub><sup>-</sup> and NO<sub>2</sub><sup>-</sup> contents after rehydration. In  
401 the drought+DCPTA treatment compared with the control, the foliar NO<sub>3</sub><sup>-</sup> and NO<sub>2</sub><sup>-</sup>  
402 contents decreased by 25.94% and 23.31%, respectively, on day 20 and by 14.25%  
403 and 18.55%, respectively, on day 30 in 2016 and decreased by 33.86% and 18.26%,  
404 respectively, on day 20 and by 17.26% and 8.60%, respectively, on day 30 in 2017. In  
405 contrast, drought led to a marked elevation in the foliar NH<sub>4</sub><sup>+</sup> content. In the drought  
406 treatment compared with the control, the foliar NH<sub>4</sub><sup>+</sup> increased by 52.48% on day 20  
407 and by 29.18% on day 30 in 2016 and increased by 98.68% on day 20 and by 72.21%  
408 on day 30 in 2017. In contrast, the DCPTA application suppressed the increase in the  
409 foliar NH<sub>4</sub><sup>+</sup> content induced by drought. In the drought+DCPTA treatment compared  
410 with the control, the foliar NH<sub>4</sub><sup>+</sup> increased by 20.83% on day 20 and by 13.33% on  
411 day 30 in 2016 and increased by 45.37% on day 20 and by 33.29% on day 30 in 2017.

412 Under well-watered conditions, DCPTA significantly increased the foliar NO<sub>3</sub><sup>-</sup>  
413 content on the 20<sup>th</sup> and 25<sup>th</sup> days in 2016 and on the 15<sup>th</sup>, 20<sup>th</sup>, 25<sup>th</sup> and 30<sup>th</sup> days in  
414 2017. However, the DCPTA application had no significant effect on the foliar  
415 contents of NO<sub>2</sub><sup>-</sup> and NH<sub>4</sub><sup>+</sup>.

#### 416 **Activities of NR and NiR**

417           The activities of foliar NR and NiR declined continuously during the drought  
418 period and recovered during rehydration (Fig. 15). In the drought treatment compared  
419 with the control treatment, the activities of foliar NR and NiR decreased by 40.37%  
420 and 36.91%, respectively, on day 20 and by 34.42% and 29.82%, respectively, on day  
421 30 in 2016 and decreased by 52.80% and 32.46%, respectively, on day 20 and by  
422 37.36% and 21.28%, respectively, on day 30 in 2017. However, the DCPTA  
423 application partially reversed the declines in the activities of foliar NR and NiR  
424 caused by drought and resulted in a faster recovery of the foliar NR and NiR activities  
425 after rehydration. In the drought+DCPTA treatment compared with the control, the  
426 activities of foliar NR and NiR decreased by 15.54% and 14.21%, respectively, on  
427 day 20 and by 10.79% and 7.79%, respectively, on day 30 in 2016 and decreased by  
428 25.10% and 12.39%, respectively, on day 20 and by 13.55% and 4.96%, respectively,  
429 on day 30 in 2017. Under well-watered conditions, DCPTA significantly increased  
430 the foliar NR activity on the 10<sup>th</sup>, 15<sup>th</sup> and 25<sup>th</sup> days in 2016 and on the 10<sup>th</sup>, 15<sup>th</sup>, 20<sup>th</sup>  
431 and 25<sup>th</sup> days in 2017. Similarly, under well-watered conditions, DCPTA significantly  
432 increased the foliar NiR activity on the 10<sup>th</sup> and 25<sup>th</sup> days in 2016 and on the 15<sup>th</sup> and  
433 20<sup>th</sup> days in 2017.

#### 434 **Activities of GS, GOGAT and GDH**

435           The activities of foliar GS and GOGAT first increased and then decreased  
436 during the drought period and recovered during rehydration (Fig. 16). In the drought  
437 treatment compared with the control, the activities of foliar GS and GOGAT  
438 decreased by 40.69% and 60.62%, respectively, on day 20 and by 33.65% and 51.39%,  
439 respectively, on day 30 in 2016 and decreased by 47.57% and 66.84%, respectively,  
440 on day 20 and by 37.96% and 56.77%, respectively, on day 30 in 2017. However, the  
441 DCPTA application partially reversed the decline in the foliar GS and GOGAT  
442 activities caused by drought and resulted in a faster recovery of the foliar GS and  
443 GOGAT activities after rehydration. In the drought+DCPTA treatment compared with



444 the control, the foliar GS and GOGAT activities decreased by 19.87% and 33.37%,  
445 respectively, on day 20 and by 10.99% and 15.17%, respectively, on day 30 in 2016  
446 and decreased by 23.56% and 33.02%, respectively, on day 20 and by 14.93% and  
447 18.20%, respectively, on day 30 in 2017. Likewise, the DCPTA application alone  
448 caused an increase in the foliar GS and GOGAT activities. In contrast, drought led to  
449 marked increases in the activities of foliar NAD-GDH and NADH-GDH. In the  
450 drought treatment compared with the control, the activities of foliar NAD-GDH and  
451 NADH-GDH increased by 87.16% and 150.92%, respectively, on day 20 and by  
452 84.01% and 134.71%, respectively, on day 30 in 2016 and increased by 103.99% and  
453 137.36%, respectively, on day 20 and by 96.13% and 111.20%, respectively, on day  
454 30 in 2017. However, the DCPTA application partially reversed the increases in the  
455 activities of foliar NAD-GDH and NADH-GDH caused by drought and resulted in a  
456 faster recovery of the foliar NAD-GDH and NADH-GDH activities after rehydration.  
457 In the drought+DCPTA treatment compared with the control, the activities of foliar  
458 NAD-GDH and NADH-GDH increased by 49.55% and 92.59%, respectively, on day  
459 20 and by 36.52% and 49.51%, respectively, on day 30 in 2016 and increased by  
460 46.90% and 80.94%, respectively, on day 20 and by 35.43% and 45.60%, respectively,  
461 on day 30 in 2017.

462 Under well-watered conditions, DCPTA significantly increased the foliar GS  
463 activity on the 20<sup>th</sup> and 25<sup>th</sup> days in 2016 and on the 10<sup>th</sup> 20<sup>th</sup> and 25<sup>th</sup> days in 2017.  
464 Similarly, under well-watered conditions, DCPTA significantly increased the foliar  
465 GOGAT activity on day 15 in 2017 and significantly increased the foliar NAD-GDH  
466 activity on day 15 in 2016

#### 467 **Activities of AlaAT and AspAT**

468 The activities of foliar AlaAT and AspAT first increased and then continuously  
469 decreased during the drought period and recovered during rehydration (Fig. 17). In the  
470 drought treatment compared with the control, the activities of foliar AlaAT and AspAT  
471 decreased by 44.18% and 65.51%, respectively, on day 20 and by 36.43% and 38.52%,

472 respectively, on day 30 in 2016 and decreased by 56.80% and 54.92%, respectively,  
473 on day 20 and by 41.43% and 41.29%, respectively, on day 30 in 2017. However, the  
474 DCPTA application partially reversed the decline in the activities of foliar AlaAT and  
475 AspAT caused by drought and resulted in a faster recovery of the foliar AlaAT and  
476 AspAT activities after rehydration. In the drought+DCPTA treatment compared with  
477 the control, the activities of foliar AlaAT and AspAT decreased by 17.45% and  
478 35.39%, respectively, on day 20 and by 15.84% and 17.17%, respectively, on day 30  
479 in 2016 and decreased by 32.49% and 37.82%, respectively, on day 20 and by 17.46%  
480 and 18.21%, respectively, on day 30 in 2017.

481 Under well-watered conditions, DCPTA significantly increased the foliar  
482 AlaAT activity on the 10<sup>th</sup>, 15<sup>th</sup>, and 20<sup>th</sup> days in 2016 and on the 10<sup>th</sup>, 15<sup>th</sup>, 20<sup>th</sup> and  
483 25<sup>th</sup> days in 2017. Similarly, under well-watered conditions, DCPTA significantly  
484 increased the foliar AspAT activity on day 15 in 2016 and on the 5<sup>th</sup>, 10<sup>th</sup>, 15<sup>th</sup> and 25<sup>th</sup>  
485 days in 2017.

#### 486 **Protease activity and contents of proteins and free amino acids**

487 The protease activity and free amino acid contents increased continuously  
488 during the drought period and decreased during rehydration (Fig. 18). In the drought  
489 treatment compared with the control, the protease activity and free amino acid  
490 contents increased by 122.48% and 88.92%, respectively, on day 20 and by 55.03%  
491 and 34.51%, respectively, on day 30 in 2016 and increased by 145.15% and 78.58%,  
492 respectively, on day 20 and by 57.08% and 43.29%, respectively, on day 30 in 2017.  
493 However, the DCPTA application partially reversed the increases in the protease  
494 activity and free amino acid contents caused by drought.

495 In the drought+DCPTA treatment compared with the control, the protease  
496 activity and free amino acid contents increased by 78.47% and 24.77%, respectively,  
497 on day 20 and by 16.46% and 6.62%, respectively, on day 30 in 2016 and increased  
498 by 65.41% and 30.24%, respectively, on day 20 and 14.50% and 13.57%, respectively,  
499 on day 30 in 2017.

500 In contrast, drought led to a marked decrease in the foliar protein content. In the  
501 drought treatment compared with the control, the foliar protein content decreased by  
502 35.51% on day 20 and by 18.32% on day 30 in 2016 and decreased by 44.81% on day  
503 20 and by 22.50% on day 30 in 2017. In contrast, the DCPTA application suppressed  
504 the increase in the foliar protein content induced by drought. In the drought+DCPTA  
505 treatment compared with the control, the foliar protein content increased by 19.54%  
506 on day 20 and by 7.25% on day 30 in 2016 and increased by 25.46% on day 20 and  
507 by 10.30% on day 30 in 2017.

508 Significant differences between the foliar protein contents of the well-watered  
509 treatment and well-watered+DCPTA treatment were observed on day 10 in 2017 and  
510 on day 15 in 2017, and significant differences between the free amino acid contents of  
511 these treatments were observed on day 10 in 2017.

## 512 **Discussion**

513 One of the most clear and consistent effects of drought on crops is the inhibition  
514 of growth and yield (Sinclair, 2011). In this experiment, exogenous DCPTA partly  
515 mitigated the reductions in plant growth and yield induced by drought, as expressed  
516 by the stable root and root RGR, GN and GY (Fig. 5, Fig. 6 and Fig. 7). Moreover,  
517 exogenous DCPTA promoted growth and yield under well-watered conditions.

518 N is a necessary macro-nutrient element for plants and a main limiting factor in  
519 plant growth and development (Kusano *et al.*, 2011). The pre-female inflorescence  
520 emergence stage is the important stage determining maize yield (Talaat *et al.*, 2015).  
521 The inhibition of maize growth induced by drought could be partly attributed to  
522 nitrogen metabolism during the pre-female inflorescence emergence stage.  $\text{NO}_3^-$  is  
523 the main nitrogen source assimilated by higher plants in agricultural soils (Robredo *et al.*  
524 *et al.*, 2011). Similar to previous reports for tomato (Sánchez-Rodríguez *et al.*, 2011) and  
525 wheat (Fresneau *et al.*, 2007), drought significantly diminished the  $\text{NO}_3^-$  content in  
526 maize leaves in both the DCPTA-treated and non-treated leaves (Fig. 14). This  
527 decrease may be explained by drought-induced inhibitions in nitrate uptake from the

528 roots and/or nitrate transport. However, the reduction in the non-treated leaves was  
529 greater than that in the DCPTA-treated leaves in this study.

530 Maintaining the supply of nutrients and water from the soil to crop depends on  
531 root morphology, which can be characterized by RLD and RSD (Kamran *et al.*, 2018).  
532 Previous studies have reported that DCPTA promotes root development in tomatoes  
533 (Keithly *et al.*, 1990a). In this study, there was a significant difference between the  
534 RLD and RSD of the well-watered treatment and DCPTA treatment in 0–20 cm and  
535 0–30 cm in 2016 and 2017 on day 30 (Fig. 8). This result suggests that DCPTA  
536 promoted root development in maize under well-watered conditions. Interestingly,  
537 under drought conditions, the DCPTA application significantly increased RLD, RSD  
538 and the root RGR. These results indicate that the DCPTA application also promoted  
539 maize root growth and improved the spatial and temporal distribution of roots, which  
540 was beneficial to  $\text{NO}_3^-$  uptake under drought conditions.

541 The xylem sap transports water and nutrients from the roots throughout the plant  
542 and depends on transpiration intensity and root pressure. The increased root hydraulic  
543 conductivity and flow rate of root-bleeding sap induced by the DCPTA application  
544 may, due to the enhanced root pressure, which depend on physiological activity of the  
545 whole root system (Fig. 9) (Noguchi *et al.*, 2005; Lui *et al.*, 2014). In addition, the  
546  $\text{NO}_3^-$  delivery rate in the presence of DCPTA was significantly higher than that  
547 without DCPTA under drought conditions, which may partly result from the improved  
548  $\text{NO}_3^-$  absorption and enhanced root pressure induced by DCPTA. The stable RLWC  
549 in the drought+DCPTA treatment suggests an abundant supply water to the  
550 aboveground parts, and balanced transpirational loss and water uptake under drought  
551 conditions; as a result, the DCPTA-treated plants maintained  $G_s$ , which reduced the  
552 leaf epidermal resistance and promoted the mass flow of water to the leaf surface and  
553 the transportation of the  $\text{NO}_3^-$  required for N metabolism in leaves (Fig. 10 and Fig.  
554 11). Under drought conditions, increases in the foliar  $\text{NO}_3^-$  were observed in the  
555 DCPTA-treated plants (Fig. 14).

556 Whether stomatal or non-stomatal factors are the main cause of a reduced  $P_n$

557 may be determined by changes in  $G_s$  and  $C_i$  (Bethke and Drew, 1992). During the  
558 early period of drought, the change of  $C_i$  were accompanied by continuously declined  
559  $G_s$ , then  $G_s$  decreases but  $C_i$  shows an increase (Fig. 11).  
560 Thus, the decrease of the  $P_n$  in drought-treated plants was mainly attributed to  
561 stomatal limitations firstly, and then, non-stomatal limitations induced by the damage  
562 of photochemical mechanism, partly reflected by damaged chloroplast (Fig. 12).  
563 However, DCPTA application maintains relatively high  $G_s$ , ensuring the availability  
564 of  $CO_2$  for the carbon reduction cycle. Simultaneously, the DCPTA application  
565 delayed the increase in  $C_i$  and protected the chloroplast ultrastructure against  
566 drought-induced oxidative damage, which suggests that DCPTA can protect the  
567 photochemical mechanism and, as a result, ensures a more efficient photosynthesis  
568 process after rehydration. Moreover, similar to previous studies on spruce (Keithly *et*  
569 *al.*, 1990a), sugar beets (Keithly *et al.*, 1990b) and guayule (Wan and Mendoza, 1992),  
570 DCPTA application also promoted photosynthesis under well-watered conditions.

571 In most plants, nitrate reduction occurs in leaves.  $NO_3^-$ , after being taken up into  
572 the leaf cell, is converted to  $NH_4^+$  by two successive steps catalysed by NR and NiR.  
573 NR, the rate-limiting enzyme of nitrogen assimilation, is highly sensitive to stress  
574 (Plett *et al.*, 2016). Similar to previous studies on wheat and barley, the NR activity  
575 continuously declined in response to drought (Fig. 15) (Robredo *et al.*, 2011;  
576 Fresneau *et al.*, 2007). As a typical nitrate-induced enzyme, NR activity is primarily  
577 regulated by the  $NO_3^-$  concentration in the leaves (Chamizo-Ampudia *et al.*, 2017).  
578 The up-regulation of foliar NR activity in the drought+DCPTA treatment may result  
579 from the increase in the foliar  $NO_3^-$  content (Fig. 14). Moreover, the reduction in the  
580 foliar NiR activity under drought conditions was significantly reversed by the  
581 application of DCPTA, which may be because the DCPTA-stabilized photosynthesis  
582 resulted in a sufficient supply of  $Fd_{red}$  (Fig. 11 and Fig. 15), thus promoting the  
583 conversion of  $NO_2^-$  to  $NH_4^+$ . The present results indicate that DCPTA pretreatment  
584 could maintain a high  $NO_3^-$  assimilation ability in maize under drought conditions.

585 Although the foliar NR and NiR activities declined during the drought period, the

586 foliar  $\text{NH}_4^+$  content exhibited an increasing tendency in our experiment (Fig. 14). This  
587 increase may be associated with the glycine oxidation in activated photorespiration,  
588 which is induced by decreases in  $C_i$  levels under drought conditions (Wang *et al.*,  
589 2012). The increased  $G_s$  induced by DCPTA was beneficial to the increase in  $\text{CO}_2$  in  
590 the cellular spaces of the leaf, implying that photorespiration was partly alleviated  
591 (Fig. 11).

592 In plants cells, excessive levels of  $\text{NH}_4^+$  are destructive, and the major  $\text{NH}_4^+$   
593 assimilation pathway is the GS/GOGAT cycle in higher plants. When the  
594 GS/GOGAT cycle is suppressed and the  $\text{NH}_4^+$  content rises continuously under  
595 stress,  $\text{NH}_4^+$  could serve as a substrate to form glutamate via the reversible amination  
596 of 2-OG by GDH catalyse, although the enzyme has a lower affinity for  $\text{NH}_4^+$   
597 (Fontaine *et al.*, 2012). In general, drought inhibited  $\text{NH}_4^+$  assimilation (Naya *et al.*,  
598 2007). During the early period of drought, GDH activity increased sharply, GS  
599 activity increased slightly, and GOGAT remained stable (Fig. 16). These results  
600 suggest that accelerated  $\text{NH}_4^+$  assimilation in maize may be an adaptive mechanism  
601 to produce more glutamate and eliminate the accumulation of excess foliar  $\text{NH}_4^+$ .  
602 Subsequently, the GS and GOGAT activities decreased, which may have resulted  
603 from an inadequate supply of energy and 2-OG because of photosynthetic inhibition  
604 and decreased ICDH activity (Fig. 13). GDH activity decreased with drought, which  
605 may be due to the oxidative degradation of GS caused by the overproduction of  
606 reactive oxygen species (ROS) induced by drought conditions (Xia *et al.*, 2015).

607 The DCPTA application altered the major  $\text{NH}_4^+$  assimilation pathway,  
608 maintained the GOGAT/GS cycle and suppressed the GDH pathway, which may  
609 have contributed to maintaining the conversion of  $\text{NH}_4^+$  to glutamine and the  
610 subsequent formation of glutamate from glutamine. This result may occur because  
611 the photosynthetic stability and ICDH activity induced by the DCPTA application  
612 promoted 2-OG synthesis and the reducing power (i.e., NADPH, ATP, or  $\text{Fd}_{\text{red}}$ ) in  
613 plants during the drought period, thus providing the GS/GOGAT cycle with  
614 relatively sufficient substrates and energy and favouring the enhancement of foliar

615 GOGAT and GS activities (Du *et al.*, 2016). As a result, with the application of  
616 DCPTA, drought had less of an effect on the activities of GS and GOGAT.

617 Although DCPTA promoted  $\text{NO}_3^-$  assimilation, as expressed by the increased NR  
618 and NiR activities (Fig. 15), this treatment compared to the drought treatment caused  
619 significant decreases in the  $\text{NH}_4^+$  content, which means that exogenous DCPTA  
620 resulted in the integration of  $\text{NH}_4^+$  into the structure of organic compounds, thereby  
621 contributing to the reduction in the  $\text{NH}_4^+$  content. Therefore, the DCPTA application  
622 effectively modulated the activities of ICDH, GS, GOGAT and GDH and accelerated  
623 the conversion of  $\text{NH}_4^+$  to glutamate, which is the precursor of other amino acids.

624 Transamination is a key step in the biosynthesis of various amino acids from  
625 glutamate, with the availability of C skeletons from the Krebs cycle (Hodges, 2002).  
626 In our studies, both the aminotransferases studied, AlaAT and AspAT, showed  
627 increased activity in maize during the early drought period (Fig. 17). Such increases  
628 in aminotransferases activities under drought conditions might help in the synthesis of  
629 increased amounts of amino acids that act as compatible cytoplasmic solutes and  
630 protect cell organelles and biomolecules, thus reducing the adverse effects of drought  
631 on maize (Munns and Tester, 2008). Subsequently, the AlaAT and AspAT activities  
632 decreased, which may be attributable to the weakened GS/NADH-GOGAT pathway  
633 (Fig. 16) (Gangwar and Singh, 2011). Moreover, stable aminotransferase activities  
634 were observed in DCPTA-treated plants. This finding may be associated with  
635 increased GS/GOGAT activities, which can generate more glutamate to serve as a  
636 substrate for transamination reactions in maize treated with DCPTA under drought  
637 conditions.

638 Most soluble proteins are enzymes that participate in various metabolic  
639 pathways in plants; therefore, the soluble protein content is considered one of the  
640 most important indices reflecting the overall metabolic level in plants. Protein  
641 synthesis in plants is very sensitive to abiotic stresses and is positively correlated with  
642 stress tolerance (Fresneau *et al.*, 2007). Free amino acids are the building blocks of  
643 proteins. Drought increased the free amino acid contents, which may mainly be

644 attributed to the increased AlaAT and AspAT activities in the early drought period  
645 and the subsequent promotion of protein degradation (Fig. 18) (Yang *et al.*, 2013).  
646 However, DCPTA-treated seedlings maintained higher soluble protein levels and  
647 lower free amino acid levels than did non-DCPTA-treated seedlings in response to  
648 drought. This result may occur because DCPTA inhibited protein degradation by  
649 stable protease activities and maintained protein stability, ensuring the series of  
650 physiological and biochemical processes that occur normally under stress conditions.  
651 Additionally, the DCPTA application increased the amino acid contents under  
652 well-watered conditions, which may be attributable to the promoted biosynthesis and  
653 accumulation of amino acids, which ultimately improved plant growth and  
654 development (Talaat and Shawky, 2016).

## 655 **Conclusions**

656 The present study suggested that DCPTA treatment increased  $\text{NO}_3^-$  uptake and  
657 the long-distance transportation of  $\text{NO}_3^-$  from the roots to the leaves via the  
658 production of excess roots and maintained a stabilized transpiration rate. The  
659 increased foliar  $\text{NO}_3^-$  content up-regulated NR activity and maintained a high N  
660 assimilation ability that was restrained by drought. Exogenous DCPTA effectively  
661 regulated the ICDH, GS, GOGAT and GDH activities to speed up the conversion of  
662  $\text{NH}_4^+$  to Glu, reduced the toxicity of excess  $\text{NH}_4^+$  to the plant, and accelerated the  
663 synthesis of proteins and amino acids. Moreover, DCPTA treatment maintained  
664 increased the photosynthetic capacity, supply nitrogen metabolism of energy and  
665 carbon skeleton thus alleviating the inhibition of growth by drought in maize.

666

667 **Acknowledgements** This work was supported by the National Key Research  
668 and Development Program of China (2016YFD0300103), the National Key Research  
669 and Development Program of China (2017YFD0300506), and the “Academic  
670 Backbone” Project of Northeast Agricultural University (17XG23).

671



672 **References**

- 673 **Ali F, Bano A, Fazal A.** 2017. Recent methods of drought stress tolerance in  
674 plants. *Plant Growth Regulation* **82**, 1–13. doi: 10.1007/s10725-017-0267-2
- 675 **Bethke PC, Drew MC.** 1992. Stomatal and nonstomatal components to inhibition of  
676 photosynthesis in leaves of capsicum annuum during progressive exposure to  
677 NaCl salinity. *Plant Physiology* **99**, 219–26. doi: 10.1104/pp.99.1.219
- 678 **Barro F, Fontes AG, Maldonado JM.** 1991. Organic nitrogen content and nitrate and  
679 nitrite reductase activities in tritordeum and wheat grown under nitrate or  
680 ammonium. *Plant and Soil* **135**, 251–256. doi: 10.1007/BF00010913
- 681 **Benedict CR, Rosenfield CL, Mahan JR, Madhavan S, Yokoyama H.** 1985. The  
682 chemical regulation of carotenoid biosynthesis in citrus. *Plant*  
683 *Science* **41**, 169–173. doi: 10.1016/0168-9452(85)90084-6
- 684 **Bradford MM.** 1976. A rapid and sensitive method for the quantitation of microgram  
685 quantities of protein utilizing the principle of protein-dye binding. *Analytical*  
686 *Biochemistry* **72**, 248–254. doi: 10.1006/abio.1976.9999
- 687 **Cataldo DA, Maroon M, Schrader LE, Youngs VL.** 1975. Rapid colorimetric  
688 determination of nitrate in plant tissue by nitration of salicylic  
689 acid. *Communications in Soil Science and Plant Analysis* **6**, 71–80. doi:  
690 10.1080/00103627509366547
- 691 **Chamizo-Ampudia A, Sanz-Luque E, Llamas A, Galvan A, Fernandez E.** 2017.  
692 Nitrate reductase regulates plant nitric oxide homeostasis. *Trends in Plant*  
693 *Science* **22**, 163. doi: 10.1016/j.tplants.2016.12.001
- 694 **Chardon F, Noël V, Masclaux-Daubresse C.** 2012. Exploring new  
695 arabidopsis ideotypes to improve yield and seed quality. *Journal of Experimental*  
696 *Botany* **63**, 3401. doi: 10.1093/jxb/err353
- 697 **Cottenie A, Verloo M, Kiekens L, Velghe G, Camerlynck R.** 1982. Chemical  
698 analysis of plants and soils. Laboratory of analytical and agrochemistry. State  
699 University, Ghent, 14–24.
- 700 **Drapeau G.** 1974. Protease from *Staphylococcus aureus*. In: Lorand L (ed) *Method of*

- 701 enzymology. Academic Press., New York, 469.
- 702 **Du J, Shu S, An Y, Zhou H, Guo S, Sun J.** 2016. Influence of exogenous spermidine  
703 on carbon–nitrogen metabolism under Ca(NO<sub>3</sub>)<sub>2</sub>, stress in cucumber root. *Plant*  
704 *Growth Regulation* **81**, 1–13. doi: 10.1007/s10725-016-0193-8
- 705 **Fontaine JX, Tercé-laforgue T, Armengaud P, Clément G, Renou JP, Pelletier S,**  
706 **Catterou M, Azzopardi M, Gibon Y, Lea PJ, Hirel B, Dubois F.** 2012.  
707 Characterization of a NADH-dependent glutamate dehydrogenase mutant of  
708 arabidopsis demonstrates the key role of this enzyme in root carbon and nitrogen  
709 metabolism. *Plant Cell* **24**, 4044–4065. doi: 10.1105/tpc.112.103689
- 710 **Fresneau C, Ghashghaie J, Cornic G.** 2007. Drought effect on nitrate reductase and  
711 sucrose-phosphate synthase activities in wheat (*Triticum durum* L.): role of leaf  
712 internal CO<sub>2</sub>. *Journal of Experimental Botany* **58**, 2983. doi: 10.1093/jxb/erm150
- 713 **Gangwar S, Singh VP.** 2011. Indole acetic acid differently changes growth and  
714 nitrogen metabolism in *Pisum sativum* L. seedlings under chromium (VI)  
715 phytotoxicity: implication of oxidative stress. *Scientia Horticulturae* **129**,  
716 321–328. doi: 10.1016/j.scienta.2011.03.026
- 717 **Gausman HW, Burd JD, Quisenberry J, Yokoyama H, Dilbeck R, Chan RB.**1985.  
718 Effect of 2-diethylaminoethyl-3,4-dichlorophenylether (DCPTA) on cotton plant  
719 (*Gossypium hirsutum*) growth and phenology. *Nature Biotechnology* **3**, 255–257.  
720 doi: 10.1038/nbt0385-255
- 721 **Groat RG, Vance CP.** 1982. Root and nodule enzymes of ammonia assimilation in  
722 two plant-conditioned symbiotically ineffective genotypes of alfalfa (*Medicago*  
723 *sativa* L.). *Plant Physiology* **69**, 614–618. doi: 10.1104/pp.69.3.614
- 724 **Guan D, Al-Kaisi MM, Zhang Y, Duan L, Tan W, Zhang M, Li Z.** 2014. Tillage  
725 practices affect biomass and grain yield through regulating root growth,  
726 root-bleeding sap and nutrients uptake in summer maize. *Field Crop*  
727 *Research* **157**, 89–97. doi: 10.1016/j.fcr.2013.12.015
- 728 **Hodges M.** 2000. Enzyme redundancy and the importance of 2-oxoglutarate in plant  
729 ammonium assimilation. *Journal of Experimental Botany* **53**, 905. doi:

- 730 10.1093/jexbot/53.370.905
- 731 **Hu L, Xiang L, Li Z, Zhou X, Zou Z, Hu X.** 2014. The photoprotective role of  
732 spermidine in tomato seedlings under salinity-alkalinity stress. *Plos One* **9**,  
733 e110855. doi: 10.1371/journal.pone.0110855
- 734 **Ida S, Morita Y.** 1973. Purification and general properties of spinach leaf nitrite  
735 reductase. *Plant and Cell Physiology* **14**, 661-671. doi:  
736 10.1093/oxfordjournals.pcp.a074901
- 737 **Jia Y, Zou D, Wang J, Liu H, Inayat MA, Sha H, Zheng H, Sun J, Zhao H.** 2015.  
738 Effect of low water temperature at reproductive stage on yield and glutamate  
739 metabolism of rice (*Oryza sativa*, L.) in China. *Field Crop Research* **175**, 16–25.  
740 doi: 10.1016/j.fcr.2015.01.004
- 741 **Kamran M, Su W, Ahmad I, Meng X, Cui W, Zhang X, Mou S, Aaqil K, Han Q,**  
742 **Liu T.** 2018. Application of paclobutrazol affect maize grain yield by regulating  
743 root morphological and physiological characteristics under a semi-arid region.  
744 *Scientific Reports* **8**. doi: 10.1038/s41598-018-23166-z
- 745 **Keithly JH, Yokoyama H, Gausman H.** 1990. Enhanced yield of tomato in response  
746 to 2-(3,4-dichlorophenoxy) triethylamine (DCPTA). *Plant Growth Regulation* **9**,  
747 127–136. doi: 10.1007/BF00027440
- 748 **Keithly JH, Yokoyama H, Gausman HW.** 1990. Effect of  
749 2-(3,4-dichlorophenoxy)triethylamine (DCPTA) on the growth and development  
750 of sugarbeet. *Plant Science* **68**, 57–64. doi: 10.1016/0168-9452(90)90152-E
- 751 **Kingsbury RW, Epstein E, Percy RW.** 1984. Physiological responses to salinity in  
752 selected lines of wheat. *Plant Physiology* **74**, 417–23. doi: 10.1104/pp.74.2.417
- 753 **Kusano M, Fukushima A, Redestig H, Saito K.** 2011. Metabolomic approaches  
754 toward understanding nitrogen metabolism in plants. *Journal of Experimental*  
755 *Botany* **62**, 1439. doi: 10.1093/jxb/erq417
- 756 **Liu P, Yin L, Deng X, Wang S, Tanaka K, Zhang S.** 2014. Aquaporin-mediated  
757 increase in root hydraulic conductance is involved in silicon-induced improved  
758 root water uptake under osmotic stress in *Sorghum bicolor* L. *Journal of*

- 759 Experimental Botany **65**, 4747. doi: 10.1093/jxb/eru220
- 760 **López-Millán AF, Morales F, Andaluz S, Gogorcena Y, Abadía A, DE LRJ, Abadía J.**  
761 2000. Responses of sugar beet roots to iron deficiency. Changes in carbon  
762 assimilation and oxygen use. Plant Physiology **124**, 885. doi:  
763 10.1104/pp.124.2.885
- 764 **López-Pérez L, Fernández-García N, Olmos E, Carvajal M.** 2007. The phi  
765 thickening in roots of broccoli plants: an acclimation mechanism to  
766 salinity? International Journal of Plant Sciences **168**, 1141–1149. doi:  
767 10.1086/520722
- 768 **Mosaddeghi MR, Mahboubi AA, Safadoust A.** 2009. Short-term effects of tillage  
769 and manure on some soil physical properties and maize root growth in a sandy  
770 loam soil in western Iran. Soil and Tillage Research **104**, 173–179. doi:  
771 10.1016/j.still.2008.10.011
- 772 **Munns R, Tester M.** 2008. Mechanisms of salinity tolerance. Annual Review of Plant  
773 Biology **59**, 651–681. doi: 10.1146/annurev.arplant.59.032607.092911
- 774 **Naya L, Ladrera R, Ramos J, González EM, Arrese-Igor C, Minchin FR, Becana**  
775 **M.** 2007. The response of carbon metabolism and antioxidant defenses of alfalfa  
776 nodules to drought stress and to the subsequent recovery of plants. Plant  
777 Physiology **144**, 1104. doi: 10.1104/pp.107.099648
- 778 **Noguchi A, Kageyama M, Shinmachi F, Schmidhalter U, Hasegawa I.** 2005.  
779 Potential for using plant xylem sap to evaluate inorganic nutrient availability in  
780 soil. Soil Science and Plant Nutrition **51**, 343–350. doi:  
781 10.1111/j.1747-0765.2005.tb00038.x
- 782 **Nuccio ML, Wu J, Mowers R, Zhou H P, Meghji M, Primavesi LF, Paul**  
783 **MJ, Chen X, Gao Y, Haque E, Basu SS, Lagrimini LM.** 2015. Expression of  
784 trehalose-6-phosphate phosphatase in maize ears improves yield in well-watered  
785 and drought conditions. Nature Biotechnology **33**, 862–869. doi:  
786 10.1038/nbt.3277
- 787 **O'Neal D, Joy KW.** 1973. Glutamine synthetase of pea leaves. I. Purification,

- 788 stabilization, and PH optima. *Archives of Biochemistry and Biophysics* **159**,  
789 113–22. doi: 10.1016/0003-9861(73)90435-9
- 790 **Plett D, Holtham L, Baumann U, Kalashyan E, Francis K, Enju A, Toubia**  
791 **J, Roessner U, Bacic A, Rafalski A, Dhugga KS, Tester M, Garnett T, Kaiser**  
792 **BN.** 2016. Nitrogen assimilation system in maize is regulated by developmental  
793 and tissue-specific mechanisms. *Plant Molecular Biology* **92**, 293–312. doi:  
794 10.1007/s11103-016-0512-5
- 795 **Sinclair TR.** 2011. Challenges in breeding for yield increase for drought. *Trends in*  
796 *Plant Science* **16**, 289–293. doi: 10.1016/j.tplants.2011.02.008
- 797 **Rajasekhar VK, Oelmüller R.** 2010. Regulation of induction of nitrate reductase and  
798 nitrite reductase in higher plants. *Physiologia Plantarum* **71**, 517–521. doi:  
799 10.1111/j.1399-3054.1987.tb02893.x
- 800 **Nacer B, Gillen AM, Alemu M, Hirut K, Fisher DK, Smith JR, Reddy KN.** 2013.  
801 Responses of nitrogen metabolism and seed nutrition to drought stress in  
802 soybean genotypes differing in slow-wilting phenotype. *Frontiers in Plant*  
803 *Science* **4**, 498. doi: 10.3389/fpls.2013.00498
- 804 **Robredo A, Pérez-López U, Miranda-Apodaca J, Lacuesta M, Mena-Petite A,**  
805 **Muñoz-Rueda A.** 2011. Elevated CO<sub>2</sub> reduces the drought effect on nitrogen  
806 metabolism in barley plants during drought and subsequent  
807 recovery. *Environmental and Experimental Botany* **71**, 399–408. doi:  
808 10.1016/j.envexpbot.2011.02.011
- 809 **Sánchez-Rodríguez E, Rubio-Wilhelmi MM, Ríos JJ, Blasco B, Rosales MÁ,**  
810 **Melgarejo R, Romero L, Ruiz JM.** 2011. Ammonia production and  
811 assimilation: its importance as a tolerance mechanism during moderate water  
812 deficit in tomato plants. *Journal of Plant Physiology* **168**, 816. doi:  
813 10.1016/j.jplph.2010.11.018
- 814 **Schiermeier Q.** 2014. The parched planet: water on tap. *Nature* **510**, 326–328. doi:  
815 10.1016/j.jplph.2010.11.018
- 816 **Slaterry RA, Walker BJ, Weber A, Ort DR.** 2017. The impacts of fluctuating light

- 817 on crop performance. *Plant Physiology* **176**, 990–1003. doi:  
818 10.1104/pp.17.01234
- 819 **Talaat NB, Shawky BT.** 2016. Dual application of 24-epibrassinolide and spermine  
820 confers drought stress tolerance in maize (*Zea mays*, L.) by modulating  
821 polyamine and protein metabolism. *Journal of Plant Growth Regulation* **35**,  
822 518–533. doi: 10.1007/s00344-015-9557-y
- 823 **Talaat NB, Shawky BT, Ibrahim AS.** 2015. Alleviation of drought-induced  
824 oxidative stress in maize (*Zea mays*, L.) plants by dual application of  
825 24-epibrassinolide and spermine. *Environmental and Experimental Botany* **113**,  
826 47–58. doi: 10.1016/j.envexpbot.2015.01.006
- 827 **Trenberth KE, Dai A, Schrier GVD, Jones PD, Barichivich J, Briffa KR,**  
828 **Sheffield J.** 2014. Global warming and changes in drought. *Nature Climate*  
829 *Change* **4**, 17–22. doi: 10.1038/nclimate2067
- 830 **Wan JH, Mendoza K.** 1992. Effect of 2-(3,4-dichlorophenoxy) triethylamine on  
831 guayule (*Parthenium argentatum*) cell suspension cultures. *Journal of*  
832 *Agricultural and Food Chemistry* **40**, 924–926. doi: 10.1021/jf00017a046
- 833 **Wang H, Wu Z, Han J, Zheng W, Yang C.** 2012. Comparison of ion balance and  
834 nitrogen metabolism in old and young leaves of alkali-stressed rice plants. *Plos*  
835 *One* **7**, e37817. doi: 10.1371/journal.pone.0037817
- 836 **Weber AP.** 2007. High-throughput colorimetric method for the parallel assay of  
837 glyoxylic acid and ammonium in a single extract. *Analytical Biochemistry* **362**,  
838 151–153. doi: 10.1016/j.ab.2006.12.033
- 839 **Xia XJ, Zhou YH, Shi K, Zhou J, Foyer CH, Yu JQ.** 2015. Interplay between  
840 reactive oxygen species and hormones in the control of plant development and  
841 stress tolerance. *Journal of Experimental Botany* **66**, 2839–2856. doi:  
842 10.1093/jxb/erv089
- 843 **Xie T, Gu W, Meng Y, Li J, Li L, Wang Y, Qu D, Wei S.** 2017. Exogenous DCPTA  
844 ameliorates simulated drought conditions by improving the growth and  
845 photosynthetic capacity of maize seedlings. *Scientific Reports* **7**. doi:

846 10.1038/s41598-017-12977-1

847 **Yang Y, Lu X, Bei Y, Li B, Jin S, Guo S, Tezuka T.** 2013. Bottle gourd  
848 rootstock-grafting affects nitrogen metabolism in nacl-stressed watermelon  
849 leaves and enhances short-term salt tolerance. *Journal of Plant Physiology* **170**,  
850 653. doi: 10.1016/j.jplph.2012.12.013

851 **Yemm EW, Cocking EC.** 1955. The determination of amino-acids with  
852 ninhydrin. *Analyst* **80**, 209–214. doi: 10.1039/an9558000209

853 **Zhao J, Xue Q, Jessup KE, Hao B, Hou X, Marek TH, Xu W, Evett SR,**  
854 **O’Shaughnessy SA, Brauer DK.** 2018. Yield and water use of drought-tolerant  
855 maize hybrids in a semiarid environment. *Field Crops Research* **216**. doi:  
856 10.1016/j.fcr.2017.11.001

857 **Ziyomo C, Bernardo R.** 2013. Drought tolerance in maize: indirect selection through  
858 secondary traits versus genomewide selection. *Crop Science* **53**, 1269–1275. doi:  
859 10.2135/cropsci2012.11.0651

860

861

862

863

864

865

866

867

868

869

870

871

872

873

874

875 **Tables**

876 **Table 1** Chemical properties of the used soil.

| Year | pH  | HCO <sub>3</sub> <sup>-</sup><br>+<br>CO <sub>3</sub> <sup>2-</sup><br>(mg<br>kg <sup>-1</sup> ) | Cl <sup>-</sup><br>(mg<br>kg <sup>-1</sup> ) | SO <sub>4</sub> <sup>2-</sup><br>(mg<br>kg <sup>-1</sup> ) | Ca <sub>2</sub> <sup>+</sup><br>(mg<br>kg <sup>-1</sup> ) | Mg <sub>2</sub> <sup>+</sup><br>(mg<br>kg <sup>-1</sup> ) | Na <sup>+</sup><br>(mg<br>kg <sup>-1</sup> ) | K <sup>+</sup><br>(mg<br>kg <sup>-1</sup> ) | N<br>(mg<br>kg <sup>-1</sup> ) | P<br>(mg<br>kg <sup>-1</sup> ) |
|------|-----|--------------------------------------------------------------------------------------------------|----------------------------------------------|------------------------------------------------------------|-----------------------------------------------------------|-----------------------------------------------------------|----------------------------------------------|---------------------------------------------|--------------------------------|--------------------------------|
| 2016 | 7.2 | 204.3                                                                                            | 297.6                                        | 463.8                                                      | 87.4                                                      | 37.6                                                      | 4.1                                          | 28.9                                        | 17.3                           | 3.9                            |
| 2017 | 7.1 | 201.7                                                                                            | 302.5                                        | 446.2                                                      | 90.3                                                      | 40.9                                                      | 4.0                                          | 31.4                                        | 16.1                           | 3.8                            |

877

878

879

880

881

882

883

884

885

886

887

888

889

890

891

892

893

894

895

896



897 **Figure legends:**

898 **Fig. 1** The rainfall (bar) and mean temperature (line) data during the study period  
899 (2016 and 2017, May–October).

900 **Fig. 2** The pits (inner length, 10 m; width, 7 m; and height, 1.2 m) used for this study  
901 and the plastic sheets used to cover inner sides of the pits.

902 **Fig. 3** Changes in the soil water content (SWC) in 2016 and 2017. The data represent  
903 the means of independent measurements with five replicates, and the standard  
904 deviations are indicated by the vertical error bars. Values with the same letters on the  
905 bars are not significantly different at  $P < 0.05$  (LSD test).

906 **Fig. 4** The tools used for the collection of bleeding sap. (A) cotton, (B) centrifuge  
907 tube, (C) scissors, (D) plastic film, and (E) deionized water.

908 **Fig. 5** Changes in the grain number  $\text{plant}^{-1}$  and grain yield  $\text{plant}^{-1}$  (g) of maize in 2016  
909 and 2017. The data represent the means of independent measurements with five  
910 replicates, and the standard deviations are indicated by the vertical error bars. Values  
911 with the same letters on the bars are not significantly different at  $P < 0.05$  (LSD test).

912 **Fig. 6** Leaf phenotypic features of the maize seedlings after 20 days of treatment with  
913 drought and/or DCPTA in 2016 and 2017.

914 **Fig. 7** Effect of drought and/or DCPTA treatment on the relative growth rate (RGR)  
915 of the shoots and roots of the maize in 2016 and 2017. The data represent the means  
916 of independent measurements with five replicates, and the standard deviations are  
917 indicated by the vertical error bars. Values with the same letters on the bars are not  
918 significantly different at  $P < 0.05$  (LSD test).

919 **Fig. 8** Effect of drought and/or DCPTA treatment on root length density (RLD) and  
920 root surface area density (RSD) for different soil depths on the 20<sup>th</sup> day and 30<sup>th</sup> day  
921 after treatment in 2016 and 2017.

922 **Fig. 9** Effect of drought and/or DCPTA treatment on root hydraulic conductivity, the  
923 flow rate of root-bleeding sap and the  $\text{NO}_3^-$  delivery rate in 2016 and 2017. The data  
924 represent the means of independent measurements with five replicates, and the  
925 standard deviations are indicated by the vertical error bars. Values with the same

926 letters on the bars are not significantly different at  $P < 0.05$  (LSD test).

927 **Fig. 10** Effect of drought and/or DCPTA treatment on relative water content of the  
928 leaves (RLWC) in 2016 and 2017. The data represent the means of independent  
929 measurements with five replicates, and the standard deviations are indicated by the  
930 vertical error bars. Values with the same letters on the bars are not significantly  
931 different at  $P < 0.05$  (LSD test).

932 **Fig. 11** Effect of drought and/or DCPTA treatment on the gas exchange parameters in  
933 the maize leaves in 2016 and 2017. Pn, net photosynthetic rate; Gs, stomatal  
934 conductance; Tr, transpiration rate; Ci, intercellular CO<sub>2</sub> concentration. The data  
935 represent the means of independent measurements with five replicates, and the  
936 standard deviations are indicated by the vertical error bars. Values with the same  
937 letters on the bars are not significantly different at  $P < 0.05$  (LSD test).

938 **Fig. 12** Ultrastructure of the photosynthetic apparatus in the maize leaves after 20  
939 days of treatment with drought and/or DCPTA in 2016 and 2017. SL, stroma lamella;  
940 GL, grana lamellae; CW, cell wall; and P, plastoglobule. The scale bars for the  
941 photosynthetic apparatus represent 2000 nm.

942 **Fig. 13** Effects of drought and/or DCPTA treatment on isocitrate dehydrogenase  
943 (ICDH) activity in 2016 and 2017. The data represent the means of independent  
944 measurements with five replicates, and the standard deviations are indicated by the  
945 vertical error bars. Values with the same letters on the bars are not significantly  
946 different at  $P < 0.05$  (LSD test).

947 **Fig. 14** Effects of drought and/or DCPTA treatment on the nitrate (NO<sub>3</sub><sup>-</sup>), nitrite  
948 (NO<sub>2</sub><sup>-</sup>) and ammonium (NH<sub>4</sub><sup>+</sup>) contents in the leaves of maize in 2016 and 2017. The  
949 data represent the means of independent measurements with five replicates, and the  
950 standard deviations are indicated by the vertical error bars. Values with the same  
951 letters on the bars are not significantly different at  $P < 0.05$  (LSD test).

952 **Fig. 15** Effects of drought and/or DCPTA treatment on nitrate reductase (NR) and  
953 nitrite reductase (NiR) activities in the leaves of maize in 2016 and 2017. The data  
954 represent the means of independent measurements with five replicates, and the

955 standard deviations are indicated by the vertical error bars. Values with the same  
956 letters on the bars are not significantly different at  $P < 0.05$  (LSD test).

957 **Fig. 16** Effects of drought and/or DCPTA treatment on the glutamine synthetase (GS),  
958 glutamate synthase (GOGAT) and glutamate dehydrogenase (GDH) activities in the  
959 leaves of maize in 2016 and 2017. The data represent the means of independent  
960 measurements with five replicates, and the standard deviations are indicated by the  
961 vertical error bars. Values with the same letters on the bars are not significantly  
962 different at  $P < 0.05$  (LSD test).

963 **Fig. 17** Effects of drought and/or DCPTA treatment on the alanine aminotransferase  
964 (AlaAT) and aspartate aminotransferase (AspAT) activities in the leaves of maize in  
965 2016 and 2017. The data represent the means of independent measurements with five  
966 replicates, and the standard deviations are indicated by the vertical error bars. Values  
967 with the same letters on the bars are not significantly different at  $P < 0.05$  (LSD test).

968 **Fig. 18** Effects of drought and/or DCPTA treatment on the protease activity and  
969 protein and free amino acid contents in the leaves of maize in 2016 and 2017. The  
970 data represent the means of independent measurements with five replicates, and the  
971 standard deviations are indicated by the vertical error bars. Values with the same  
972 letters on the bars are not significantly different at  $P < 0.05$  (LSD test).

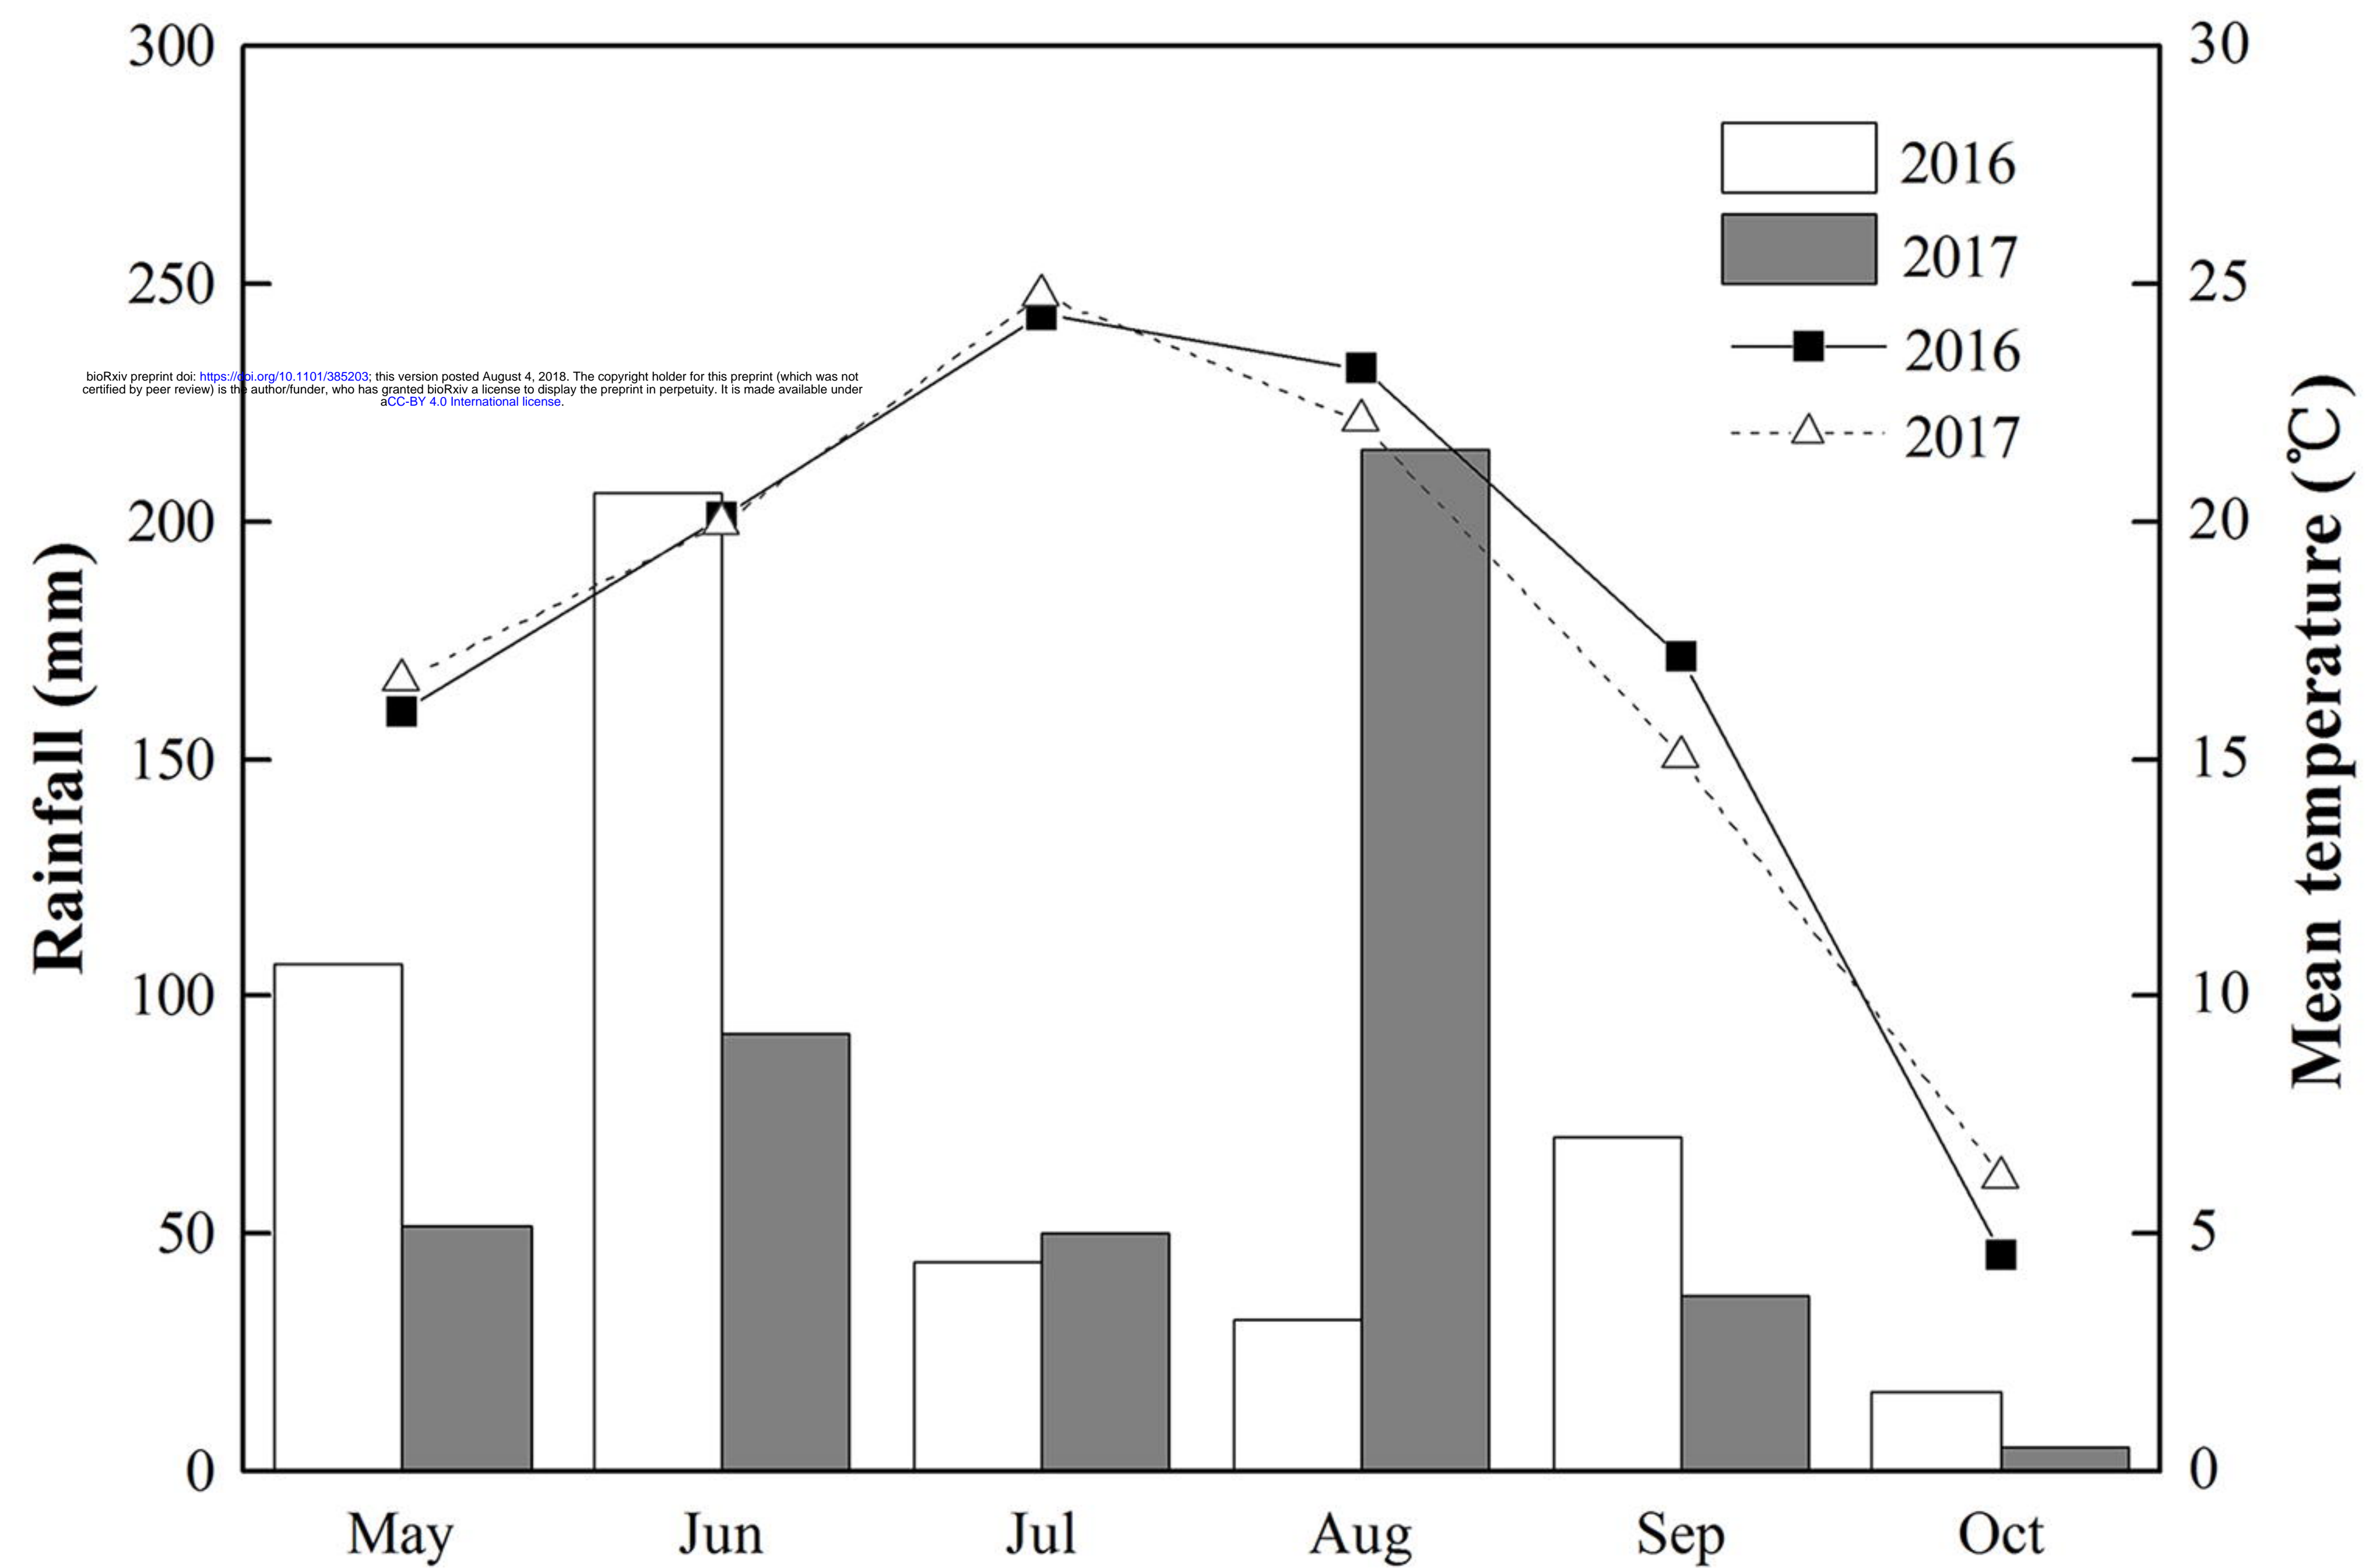

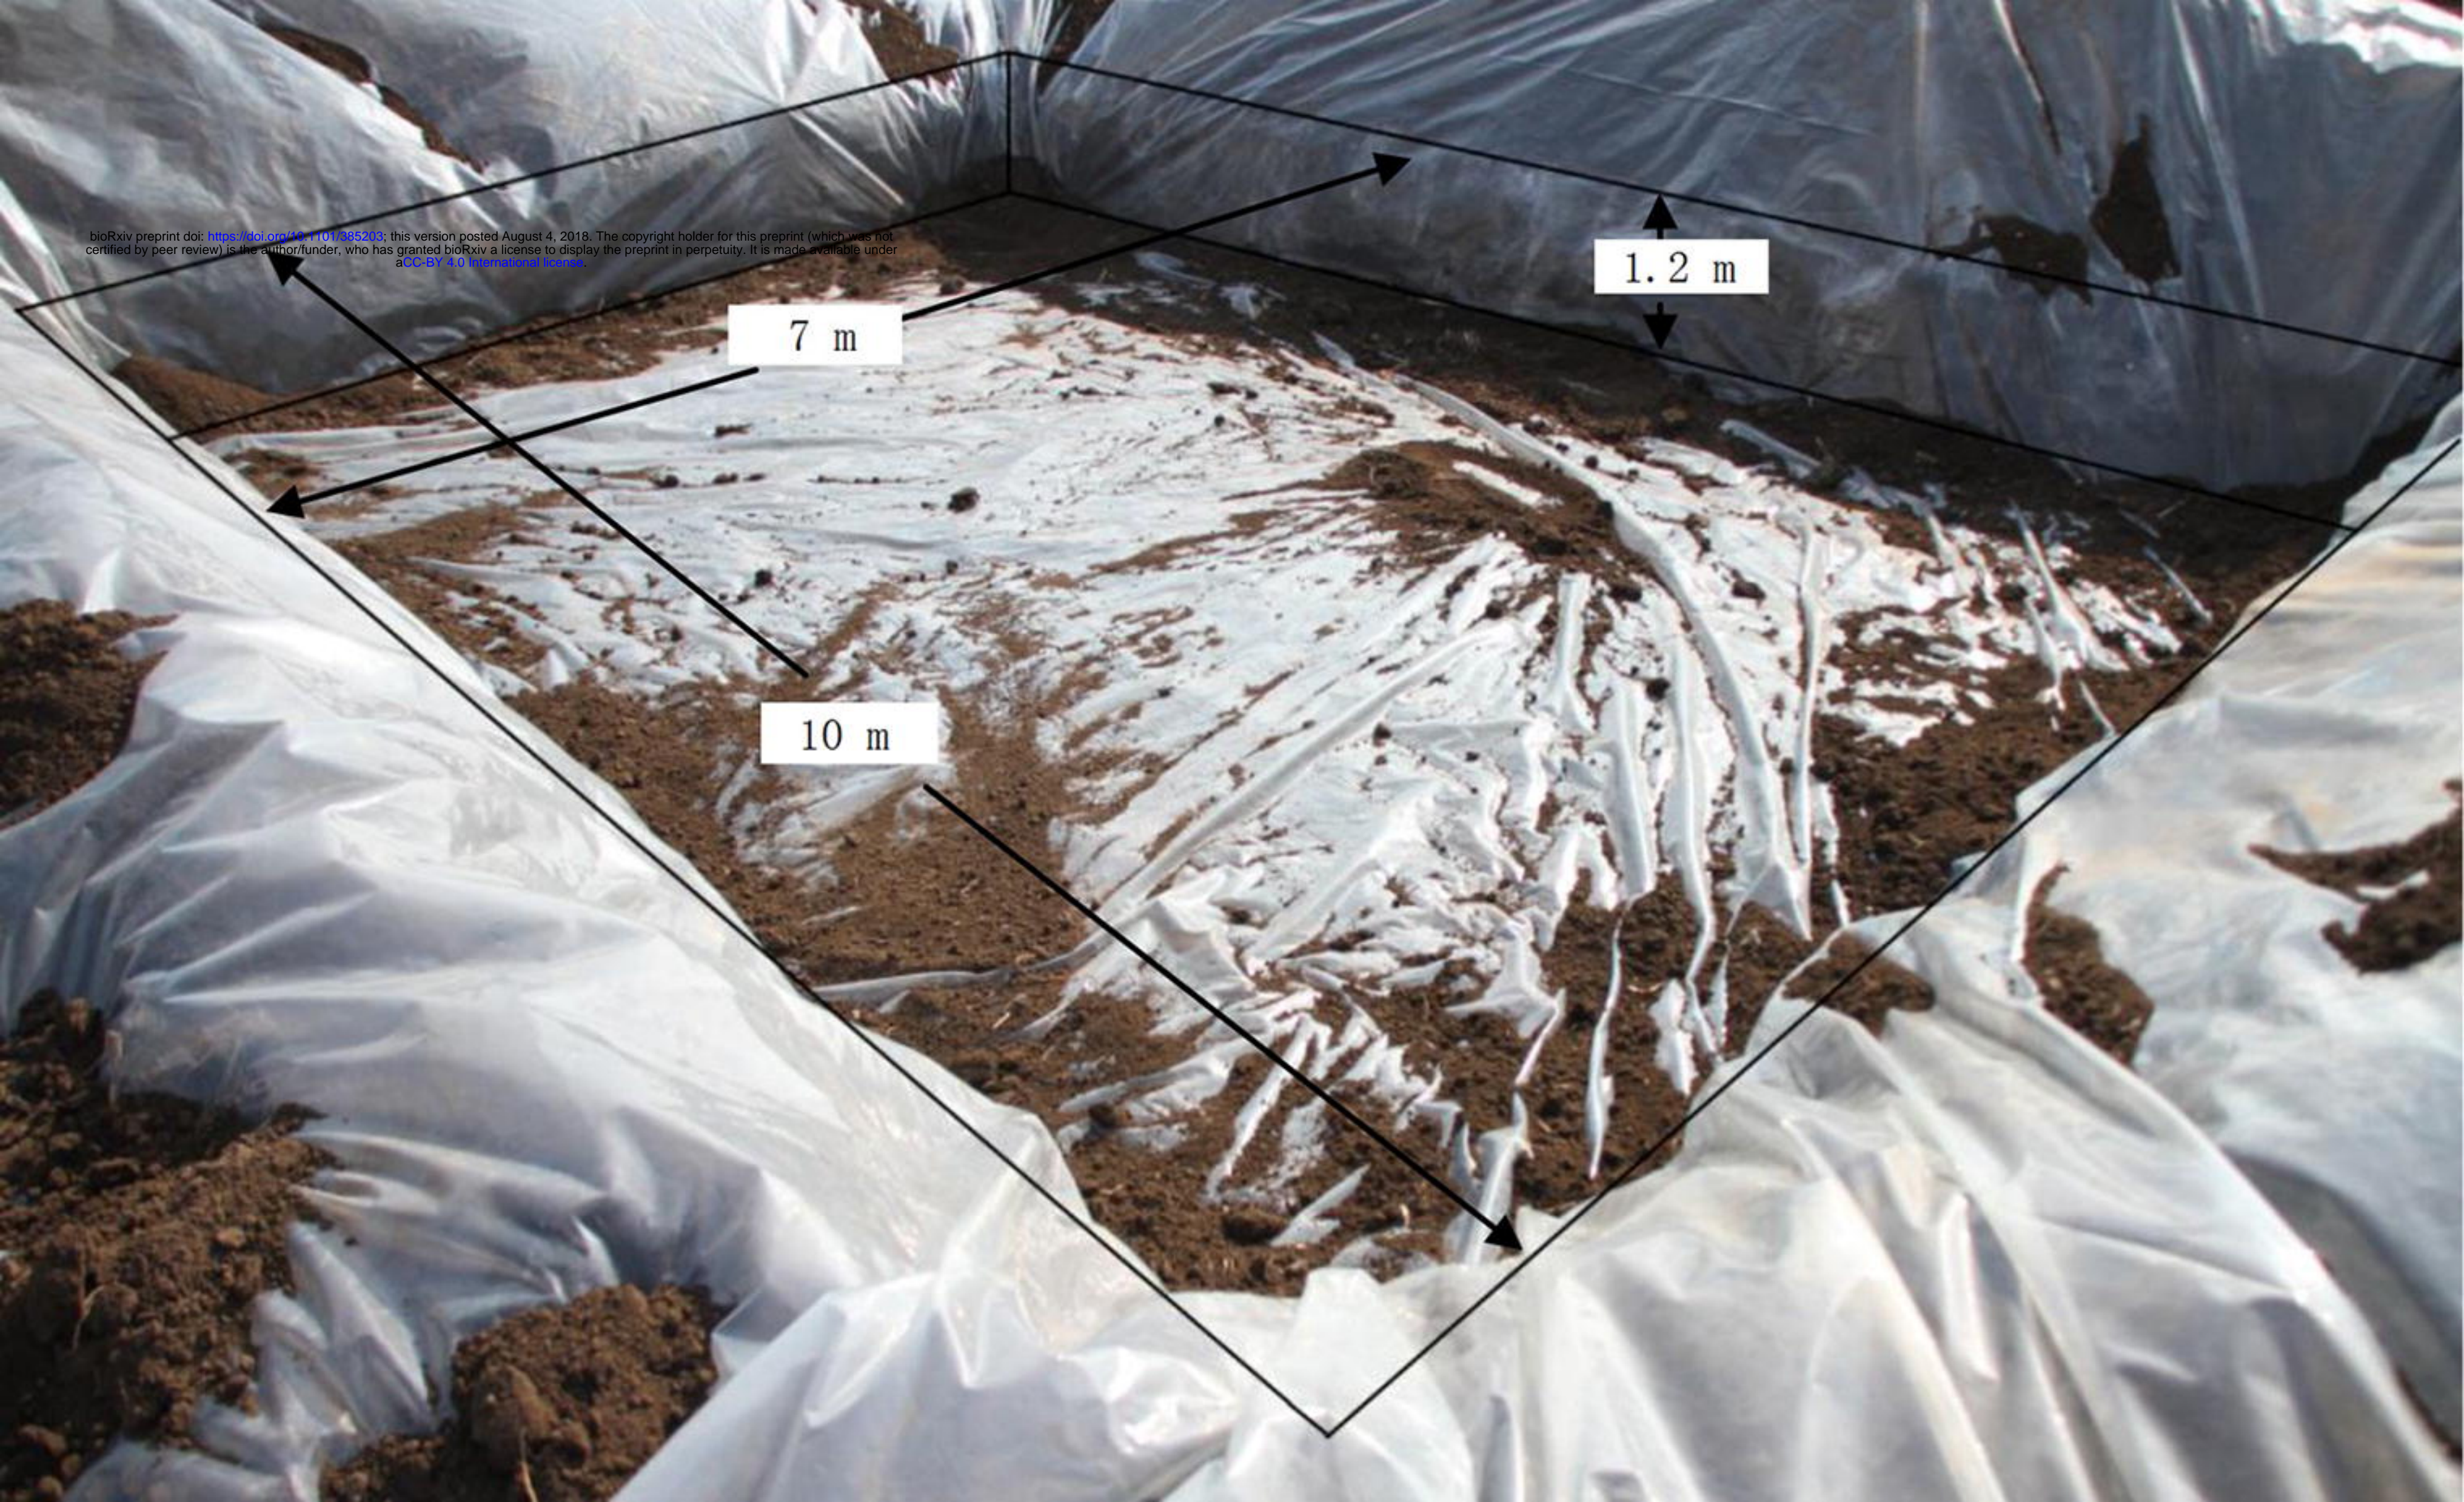

7 m

10 m

1.2 m

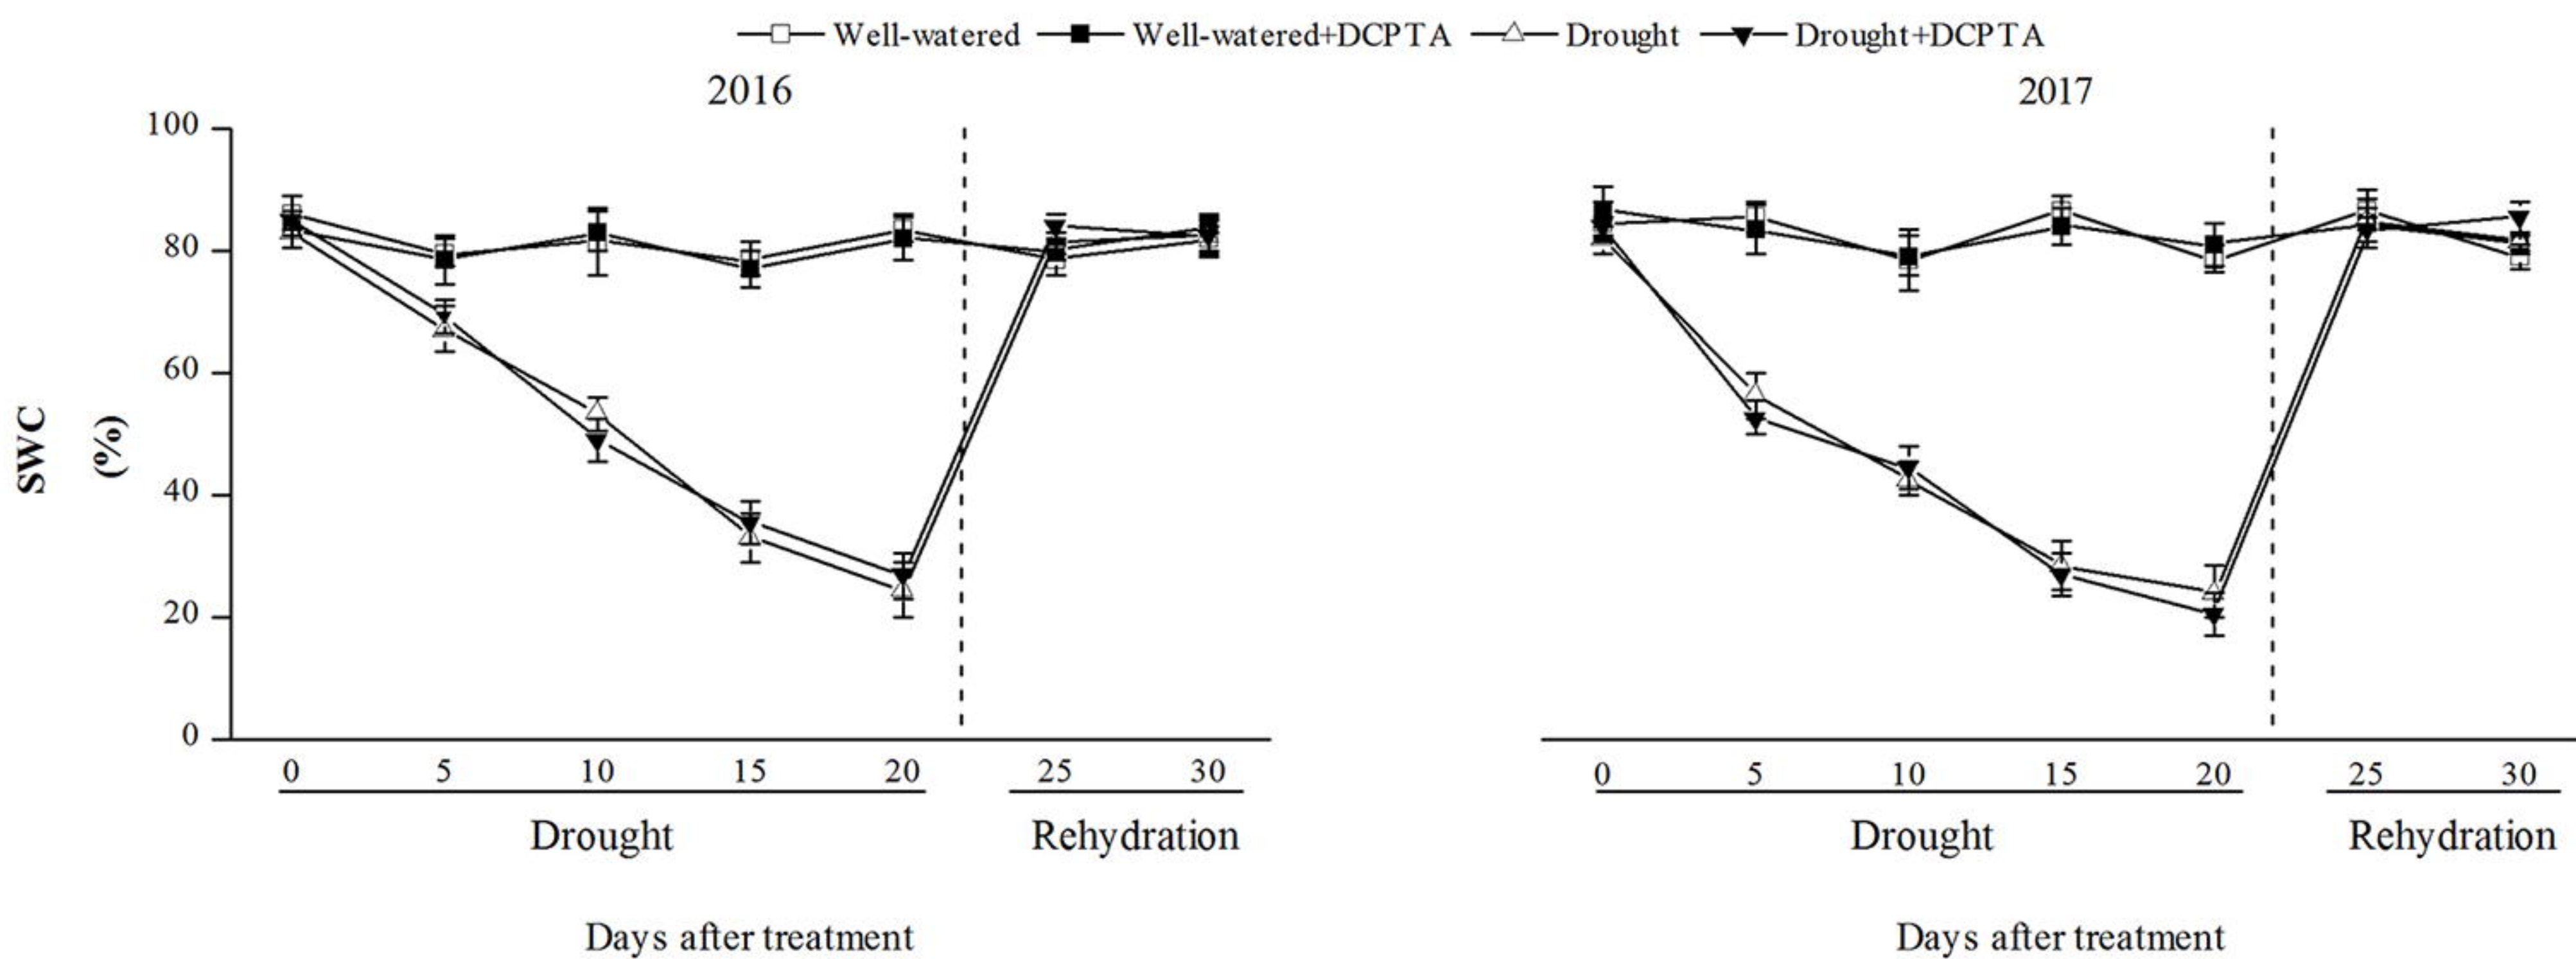

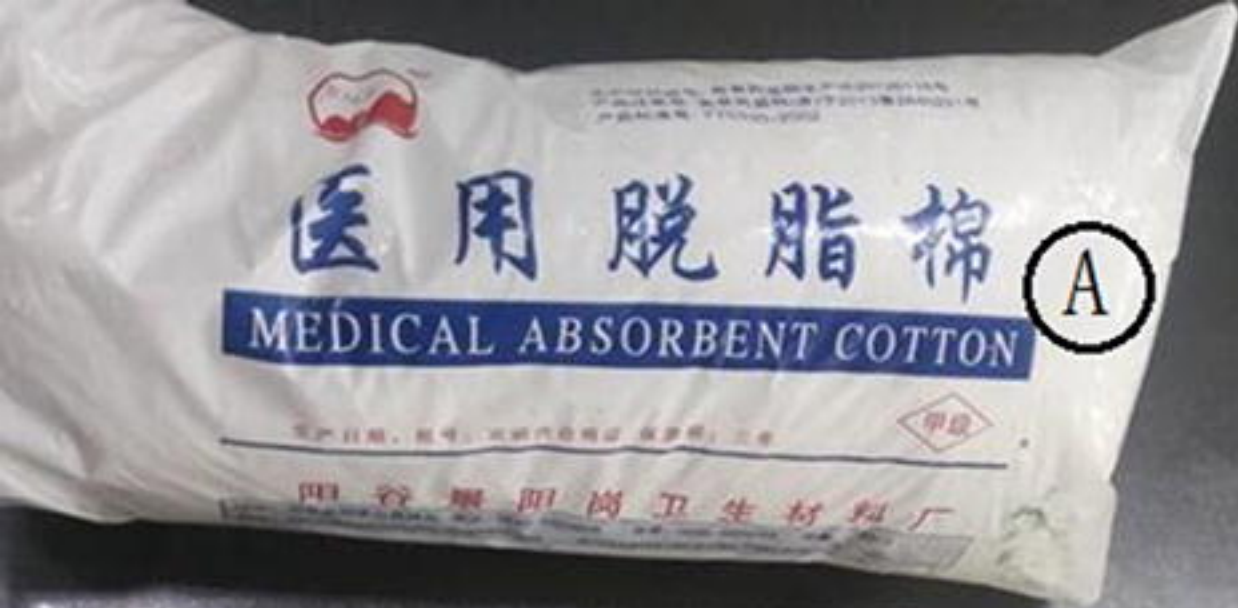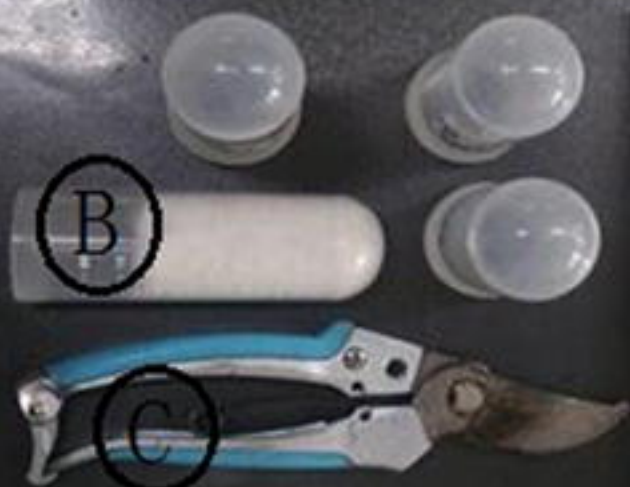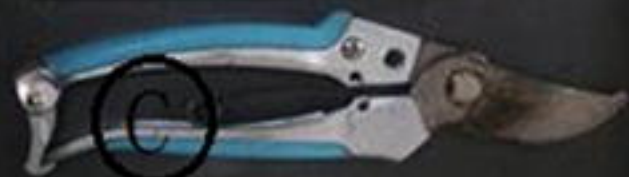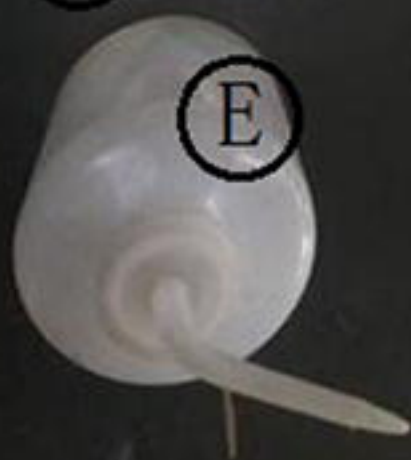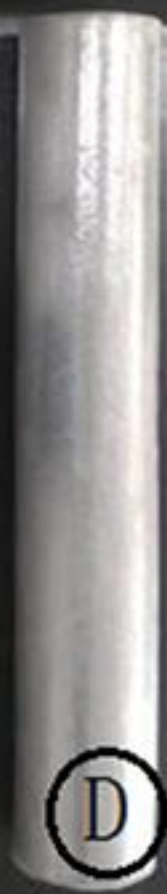

- Well-watered
- Well-watered+DCPTA
- Drought
- Drought +DCPTA

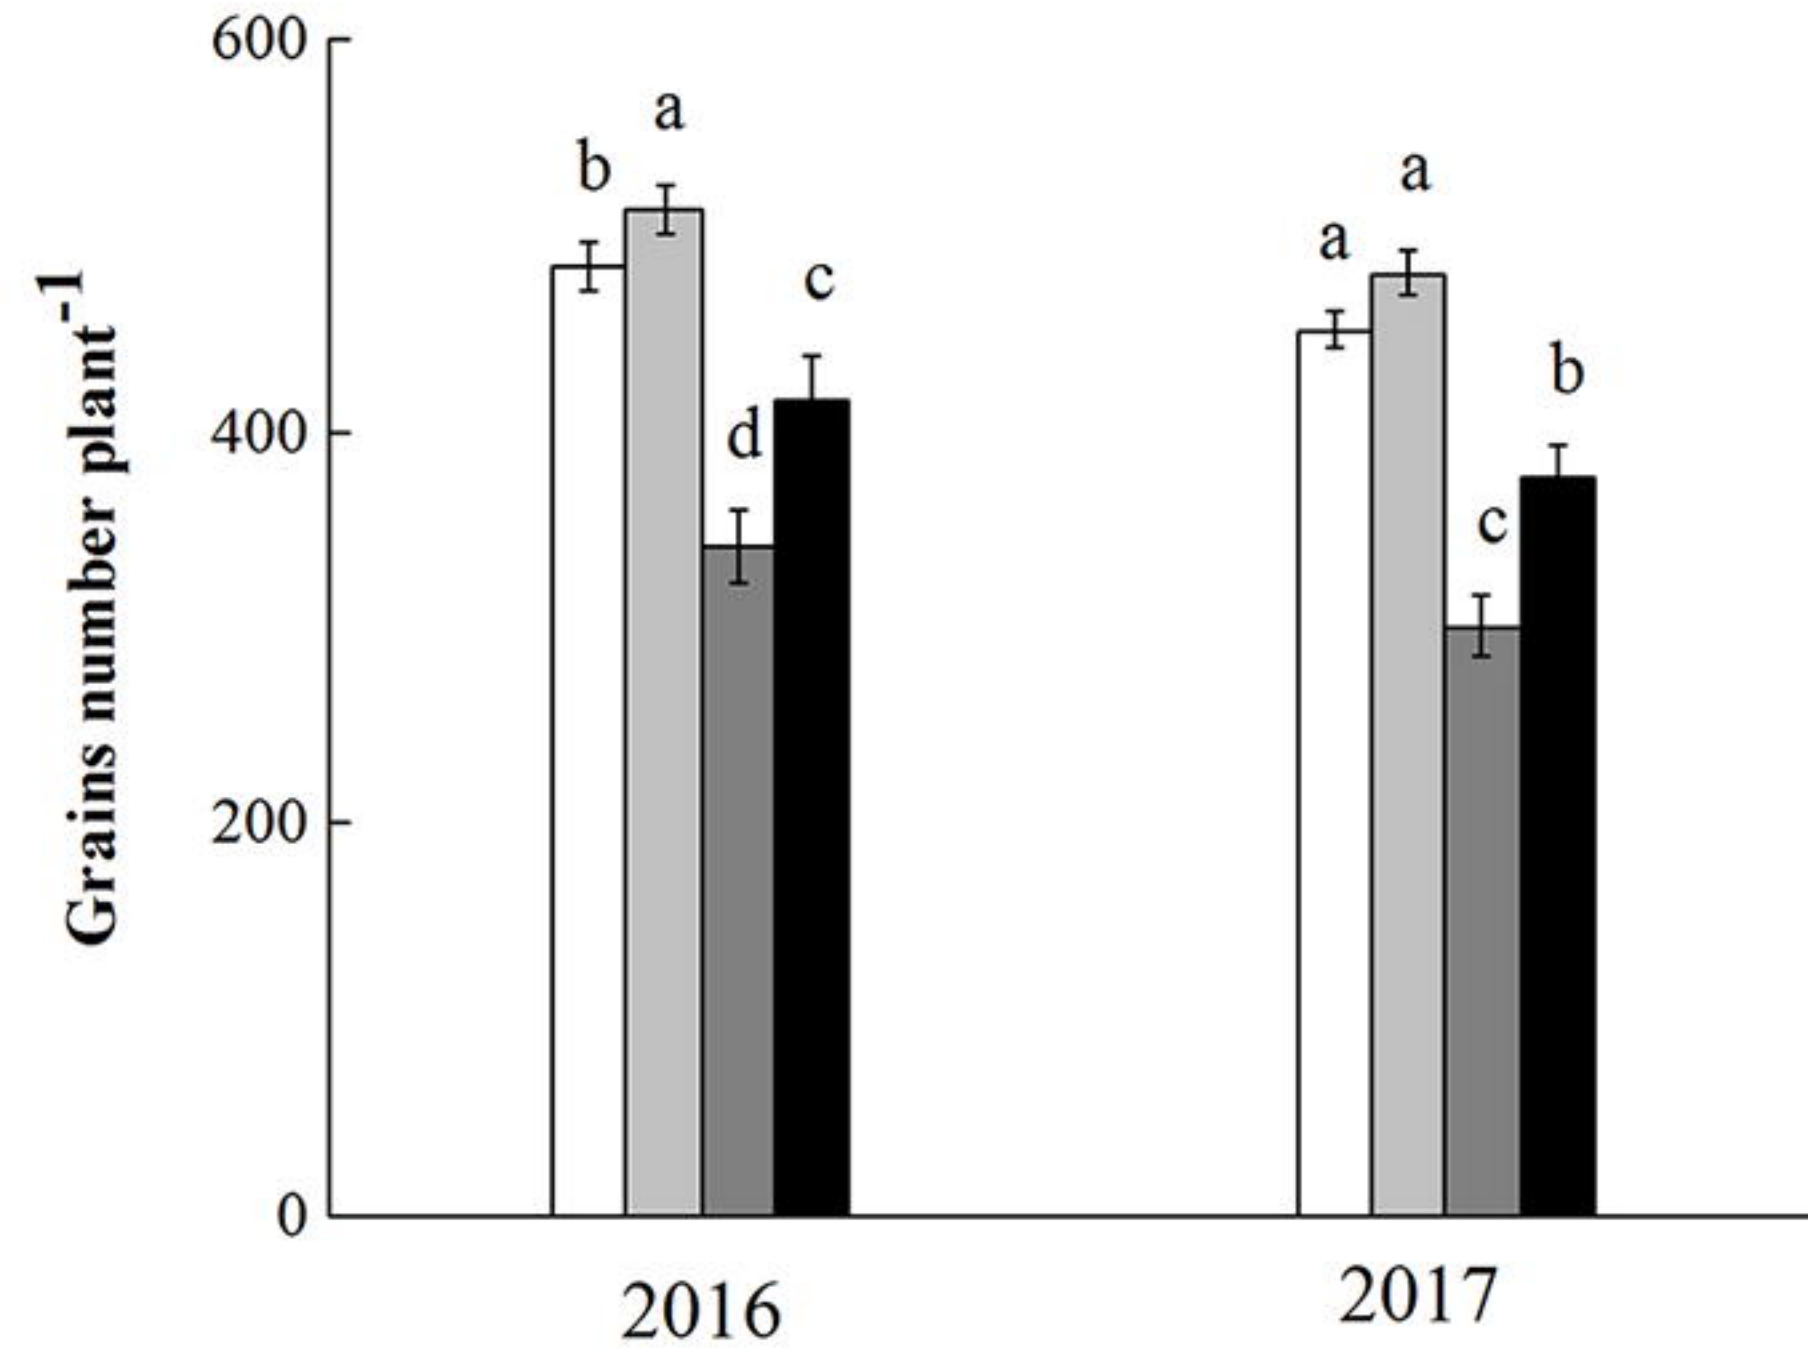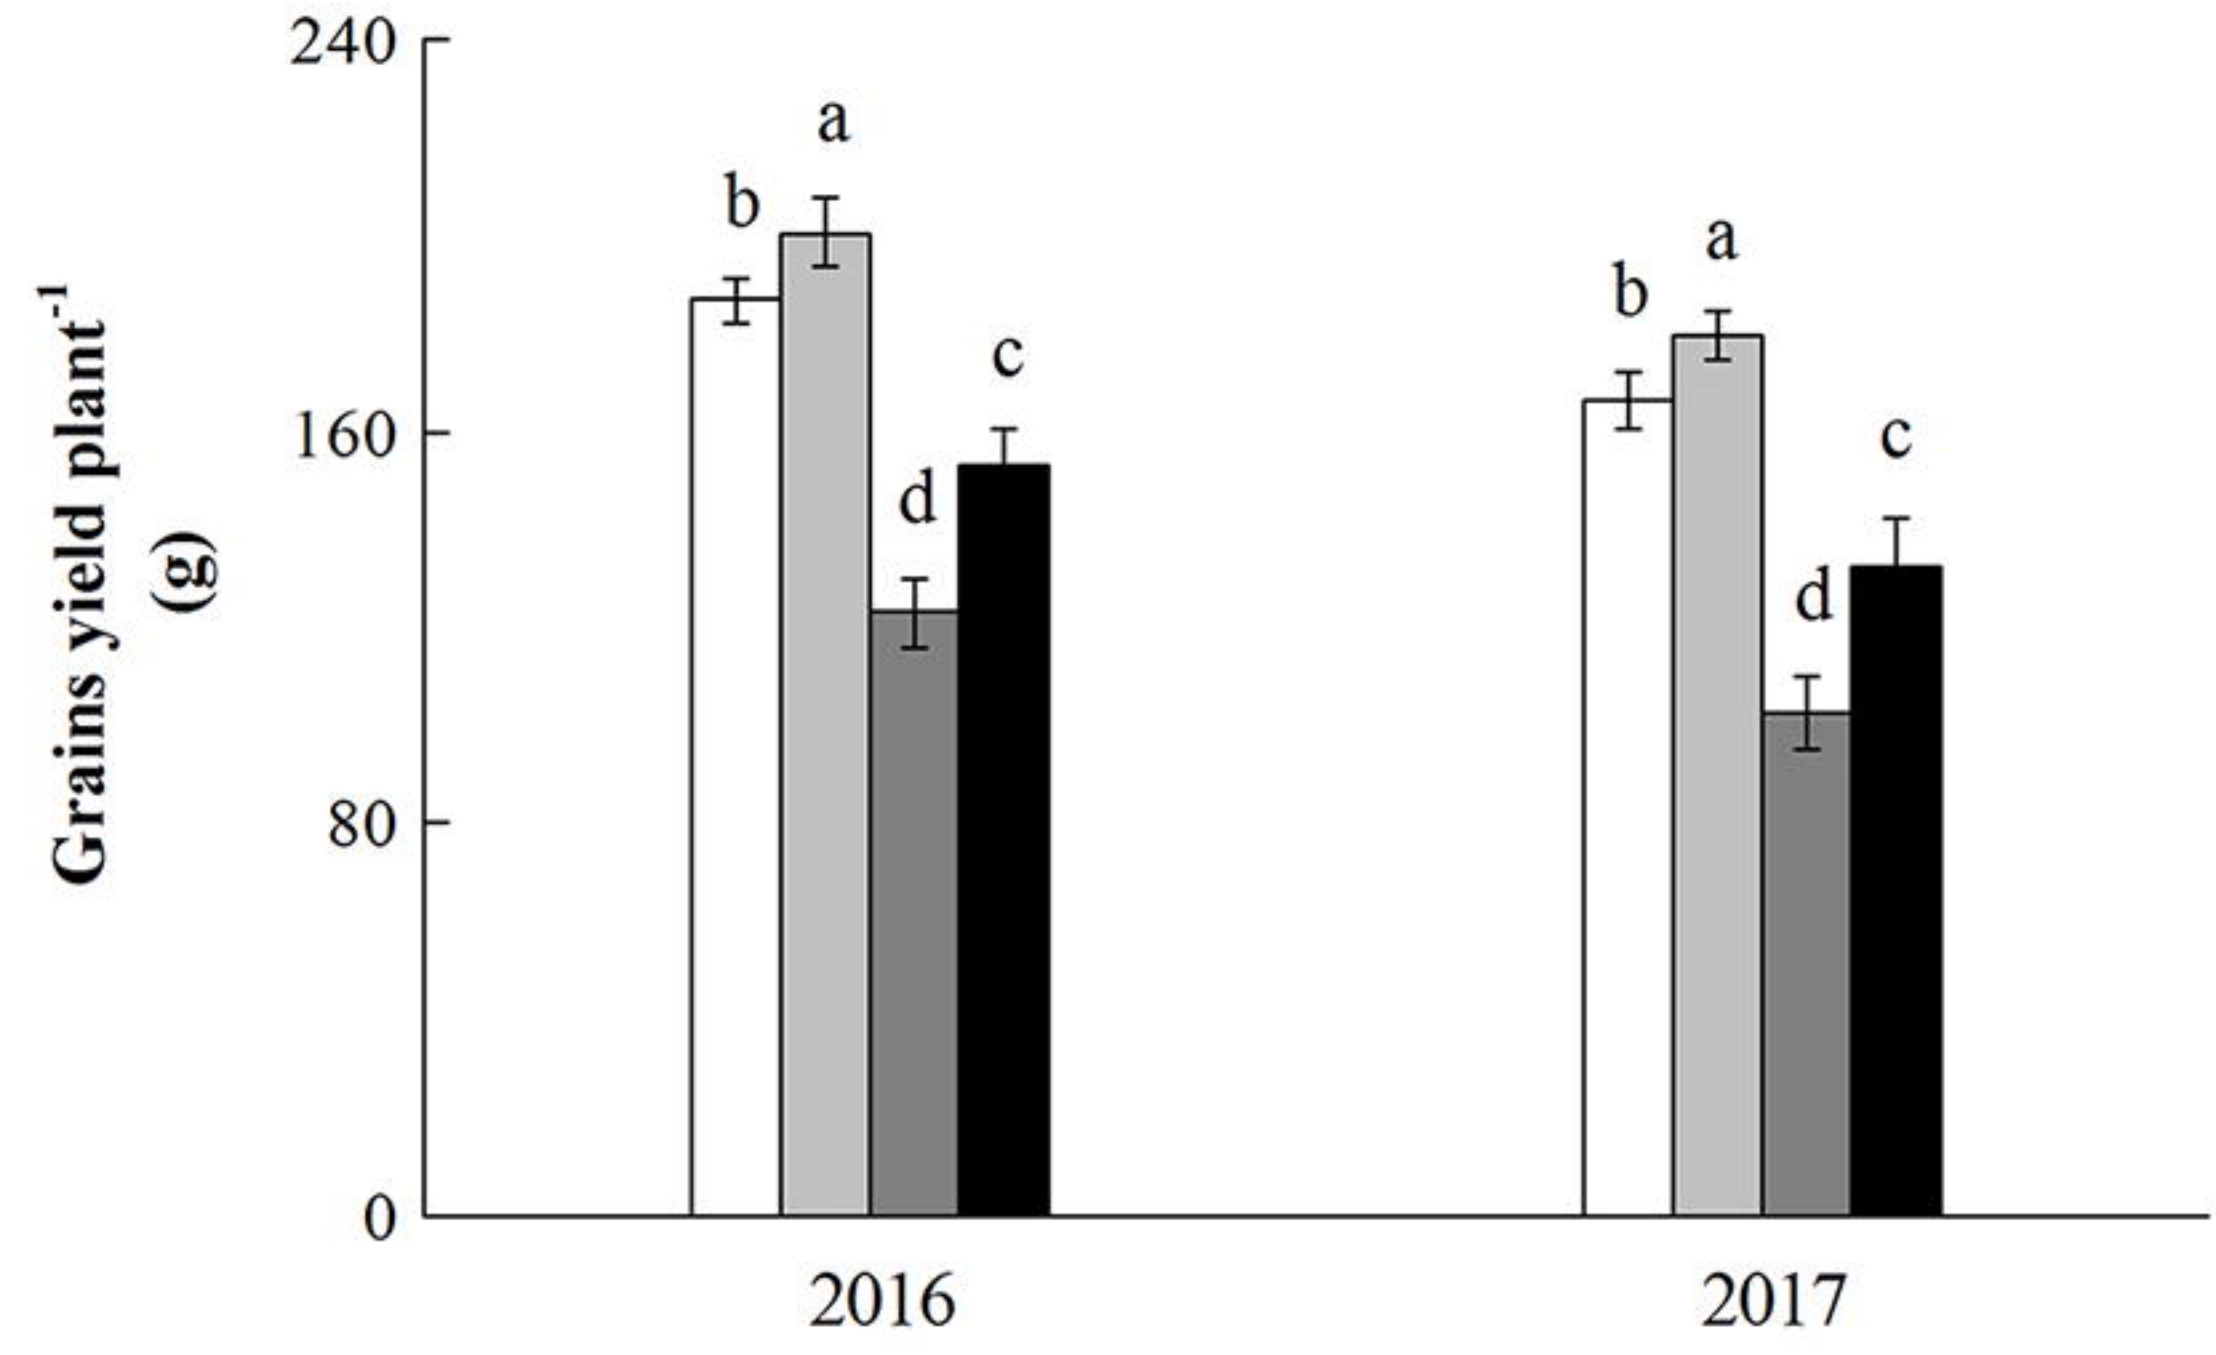



2016

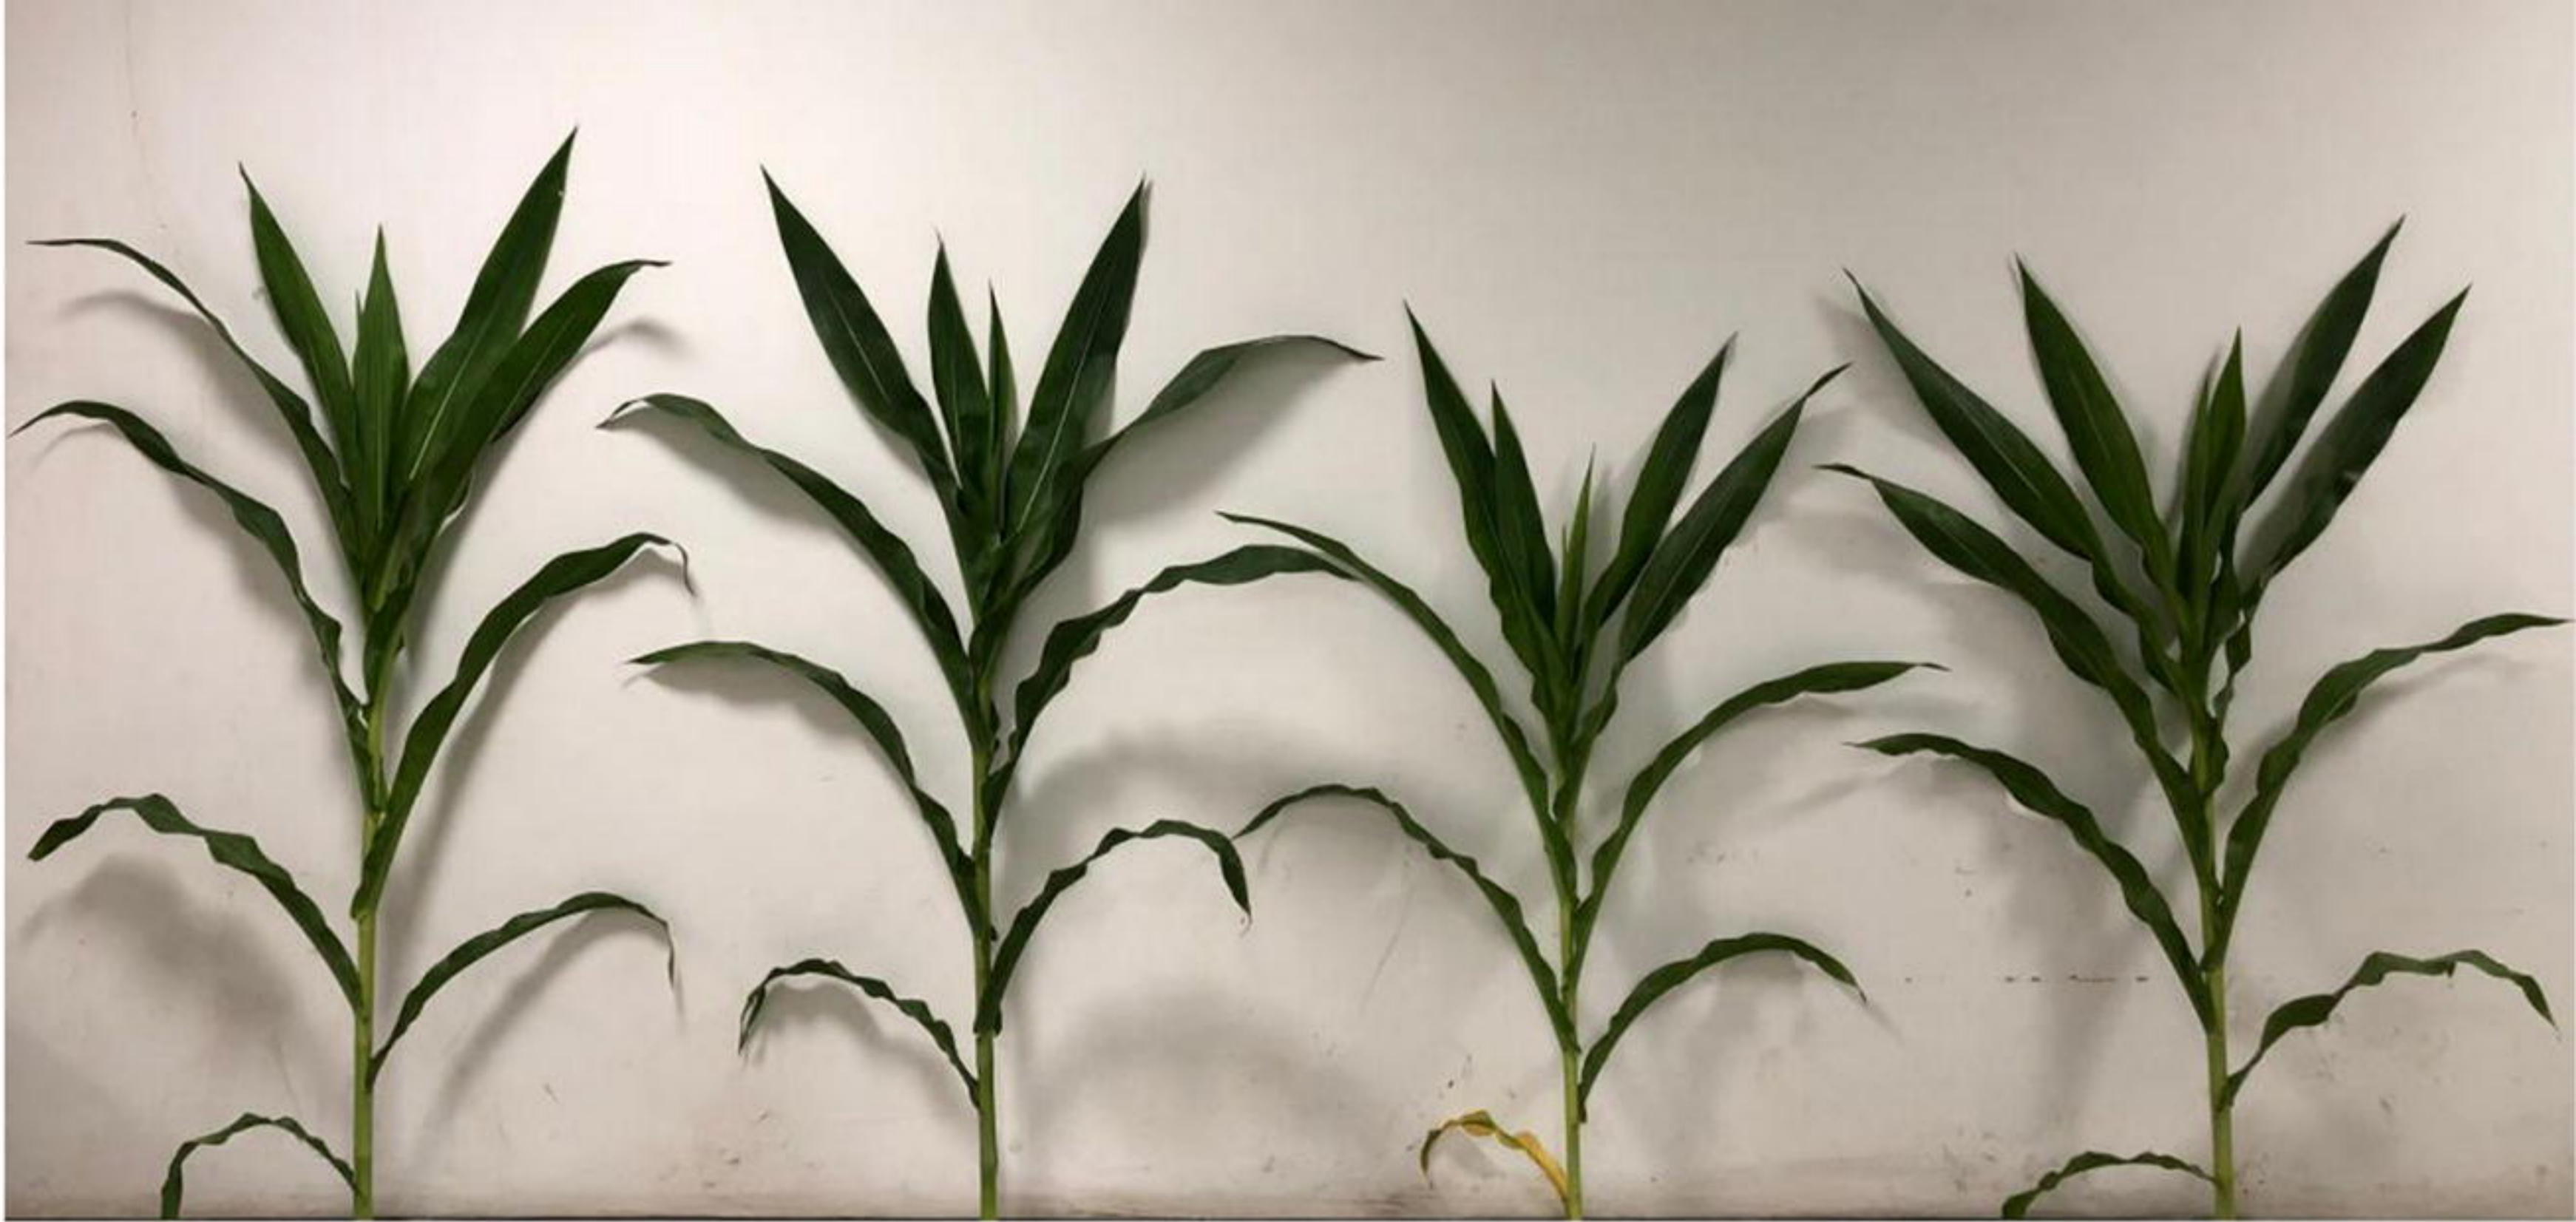

bioRxiv preprint doi: <https://doi.org/10.1101/385203>; this version posted August 4, 2018. The copyright holder for this preprint (which was not certified by peer review) is the author/funder, who has granted bioRxiv a license to display the preprint in perpetuity. It is made available under aCC-BY 4.0 International license.

2017

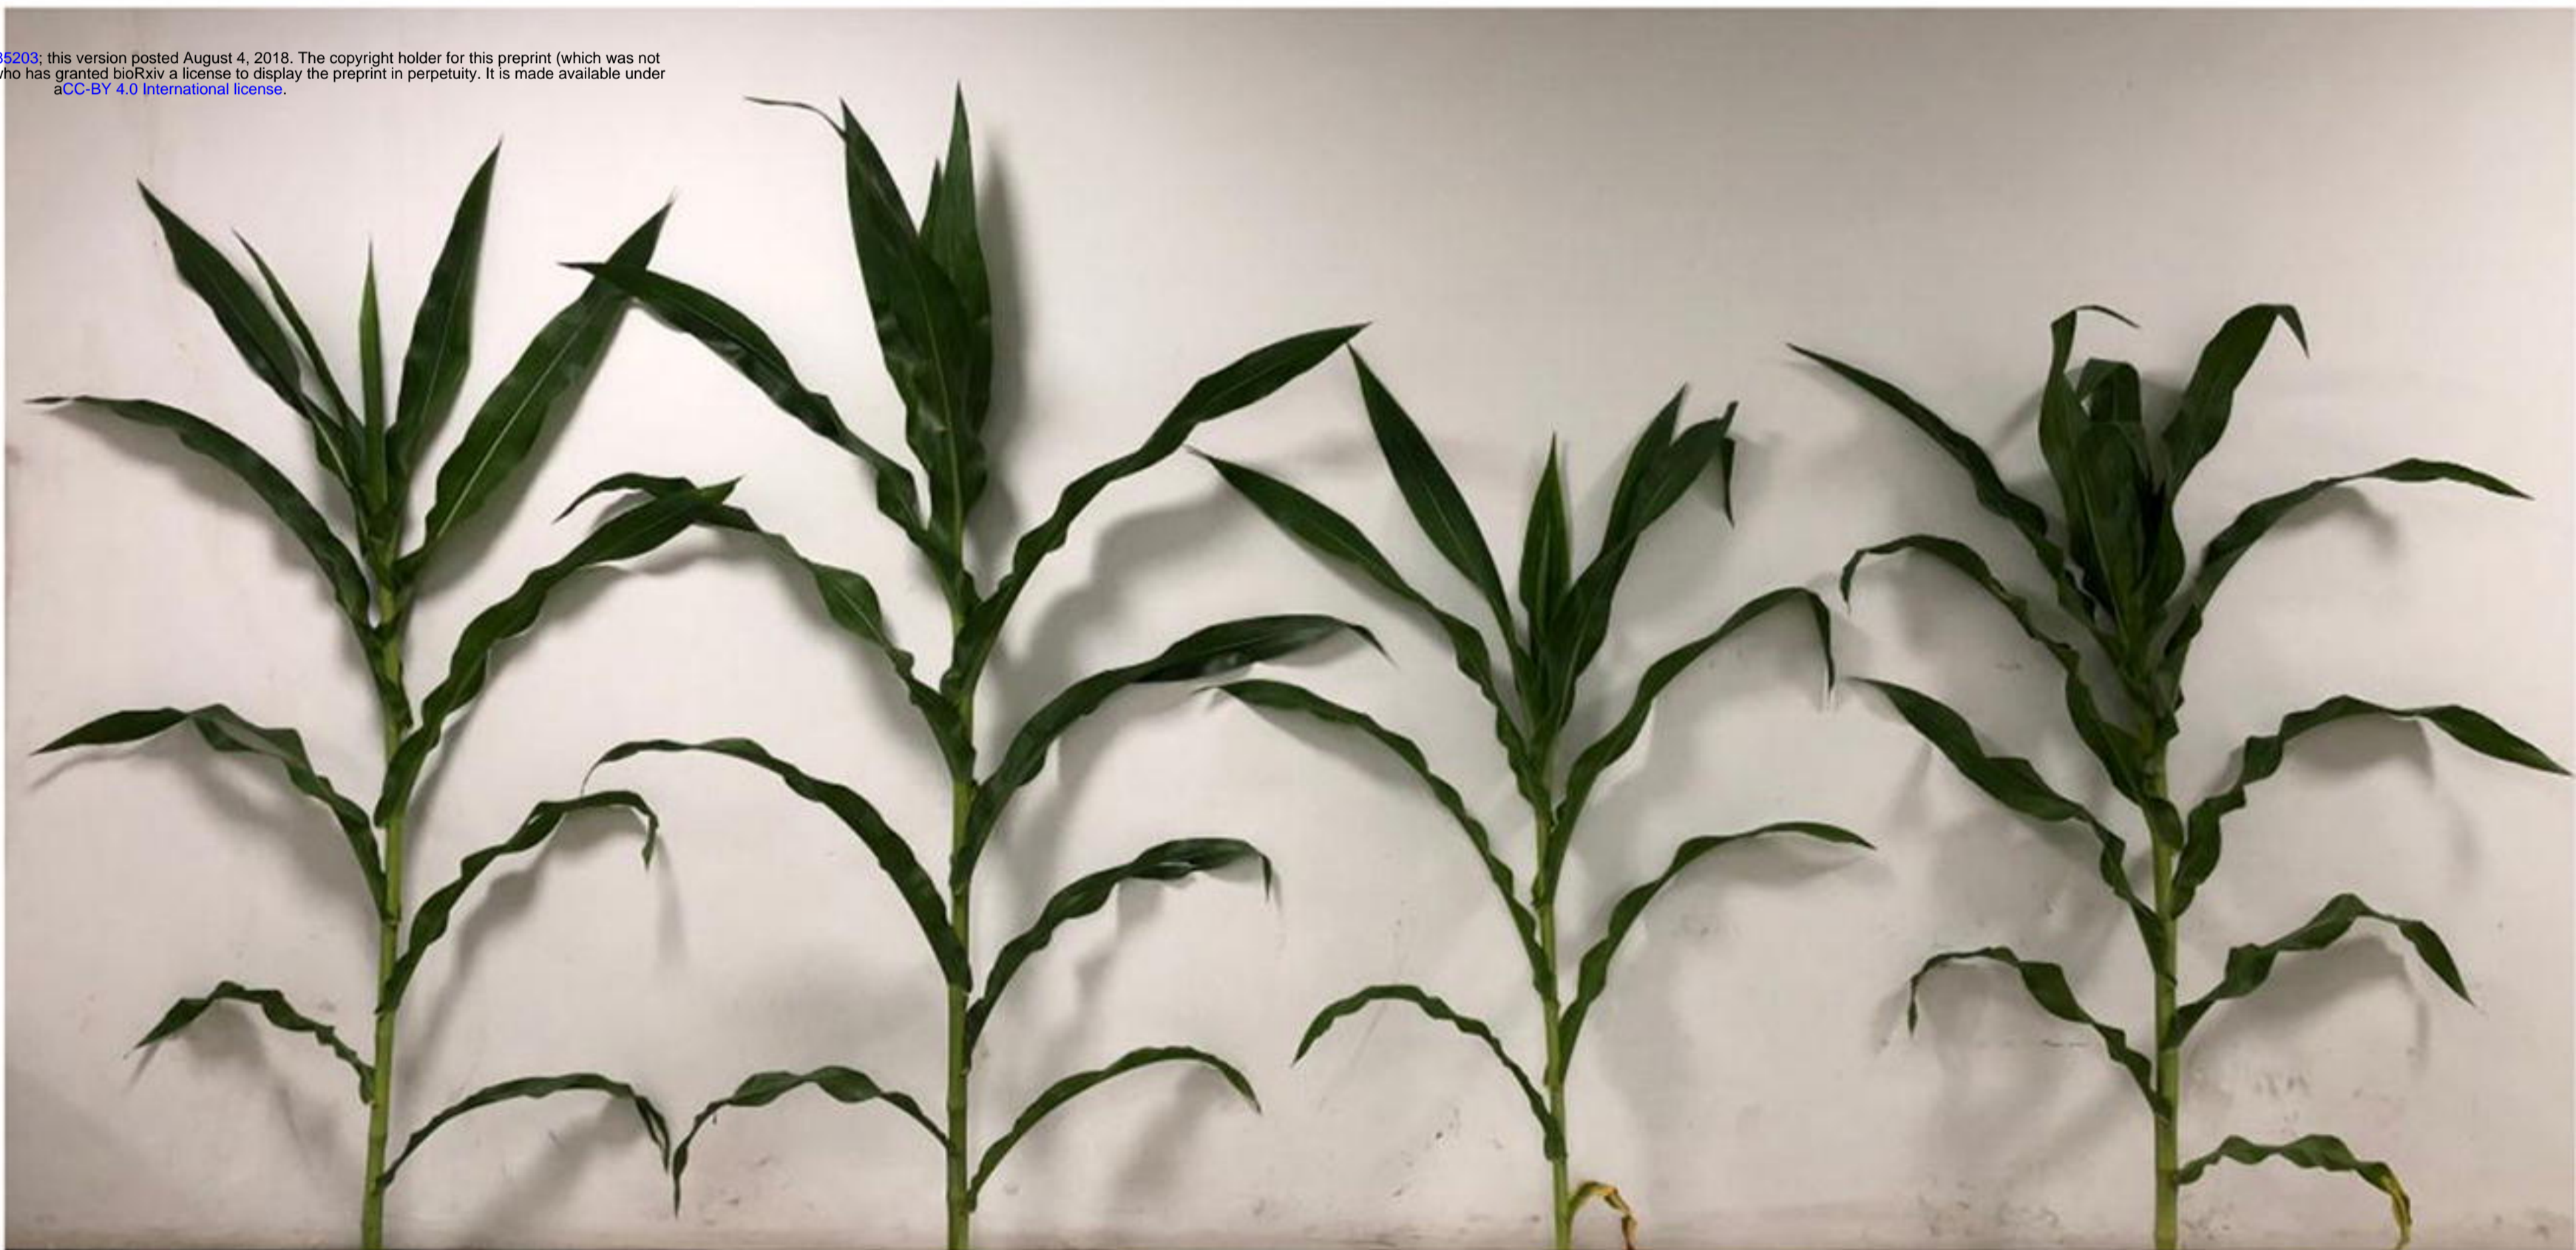

Well-watered

Well-watered  
+DCPTA

Drought

Drought  
+DCPTA

Well-watered Well-watered+DCPTA Drought Drought +DCPTA

2016

2017

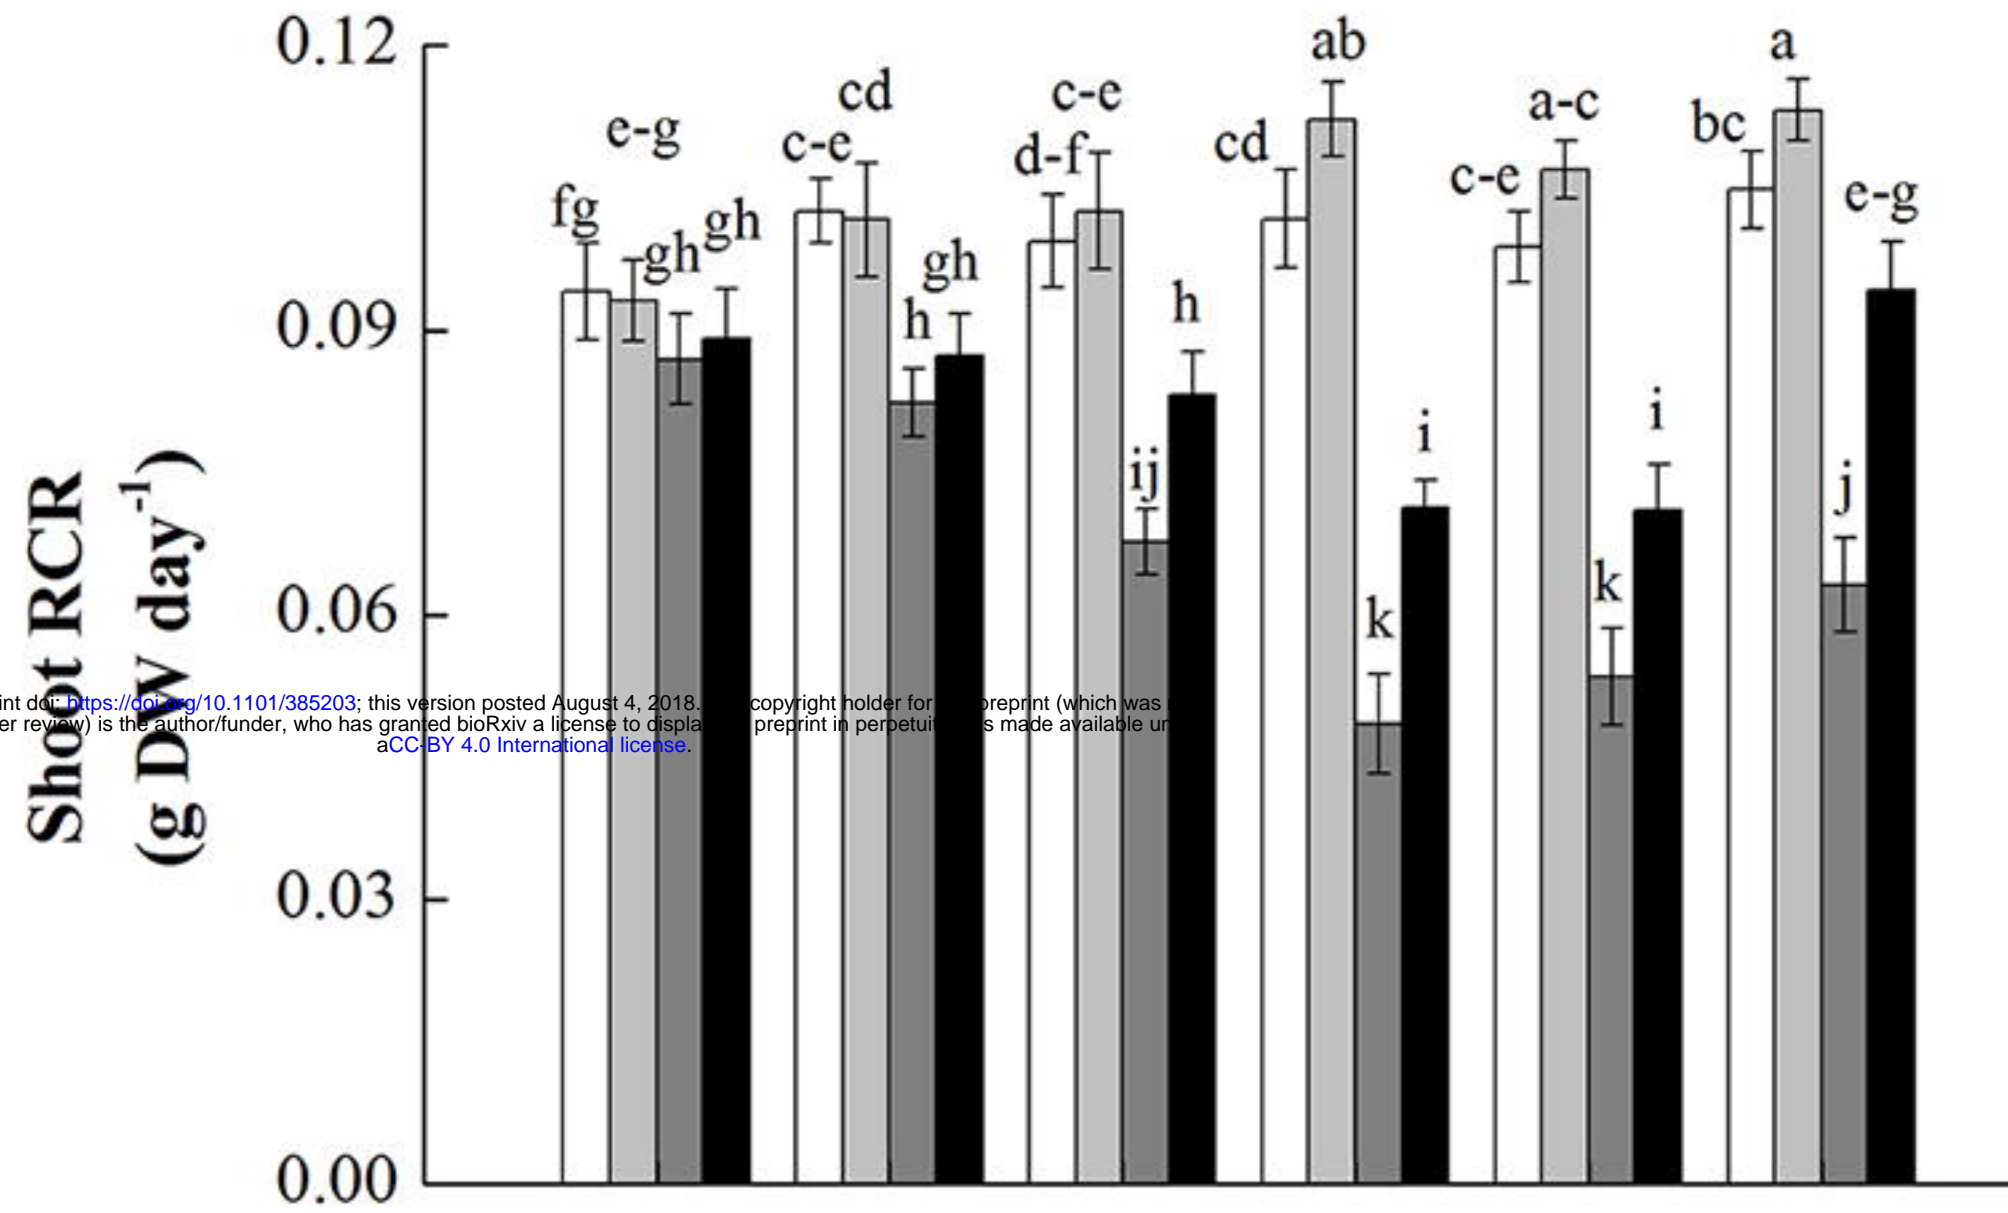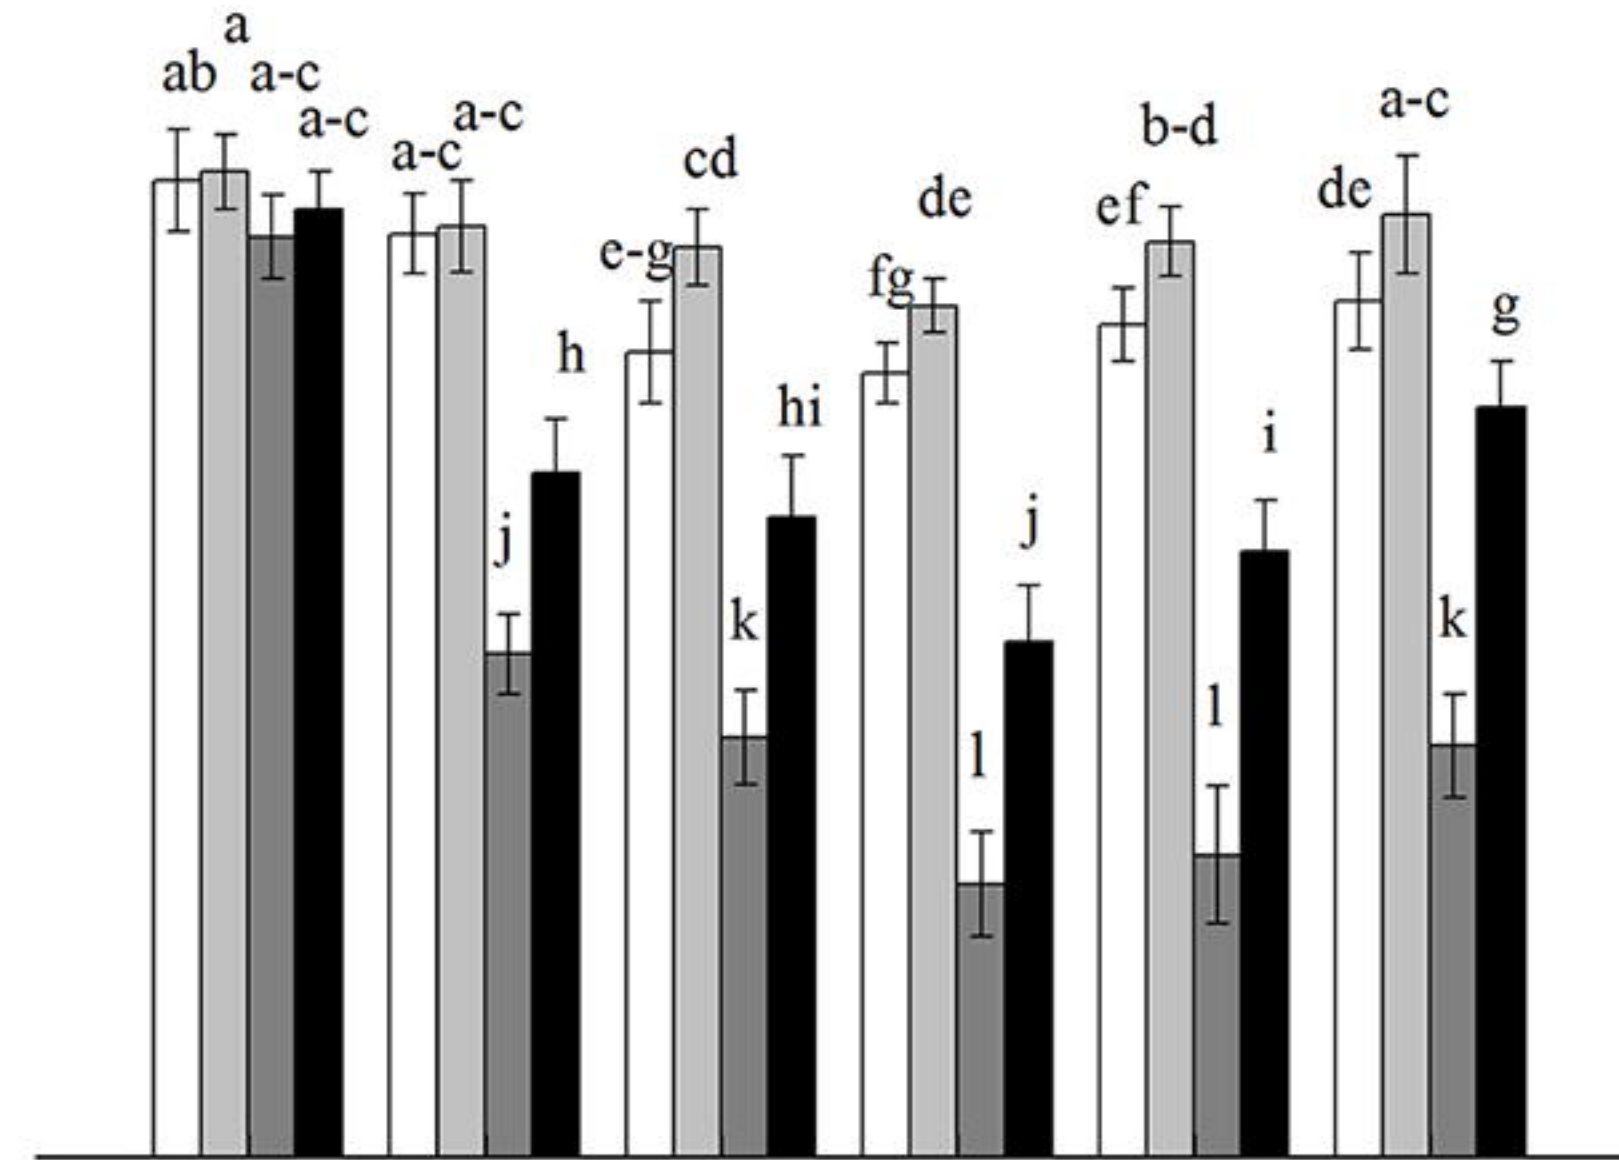

bioRxiv preprint doi: <https://doi.org/10.1101/385203>; this version posted August 4, 2018. The copyright holder for this preprint (which was not certified by peer review) is the author/funder, who has granted bioRxiv a license to display the preprint in perpetuity. It is made available under aCC-BY 4.0 International license.

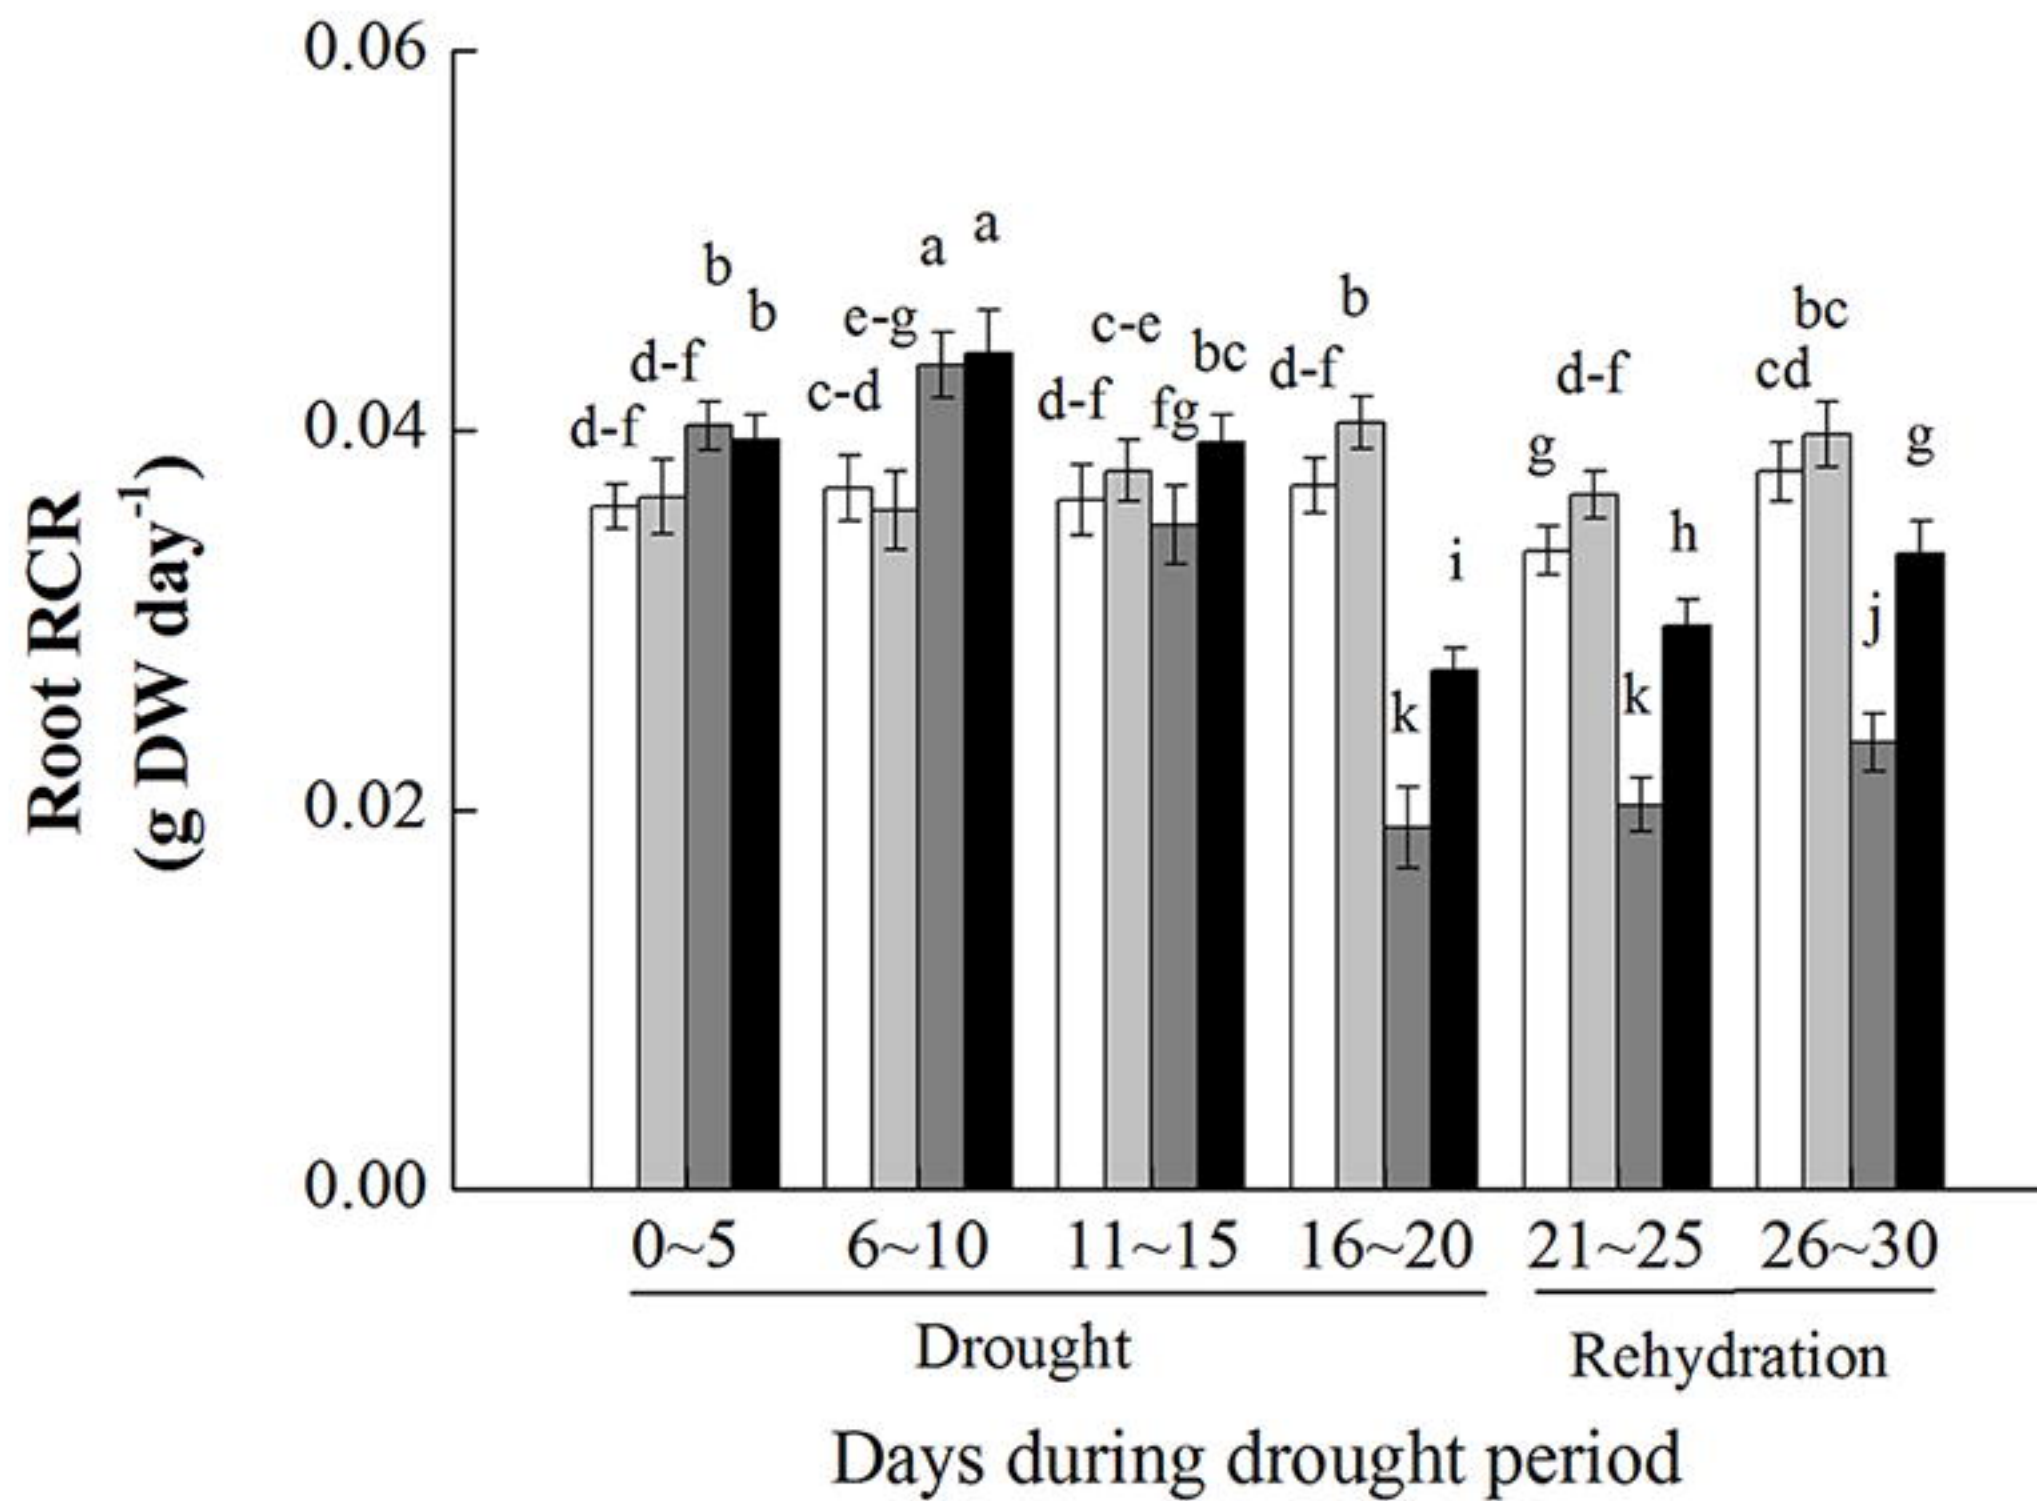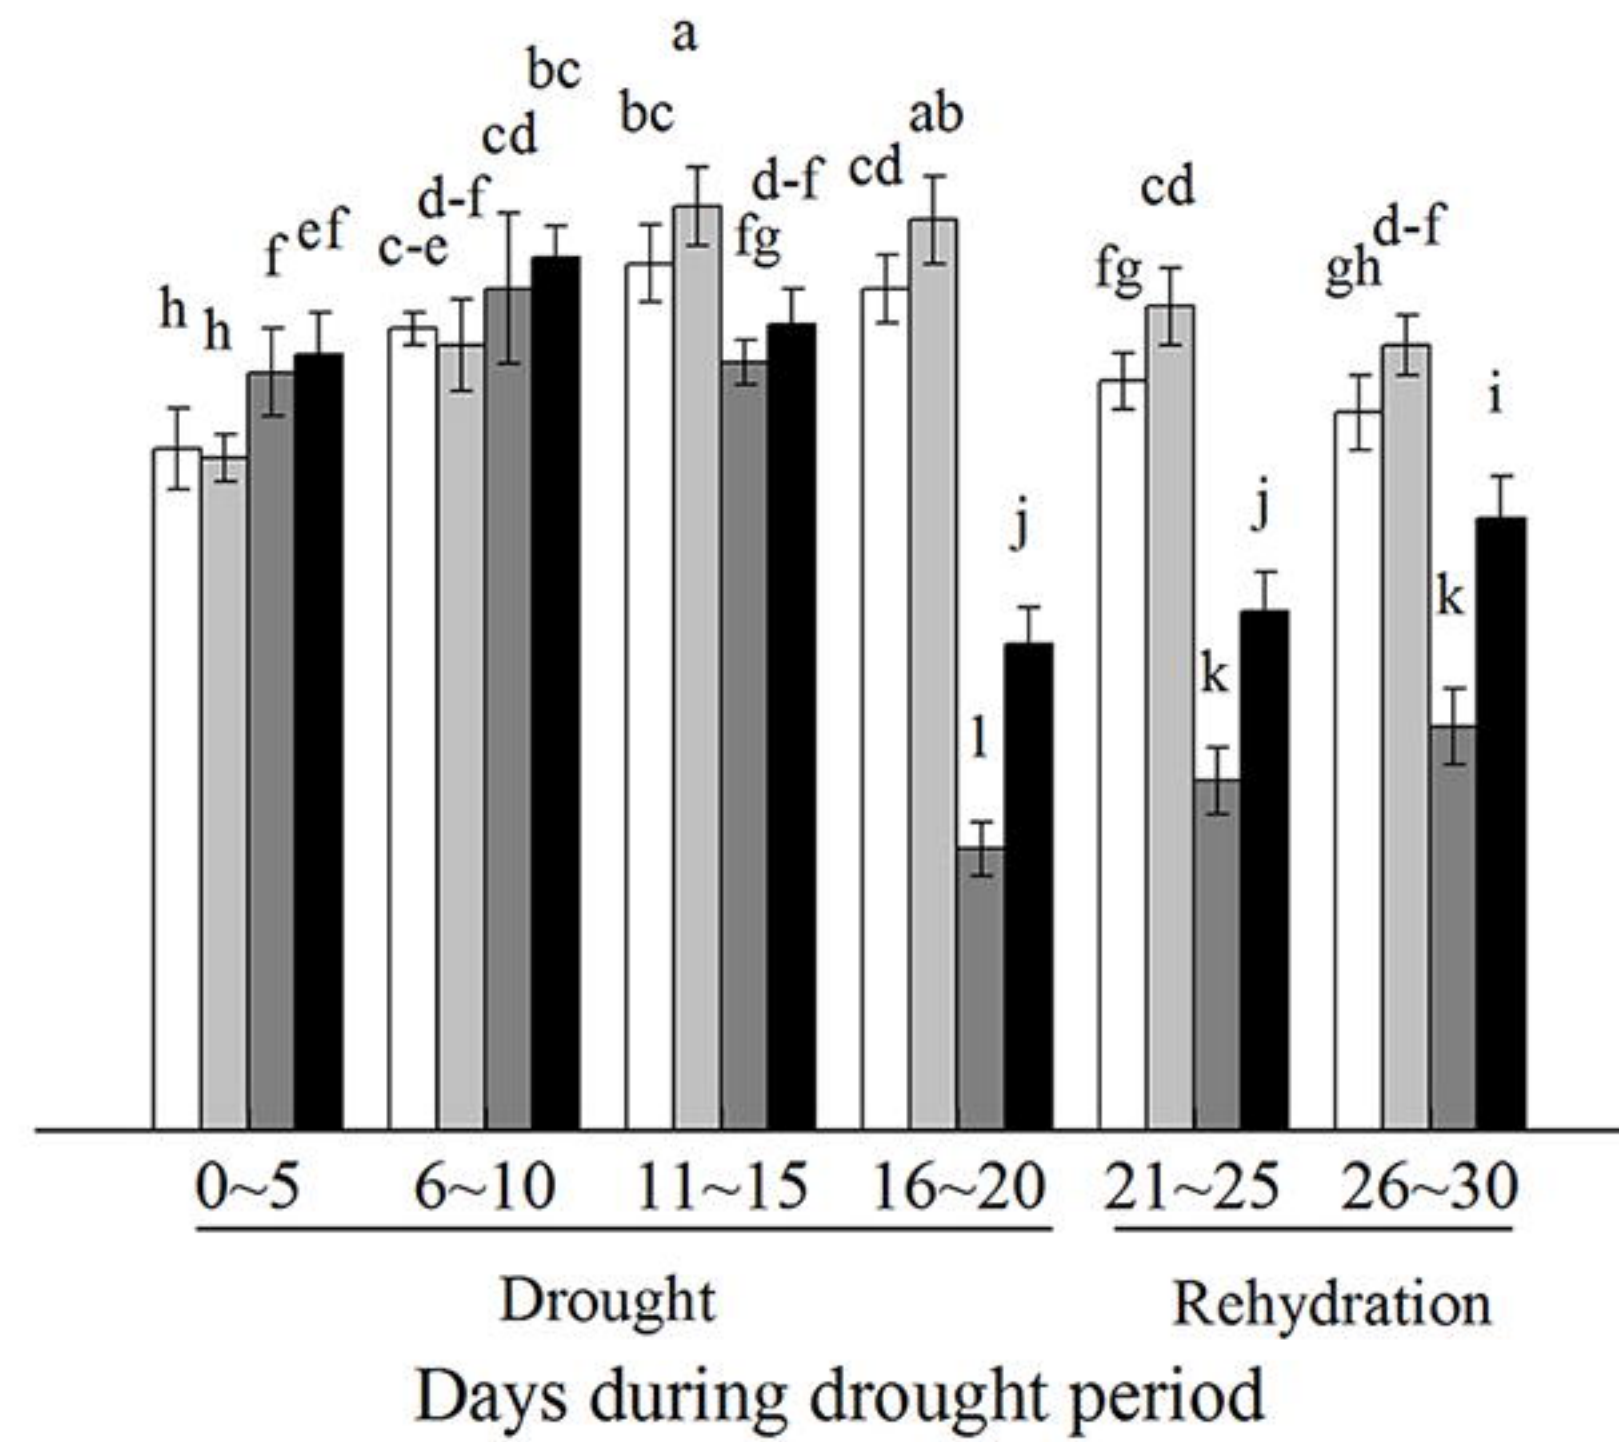

■ Well-watered    □ Well-watered+DCPTA    ▲ Drought    ▼ Drought+DCPTA

2016

2017

20 day after treatment

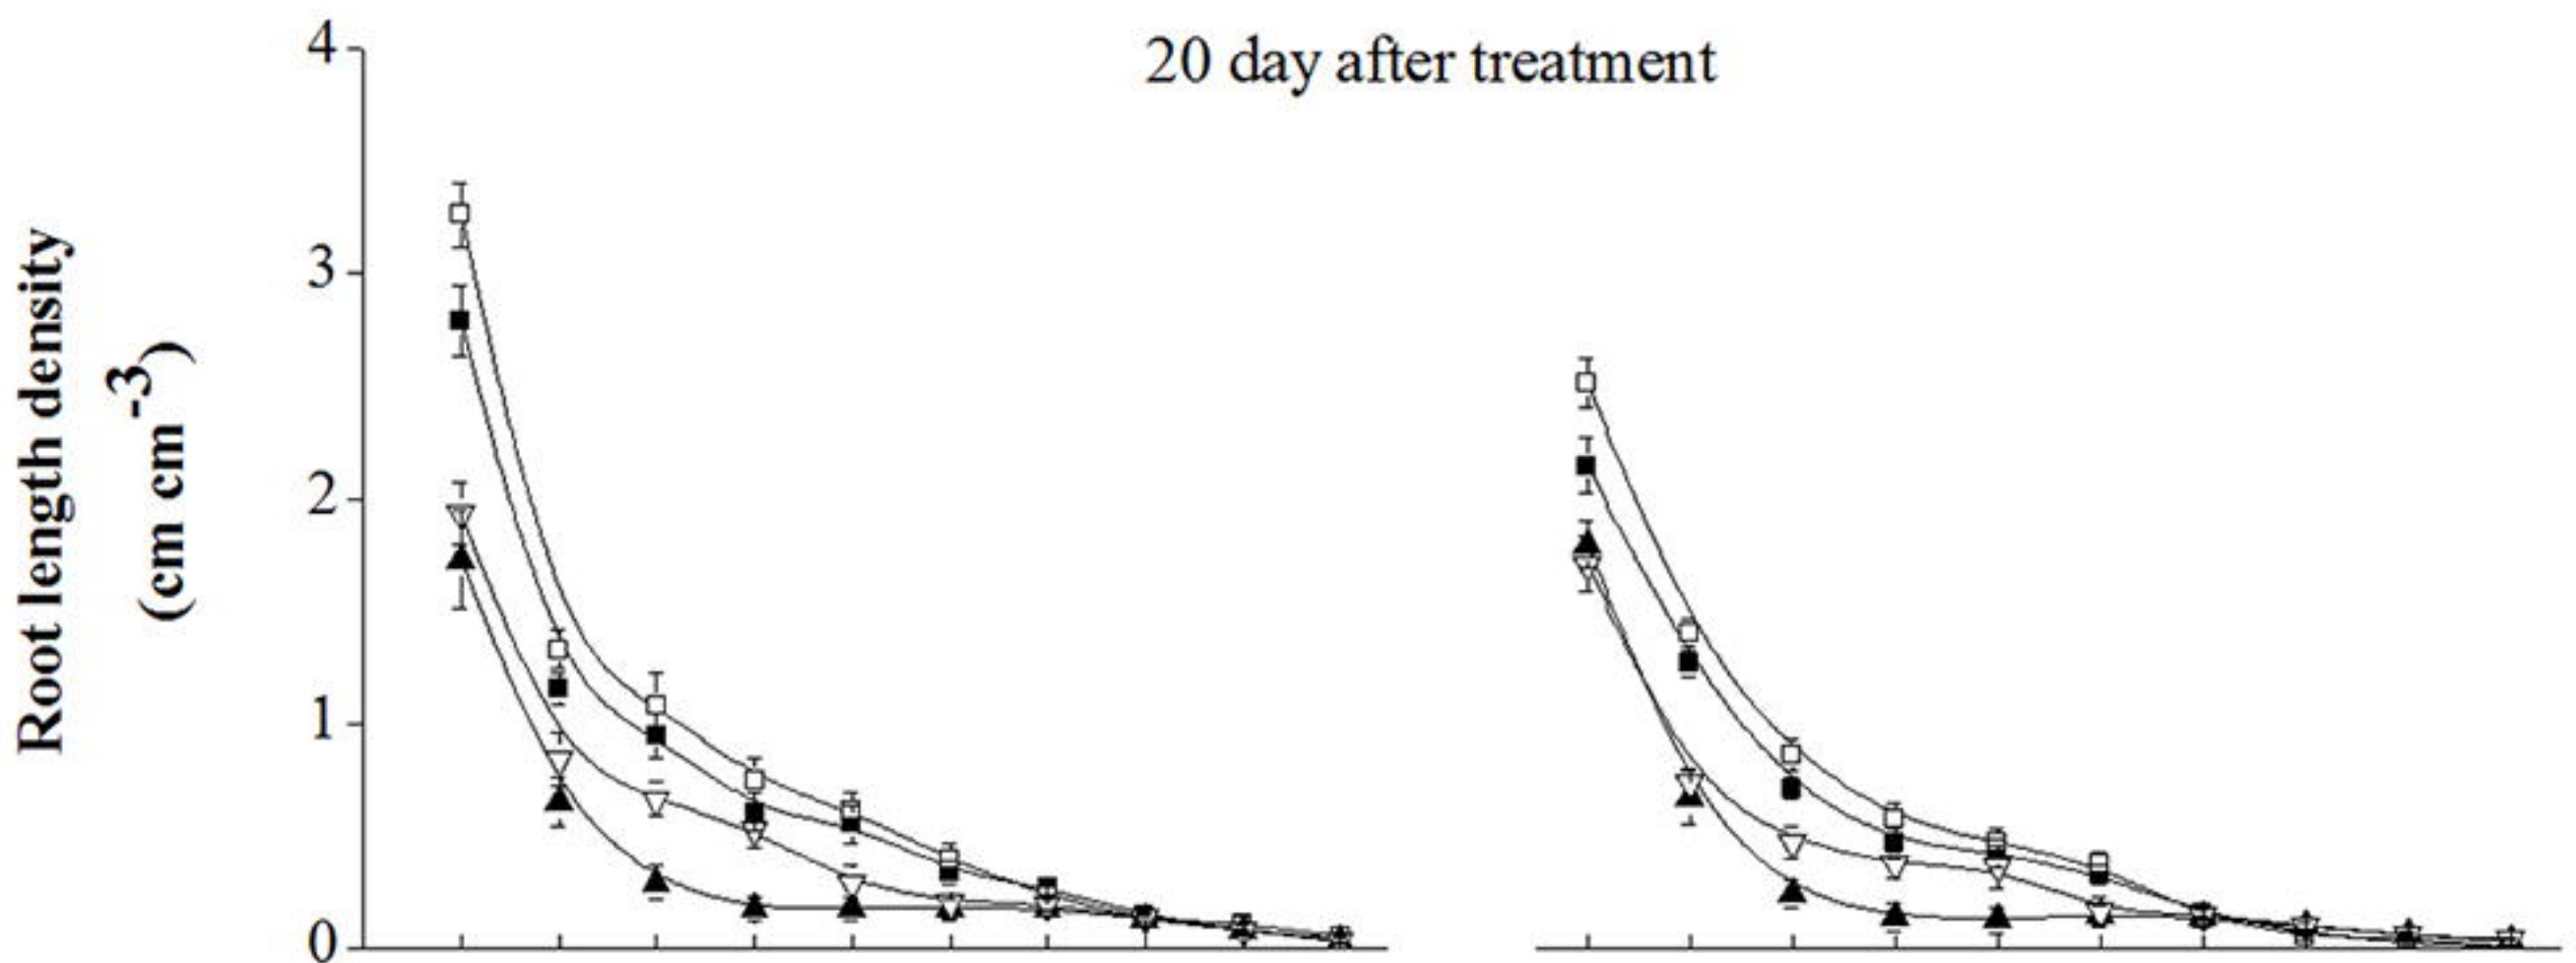

30 day after treatment

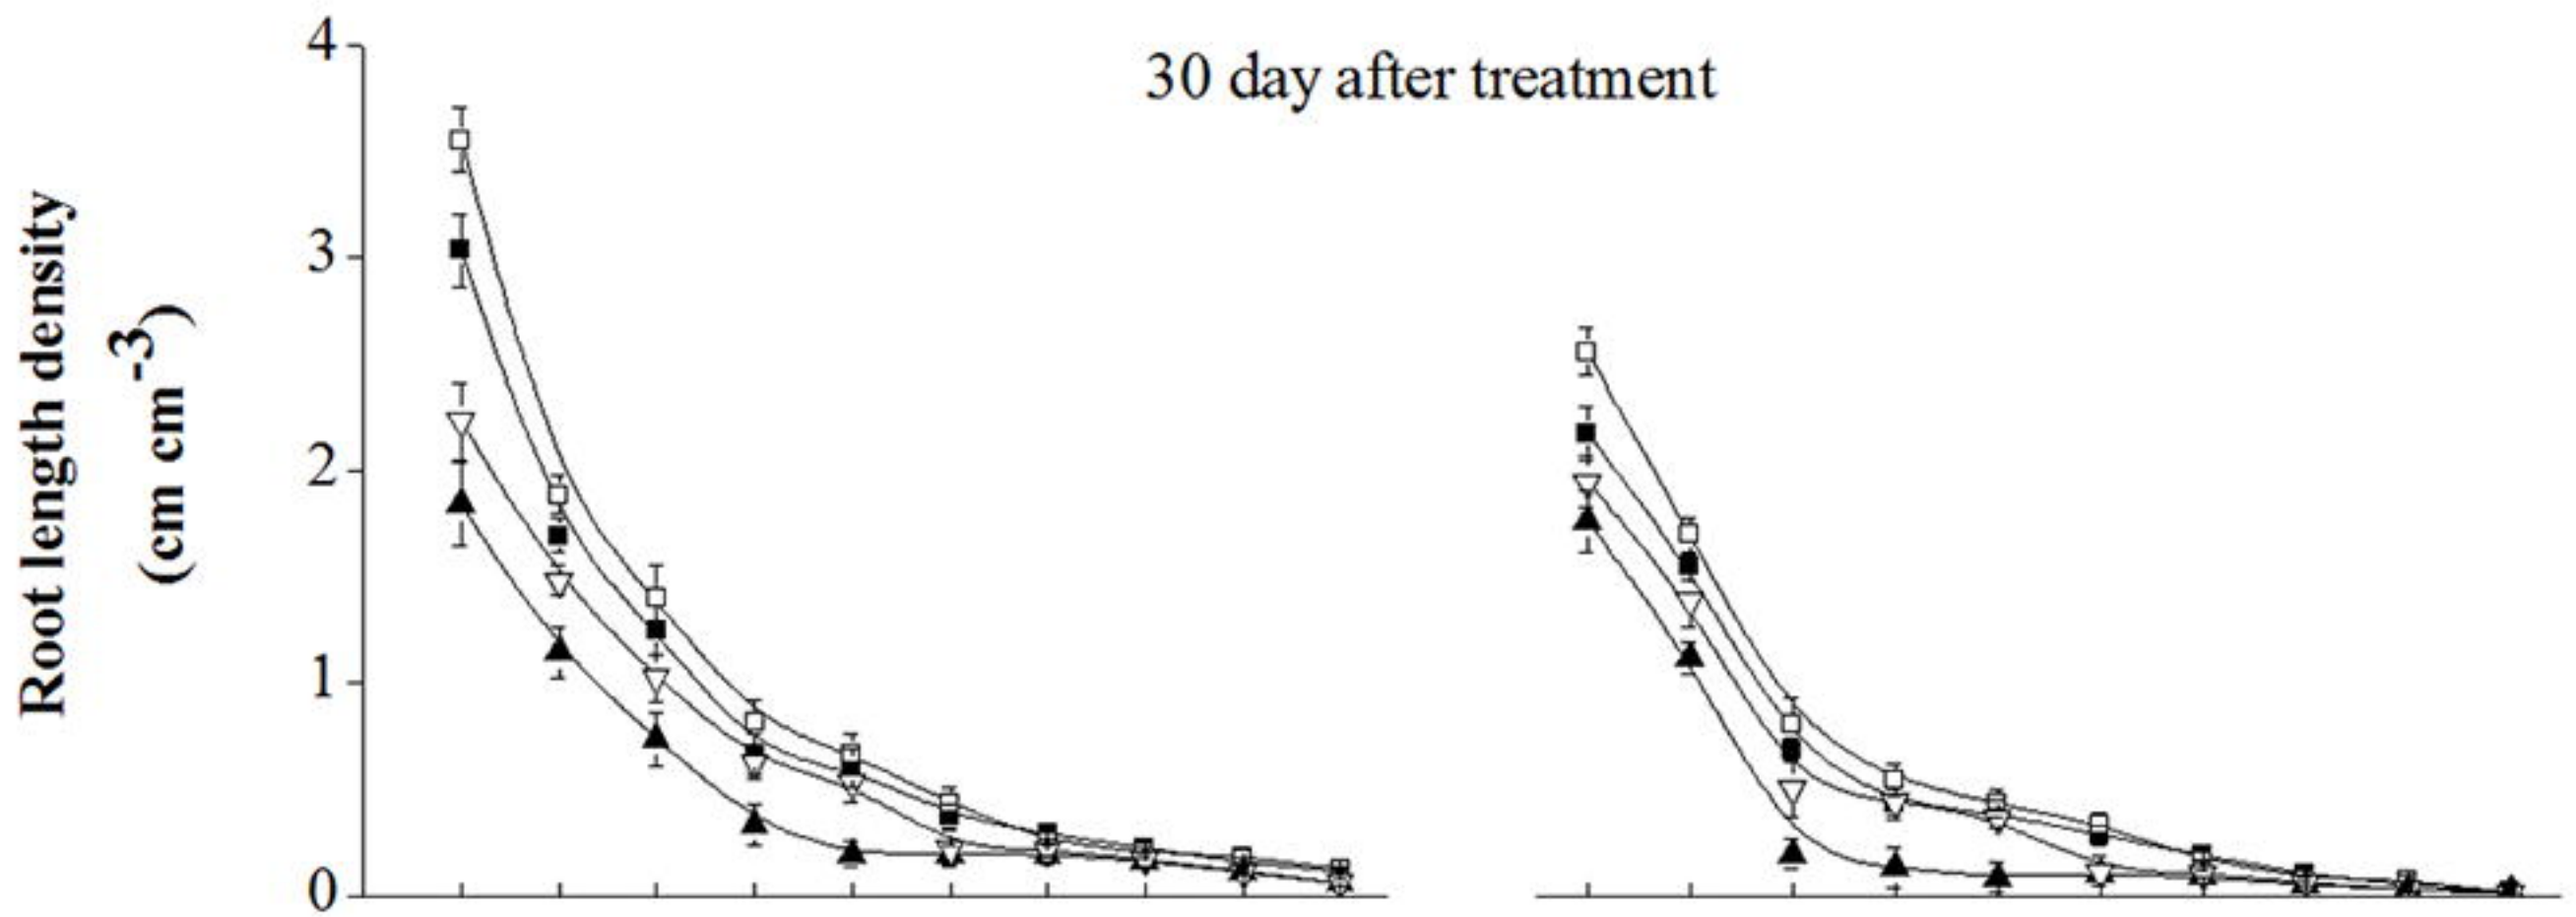

20 day after treatment

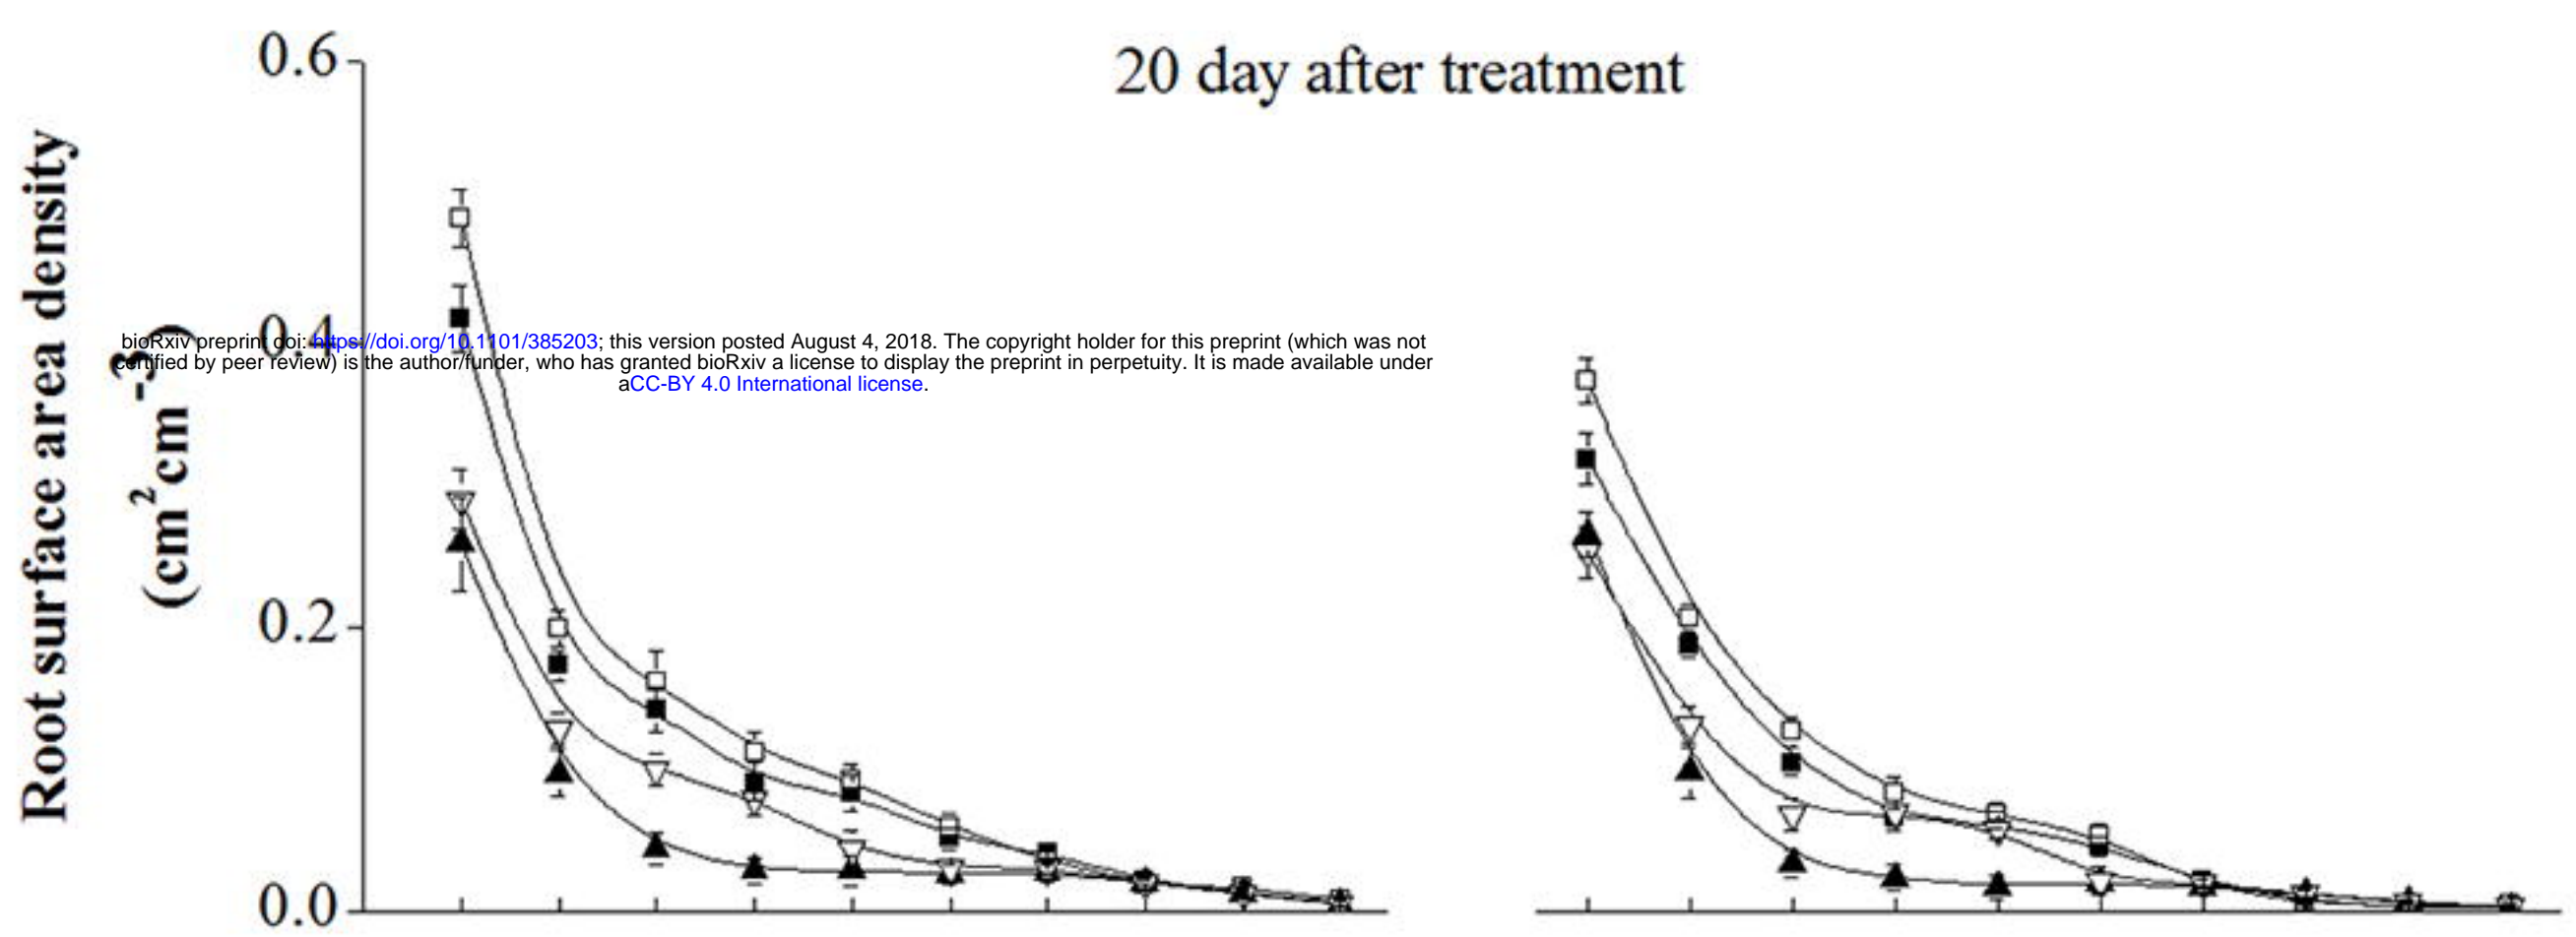

30 day after treatment

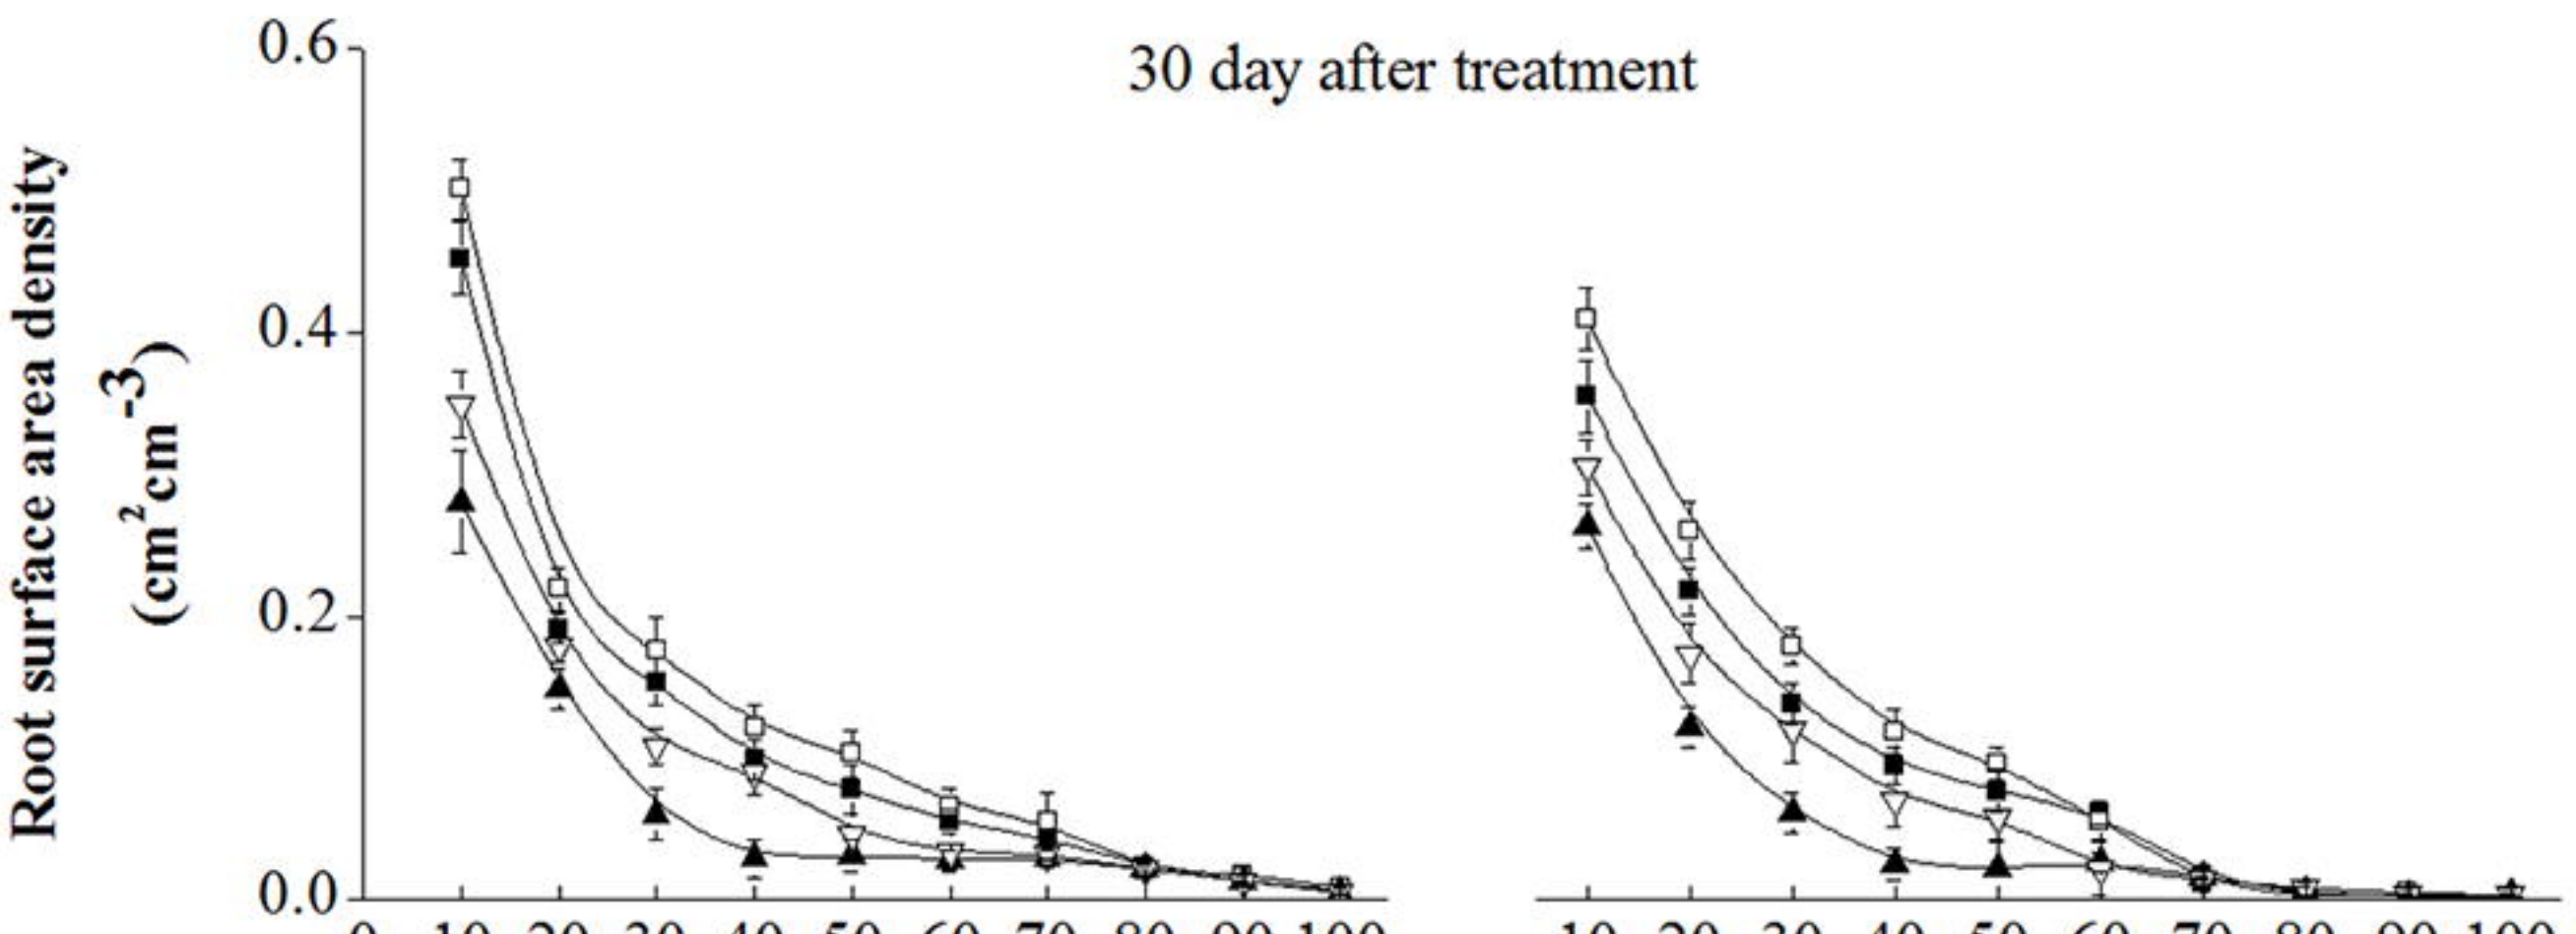

Soil depth  
(cm)

Soil depth  
(cm)

bioRxiv preprint doi: <https://doi.org/10.1101/385203>; this version posted August 4, 2018. The copyright holder for this preprint (which was not certified by peer review) is the author/funder, who has granted bioRxiv a license to display the preprint in perpetuity. It is made available under aCC-BY 4.0 International license.

2016

2017

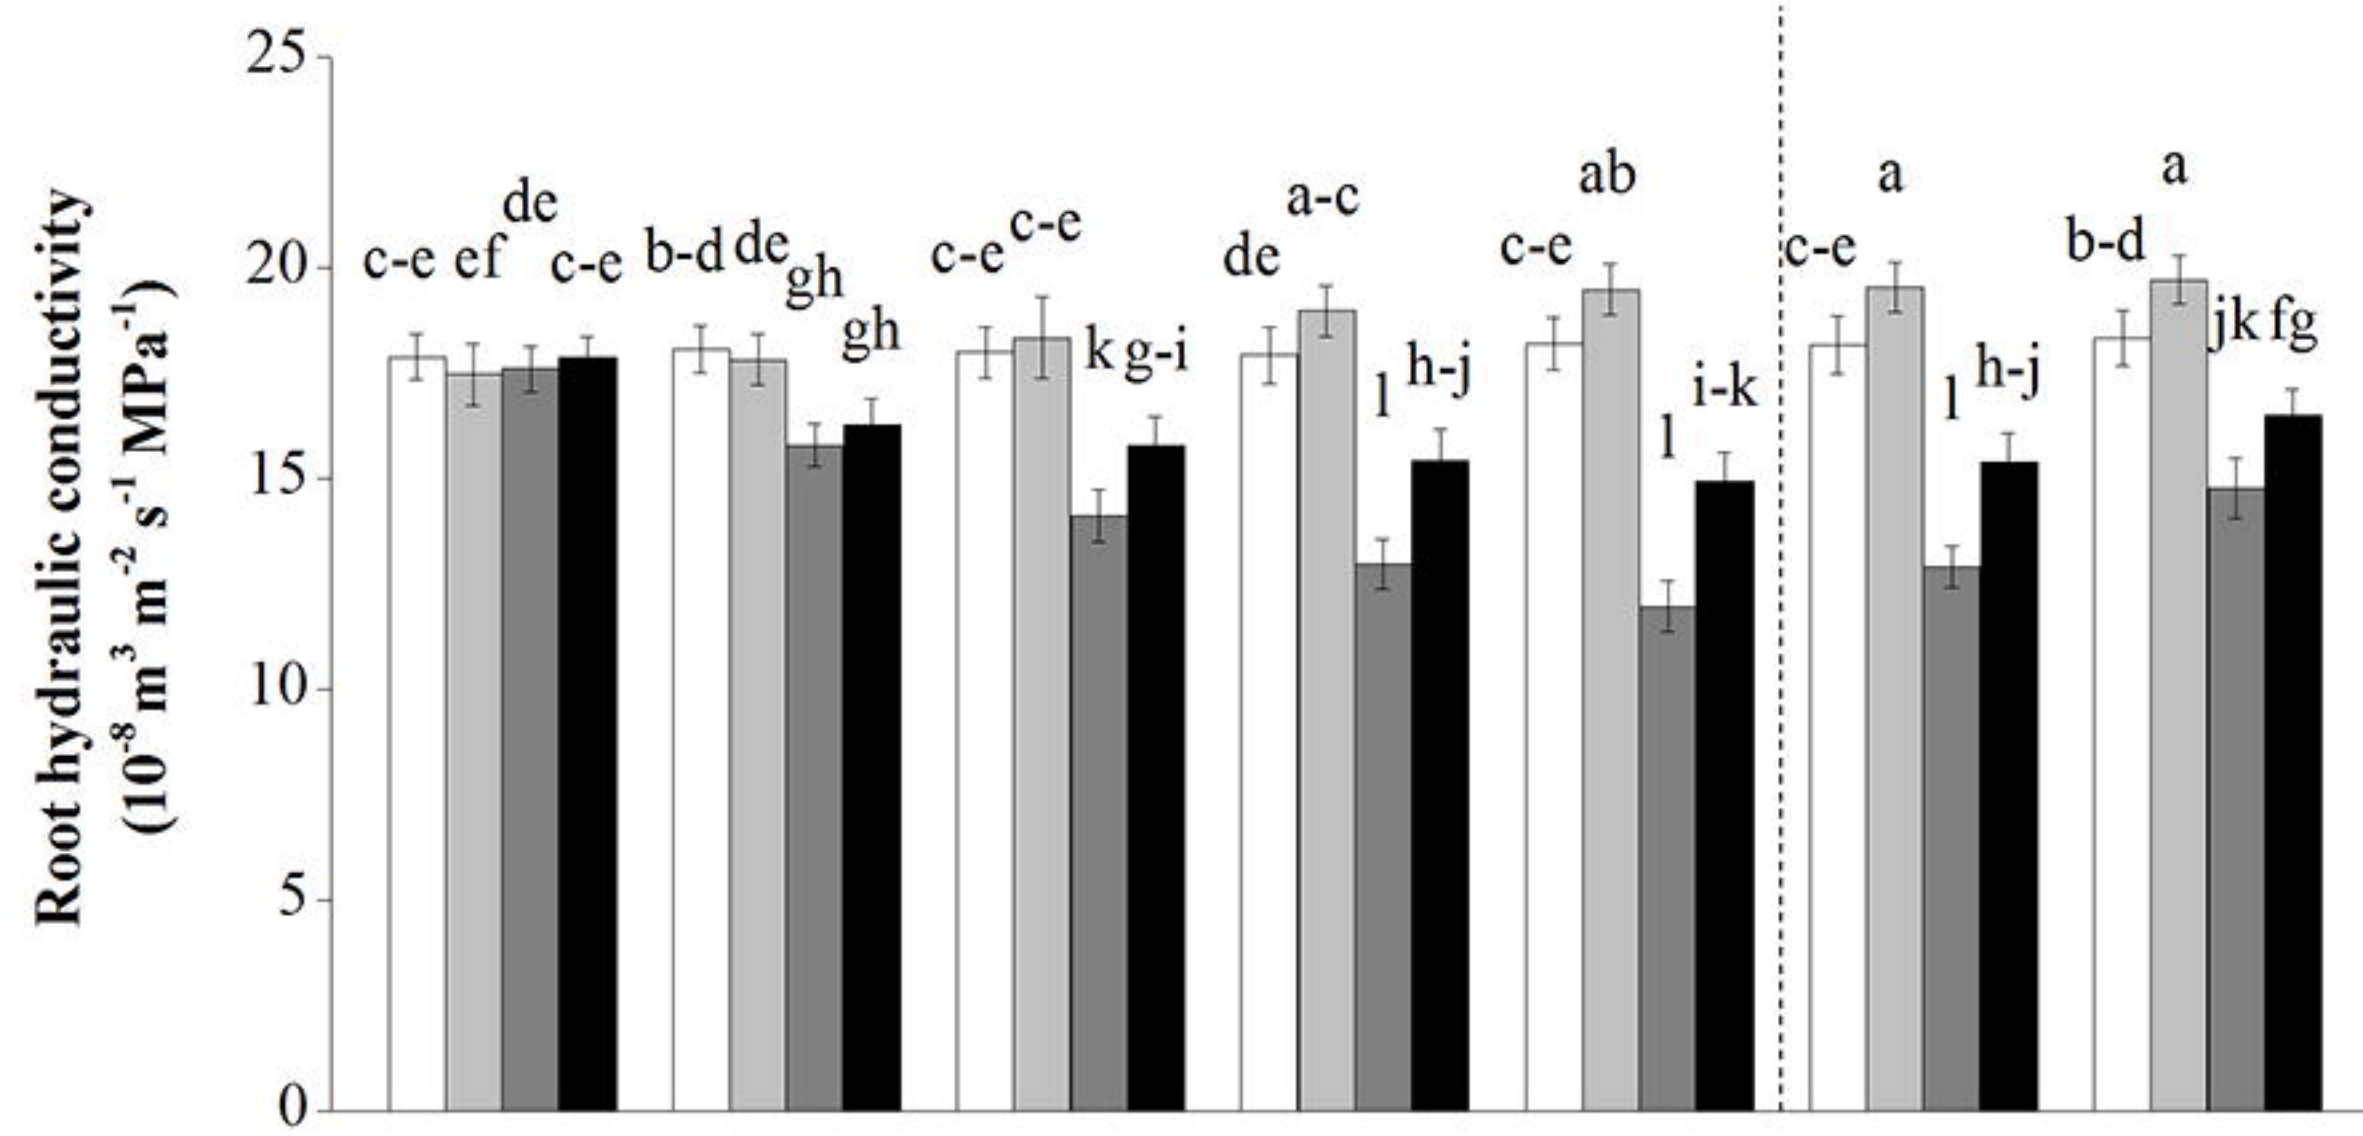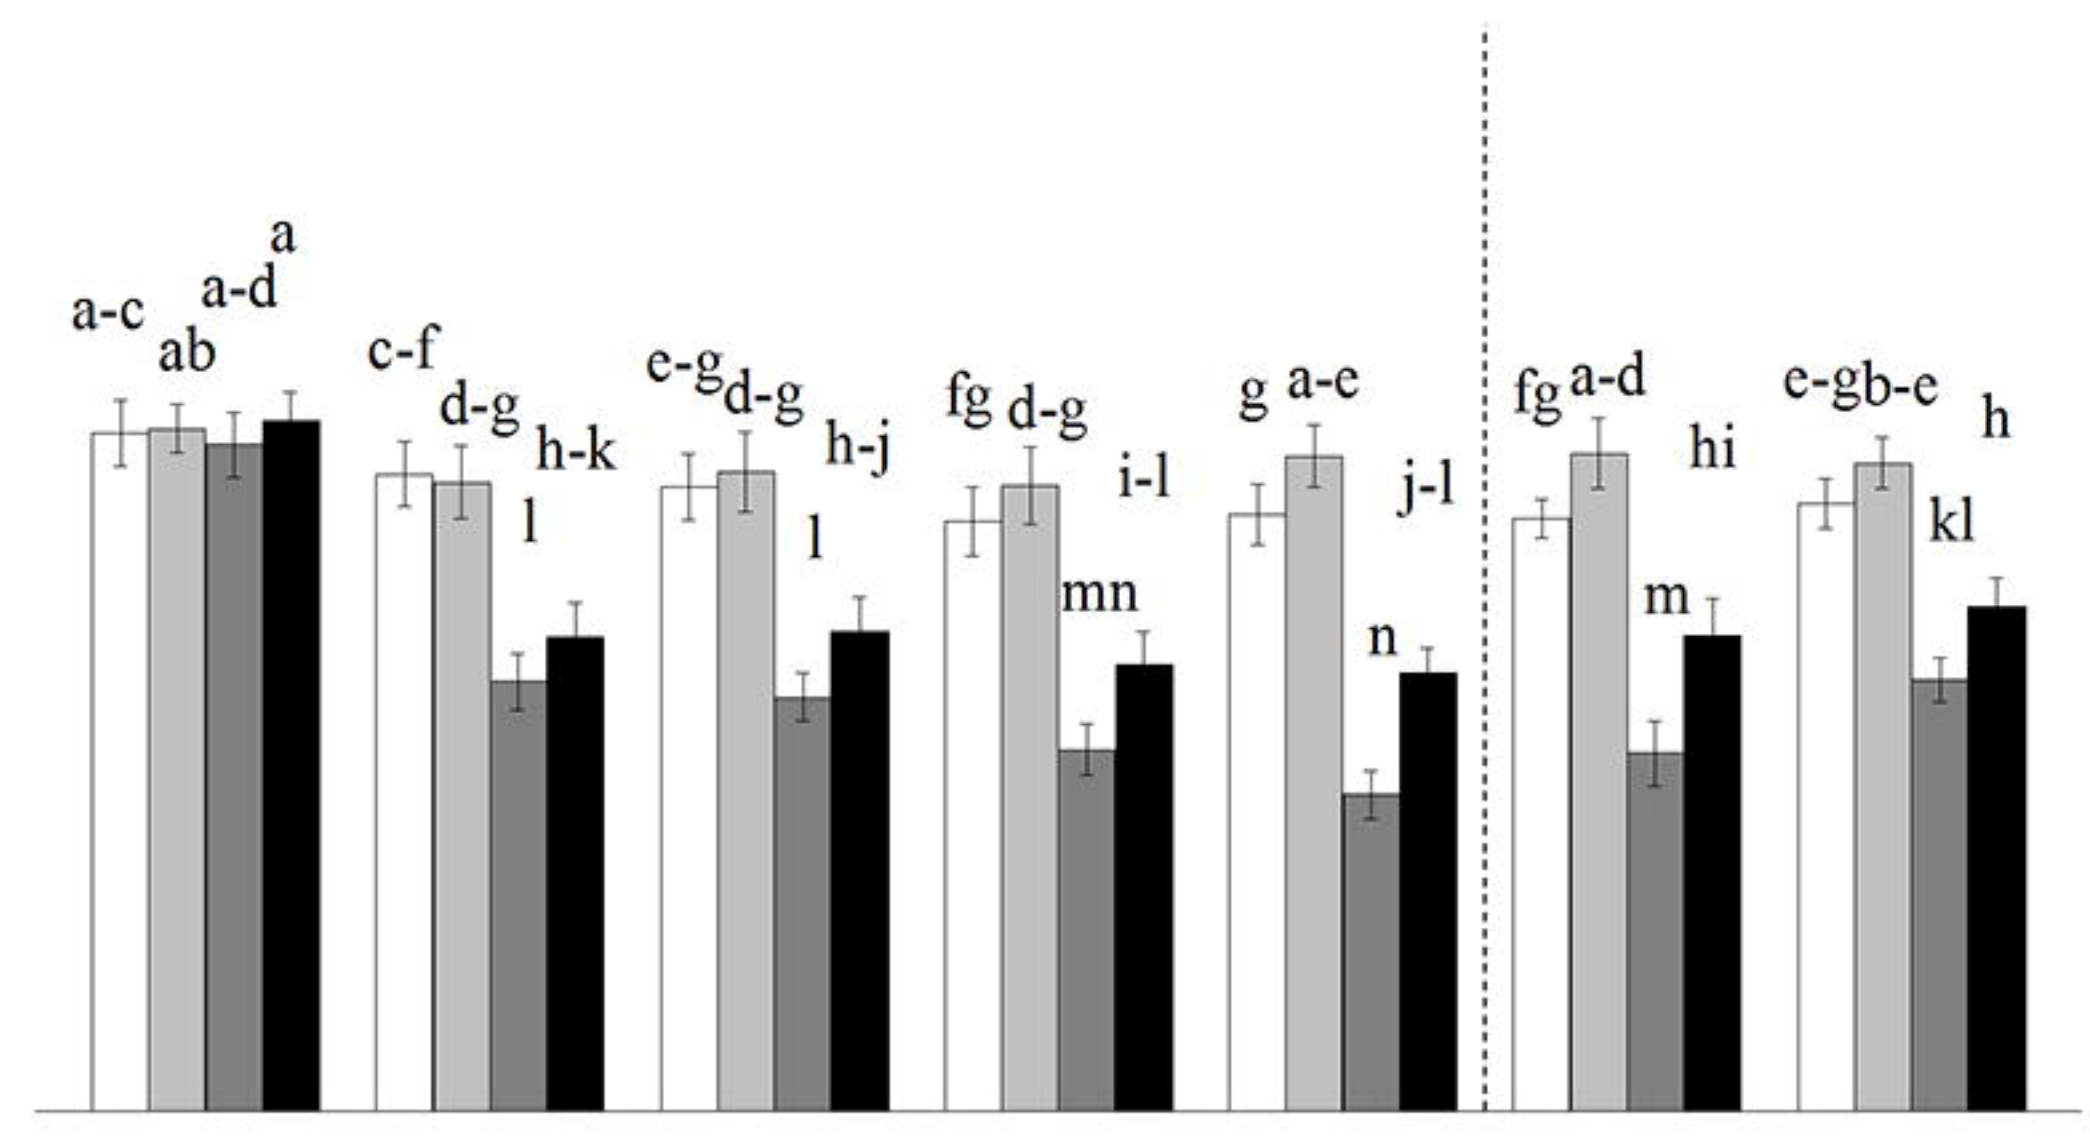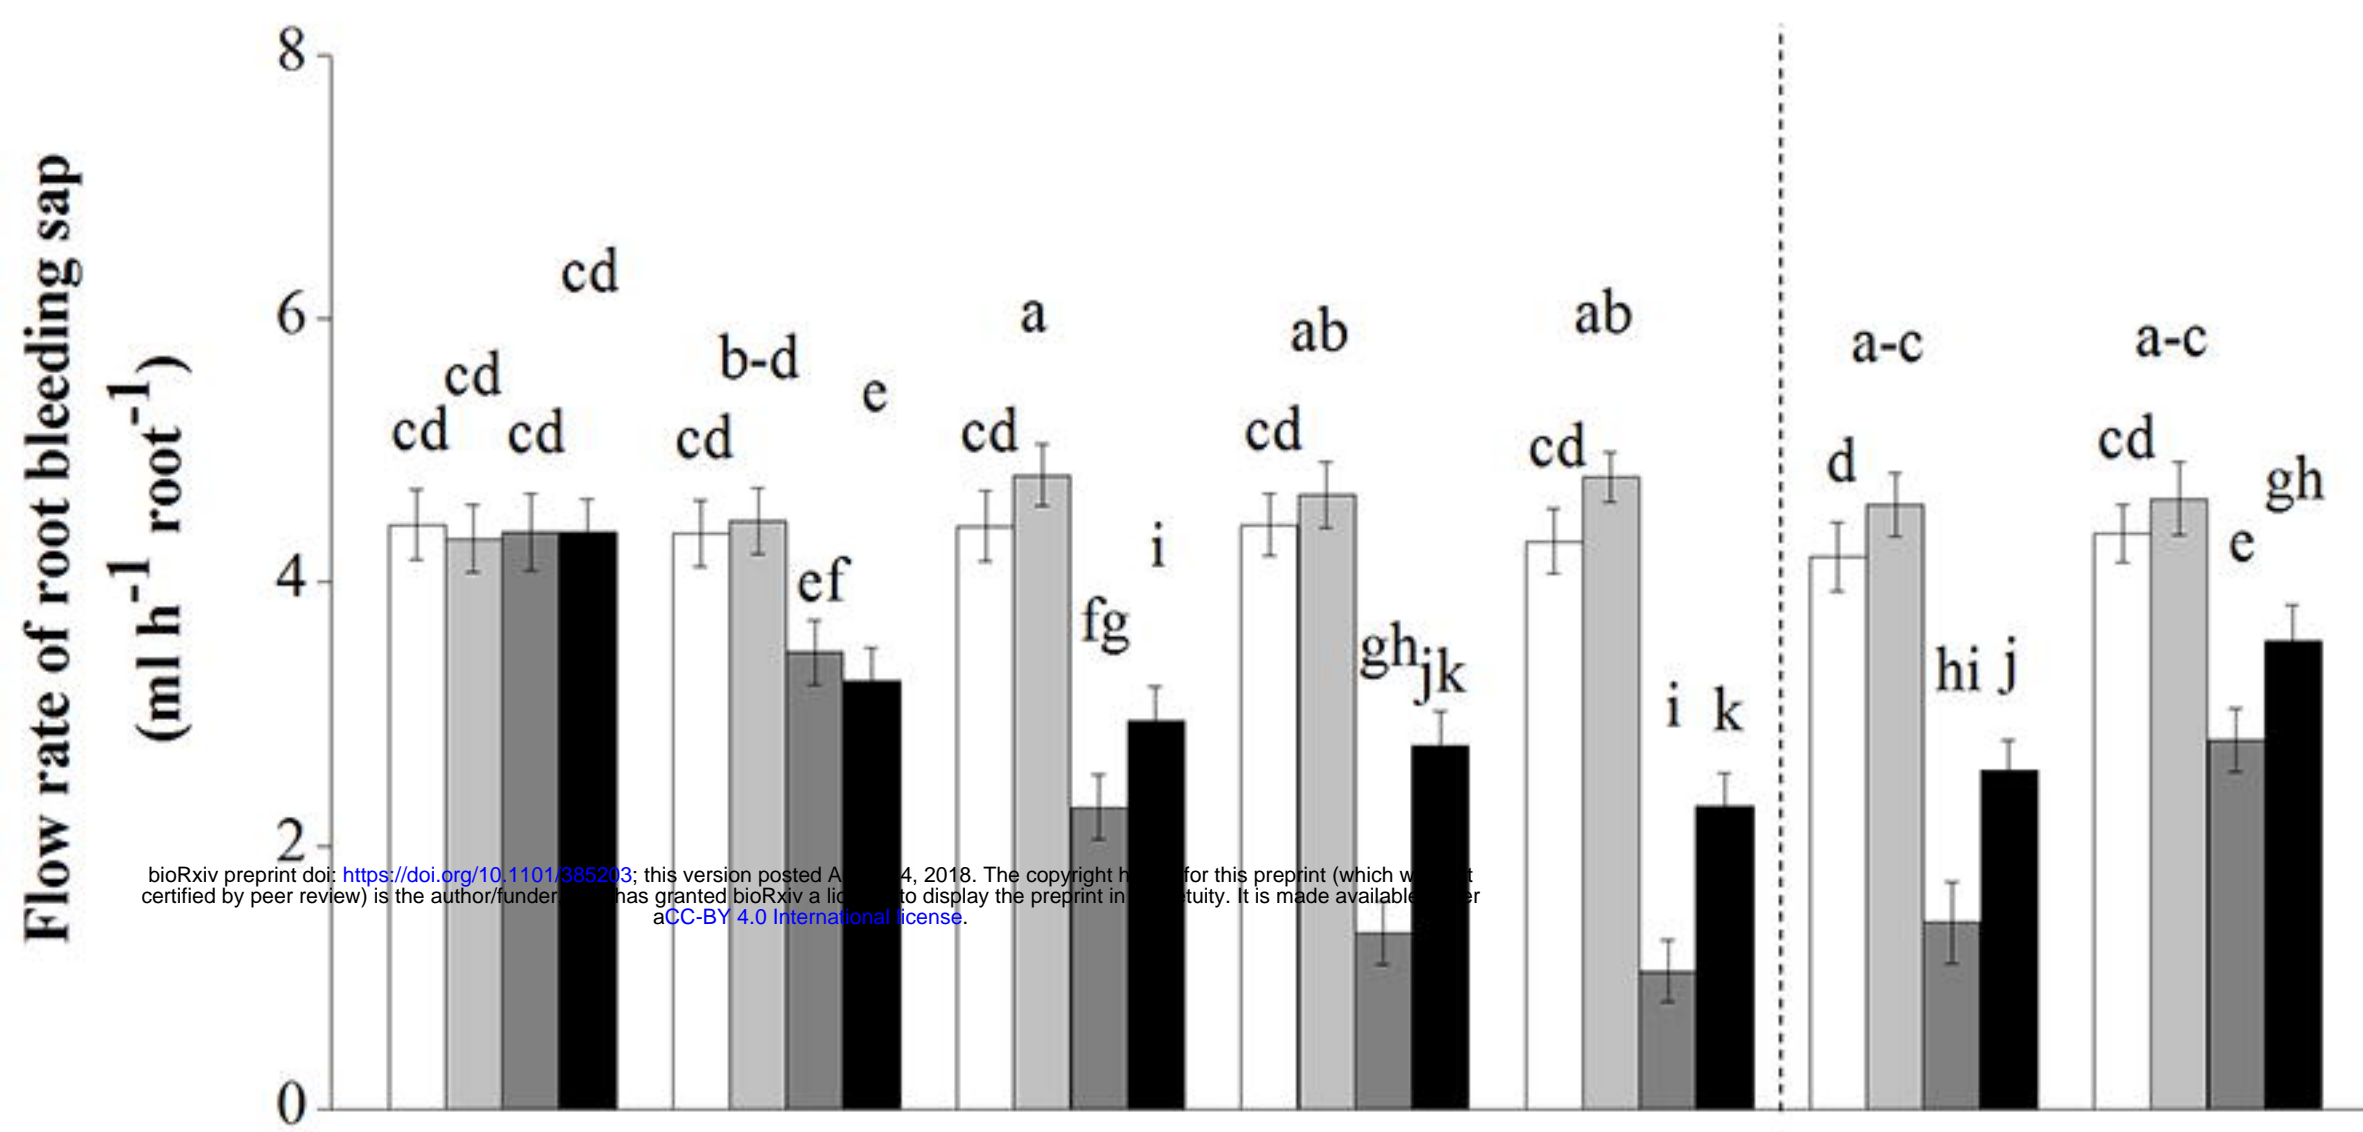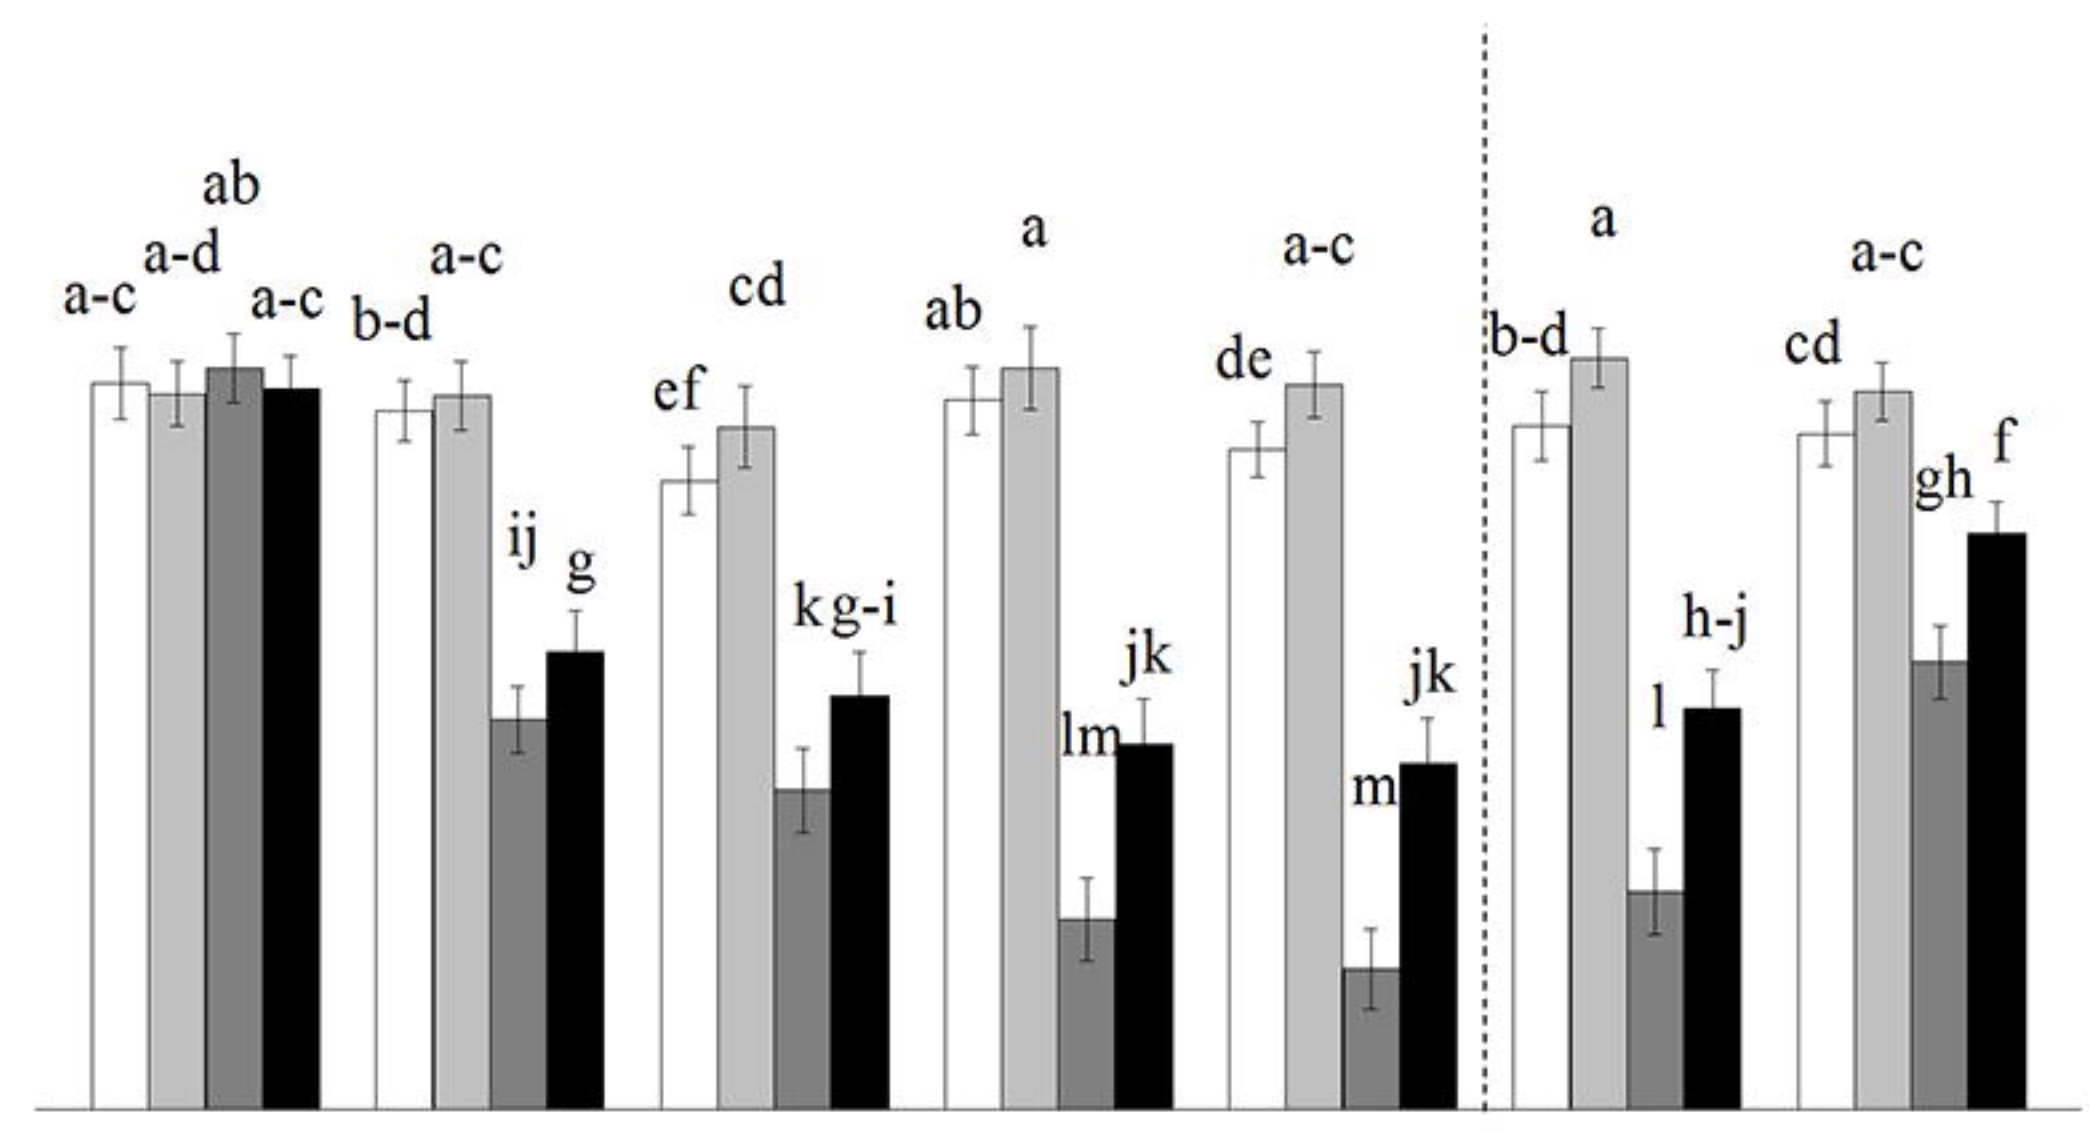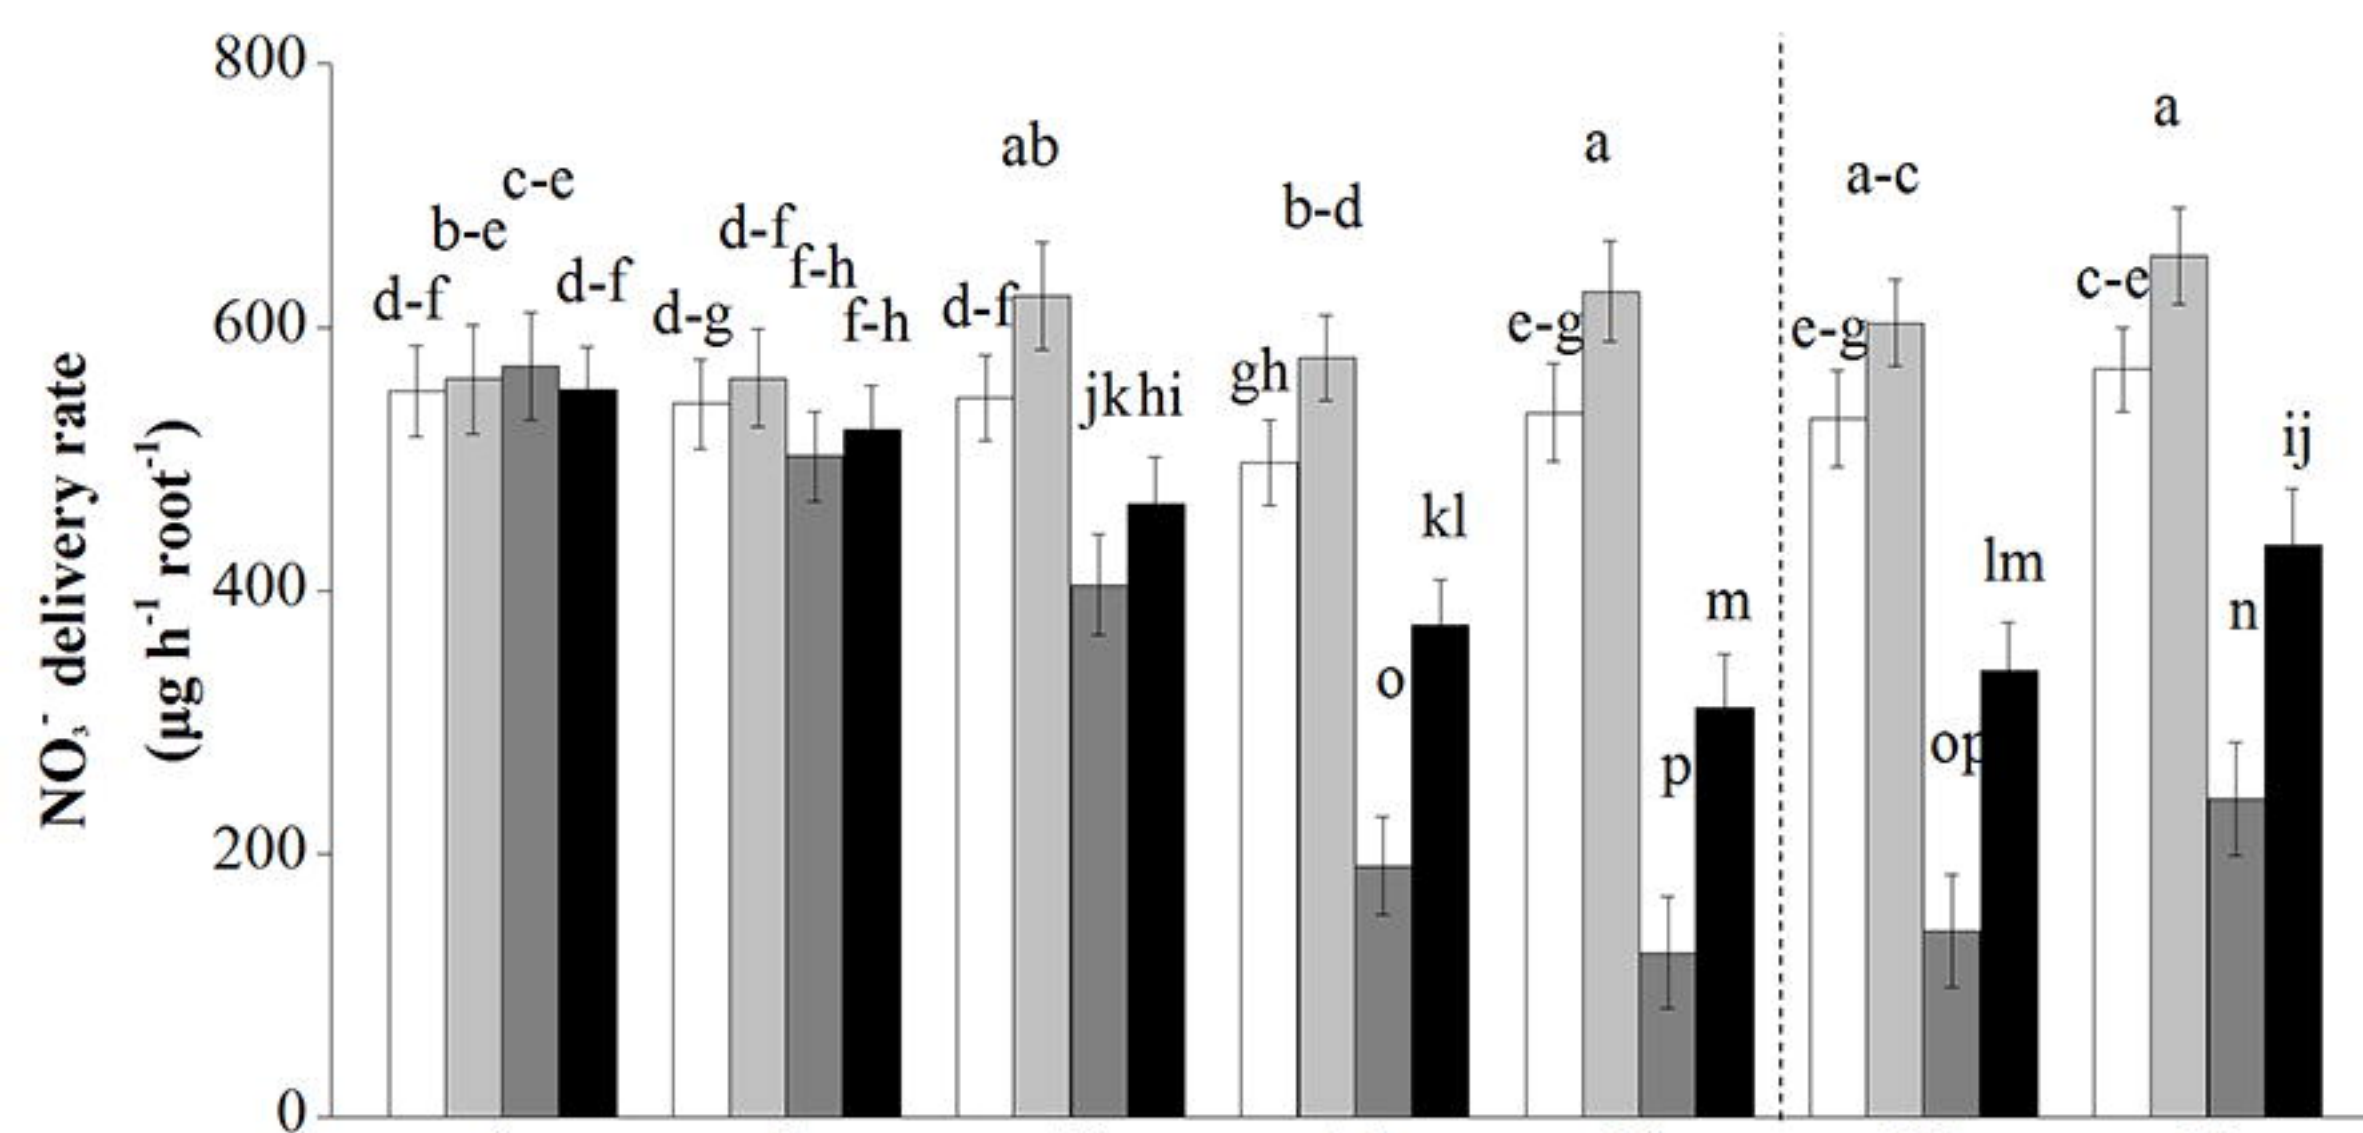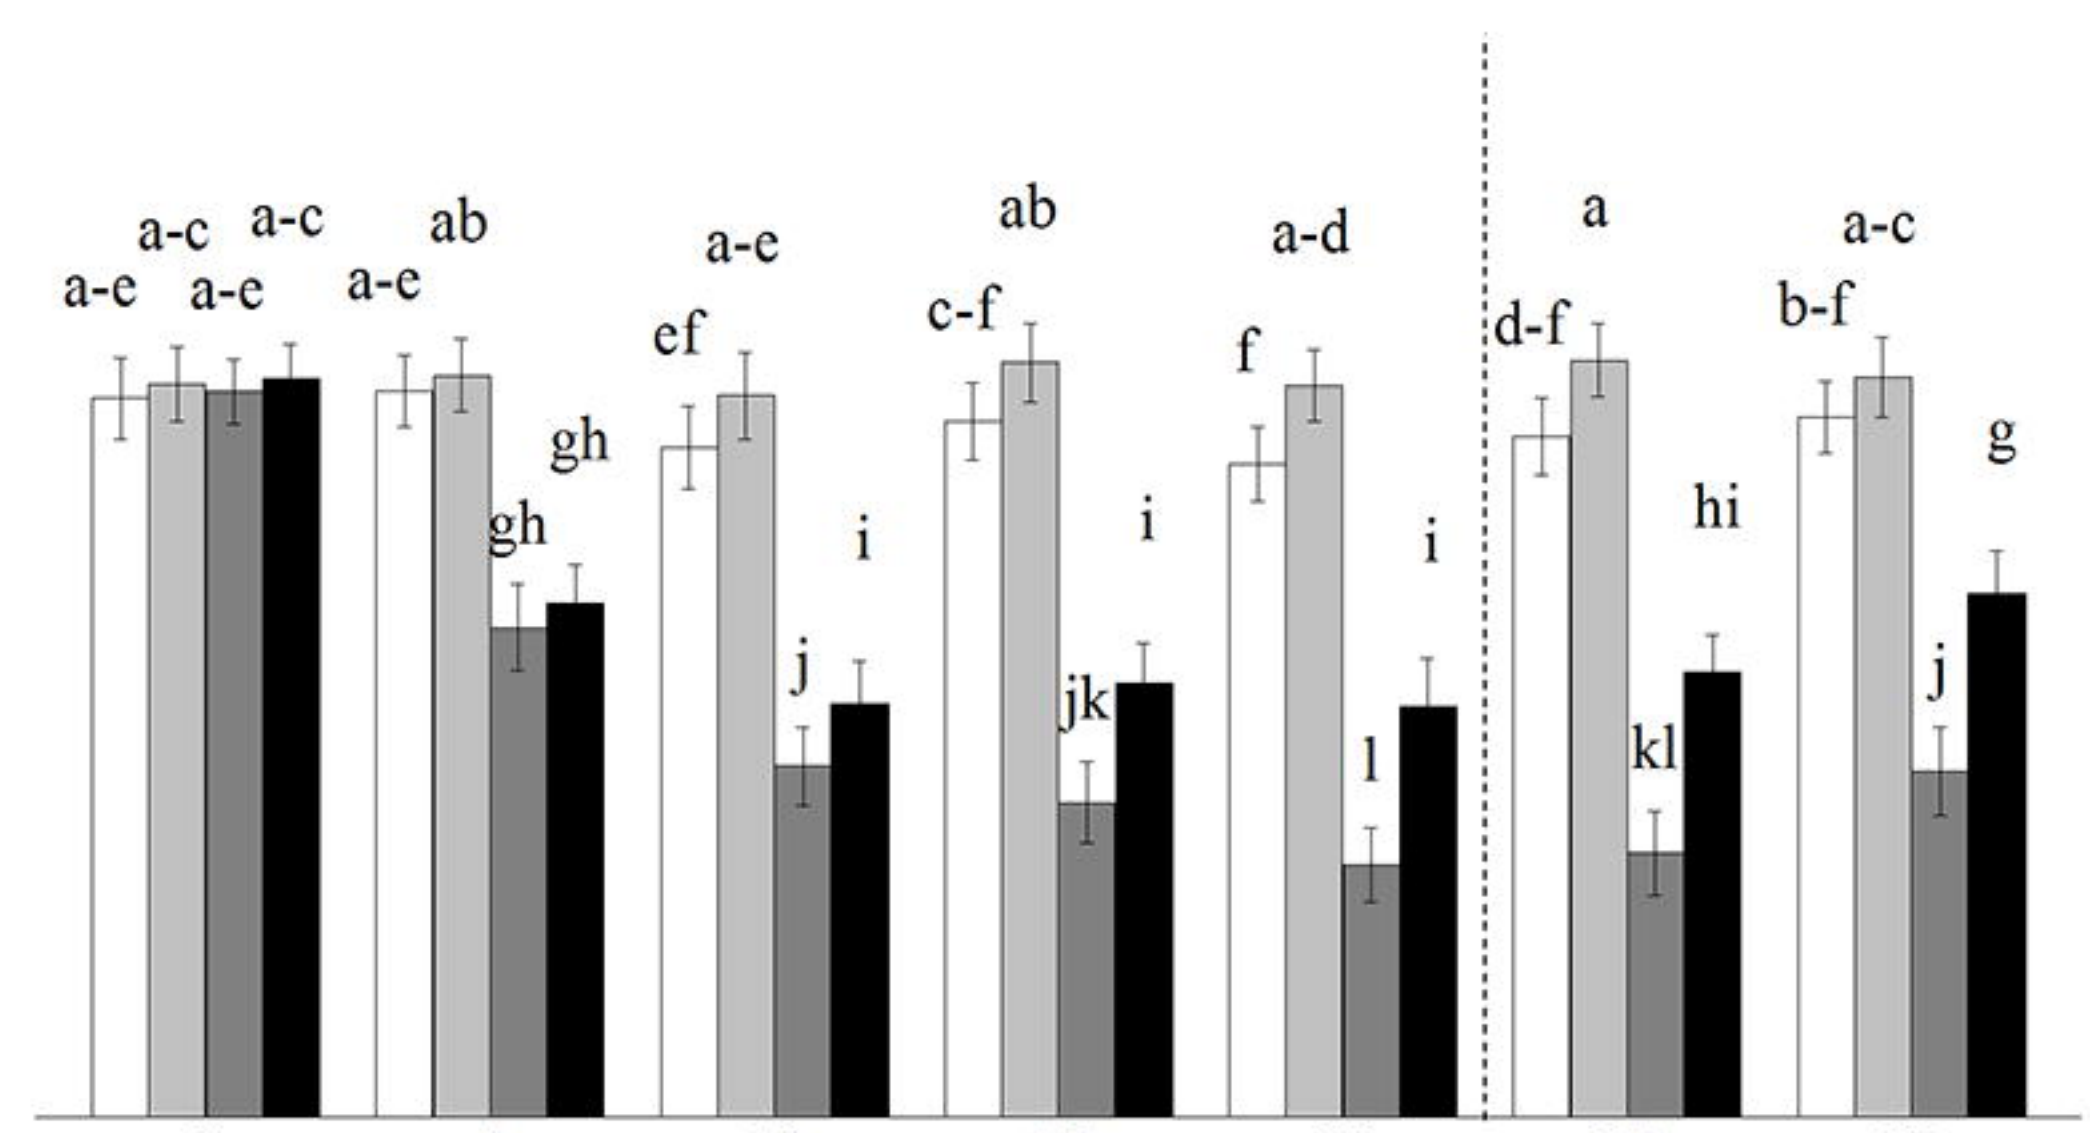

Drought

Rehydration

Days after treatment

Drought

Rehydration

Days after treatment

Well-watered Well-watered+DCPTA Drought Drought+DCPTA

2017

2016

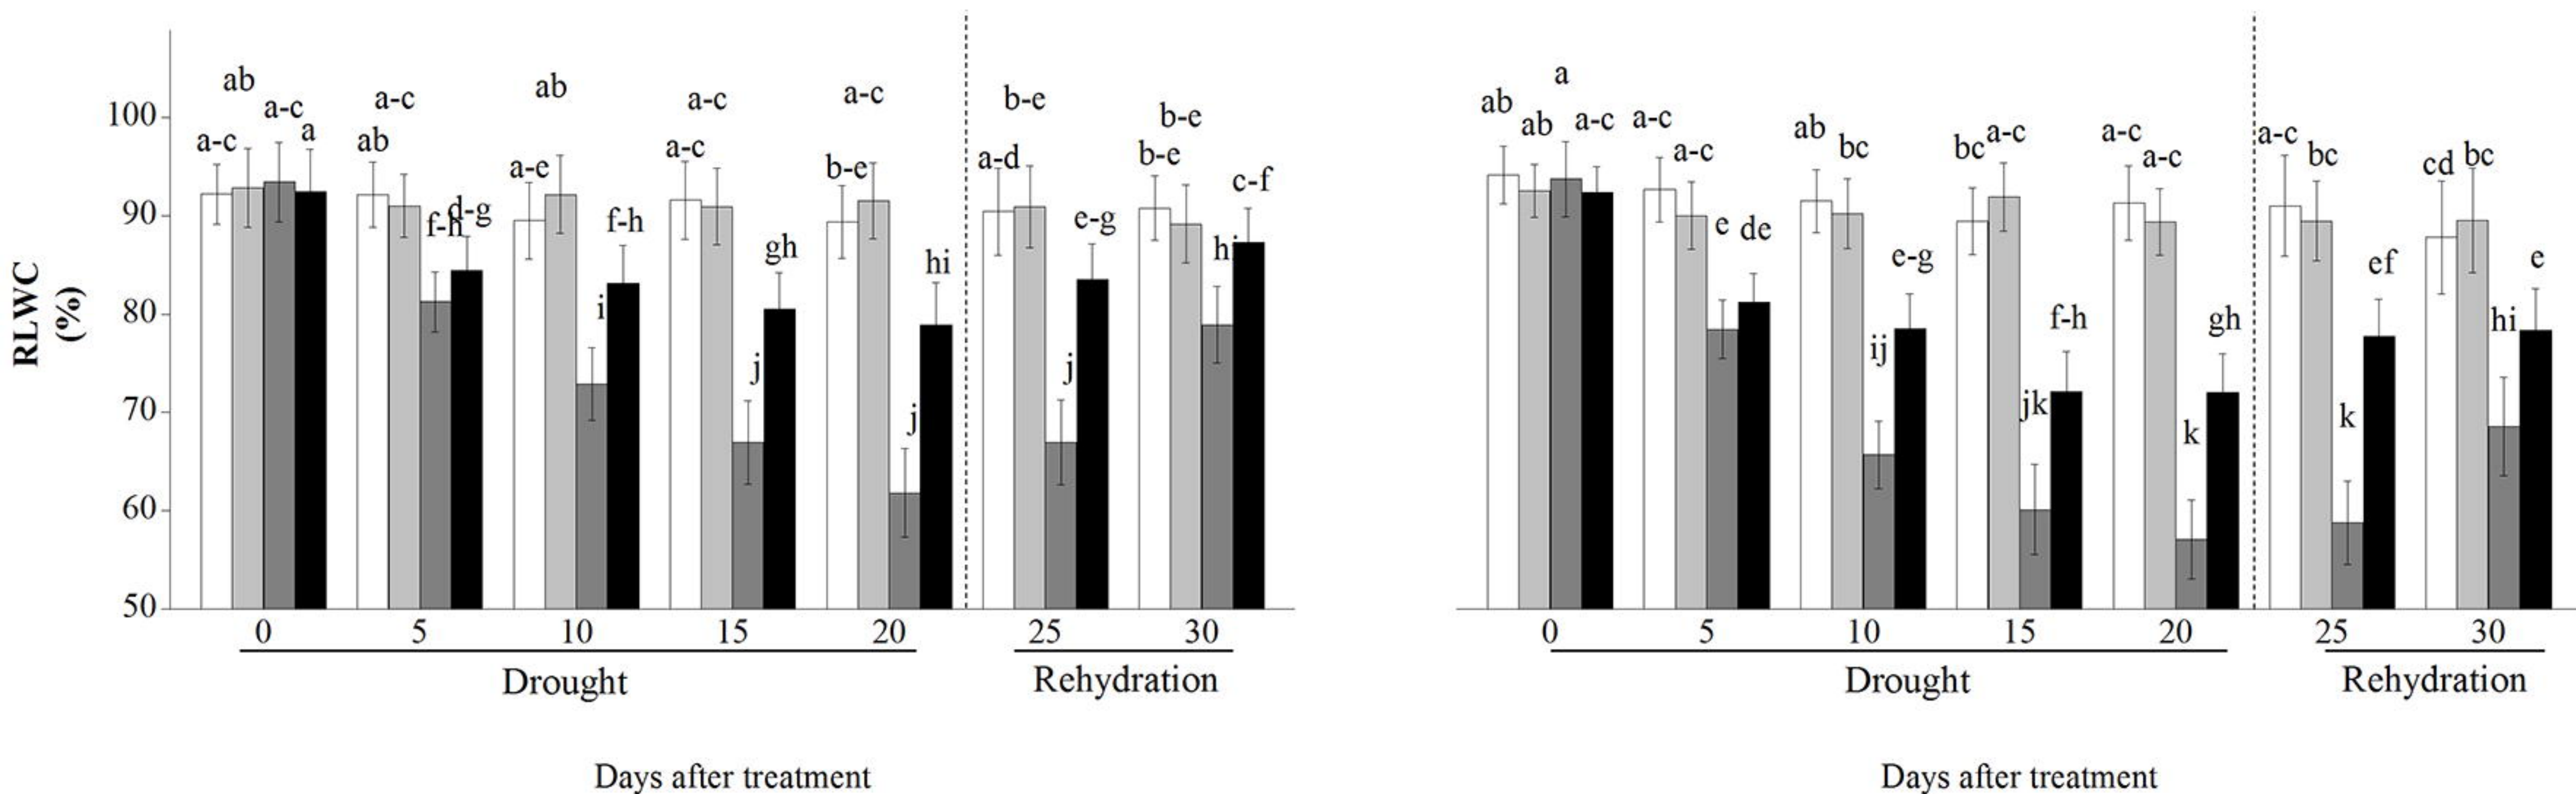

Well-watered

Well-watered+DCPTA

Drought

Drought+DCPTA

2016

2017

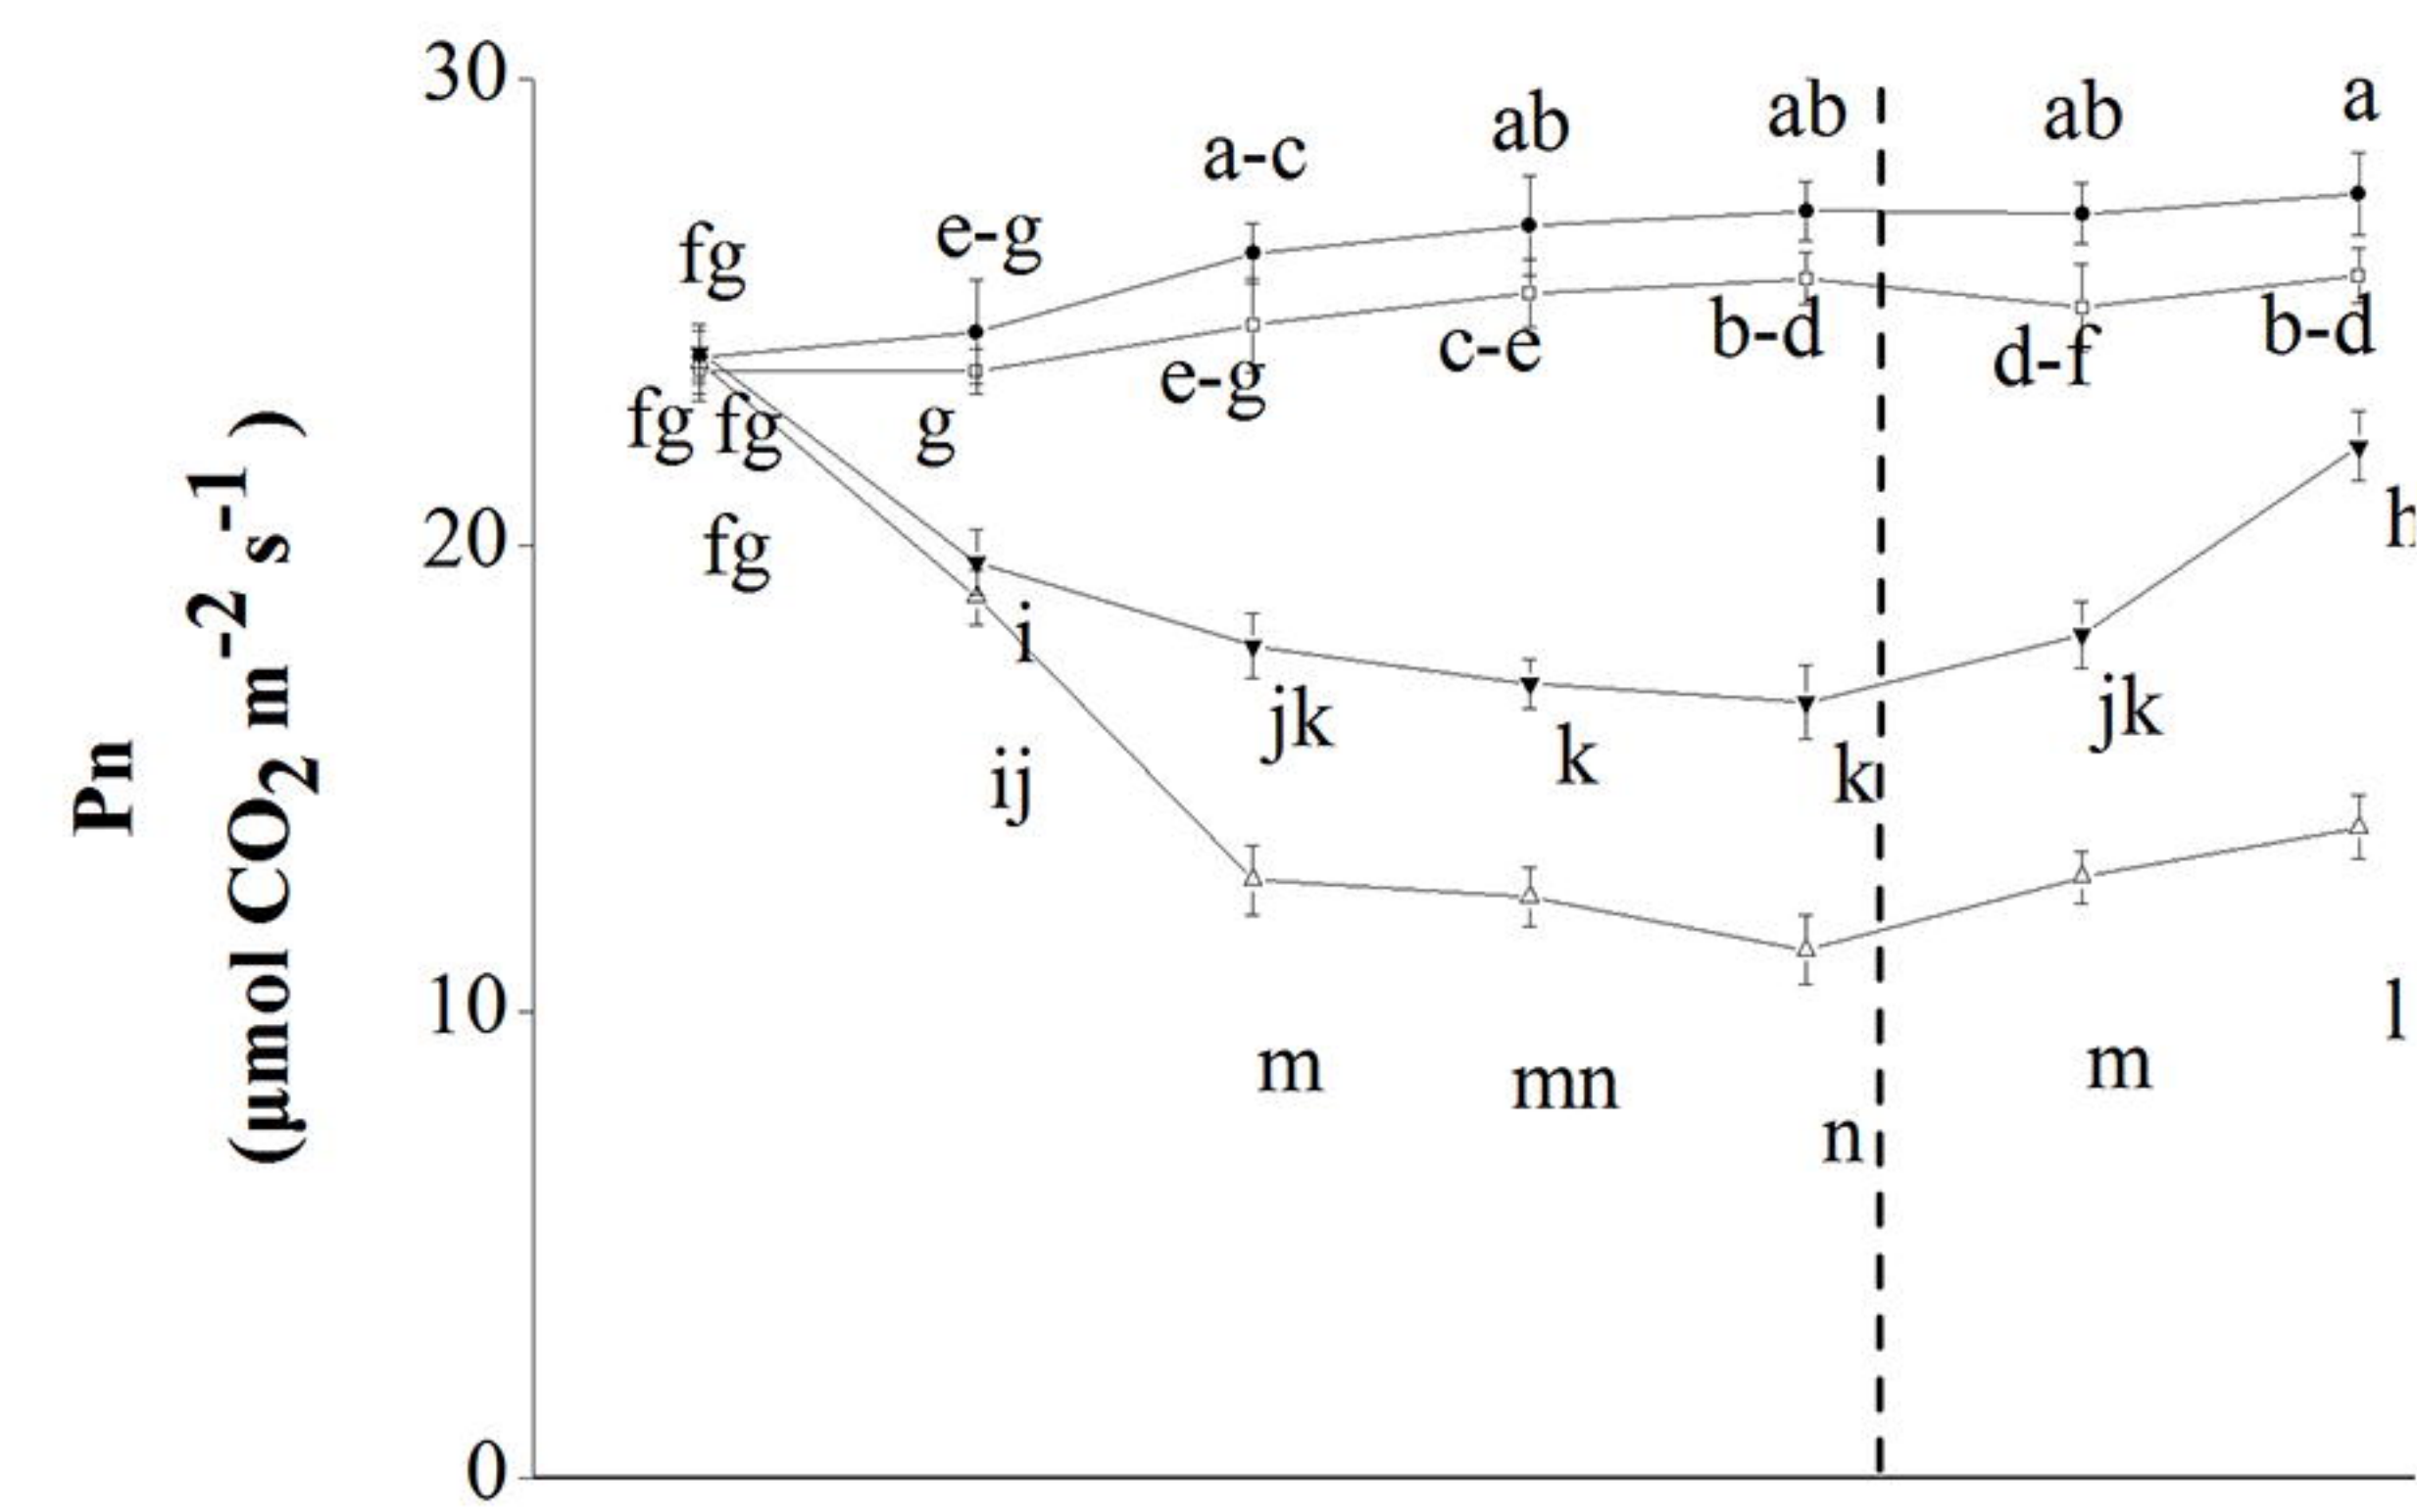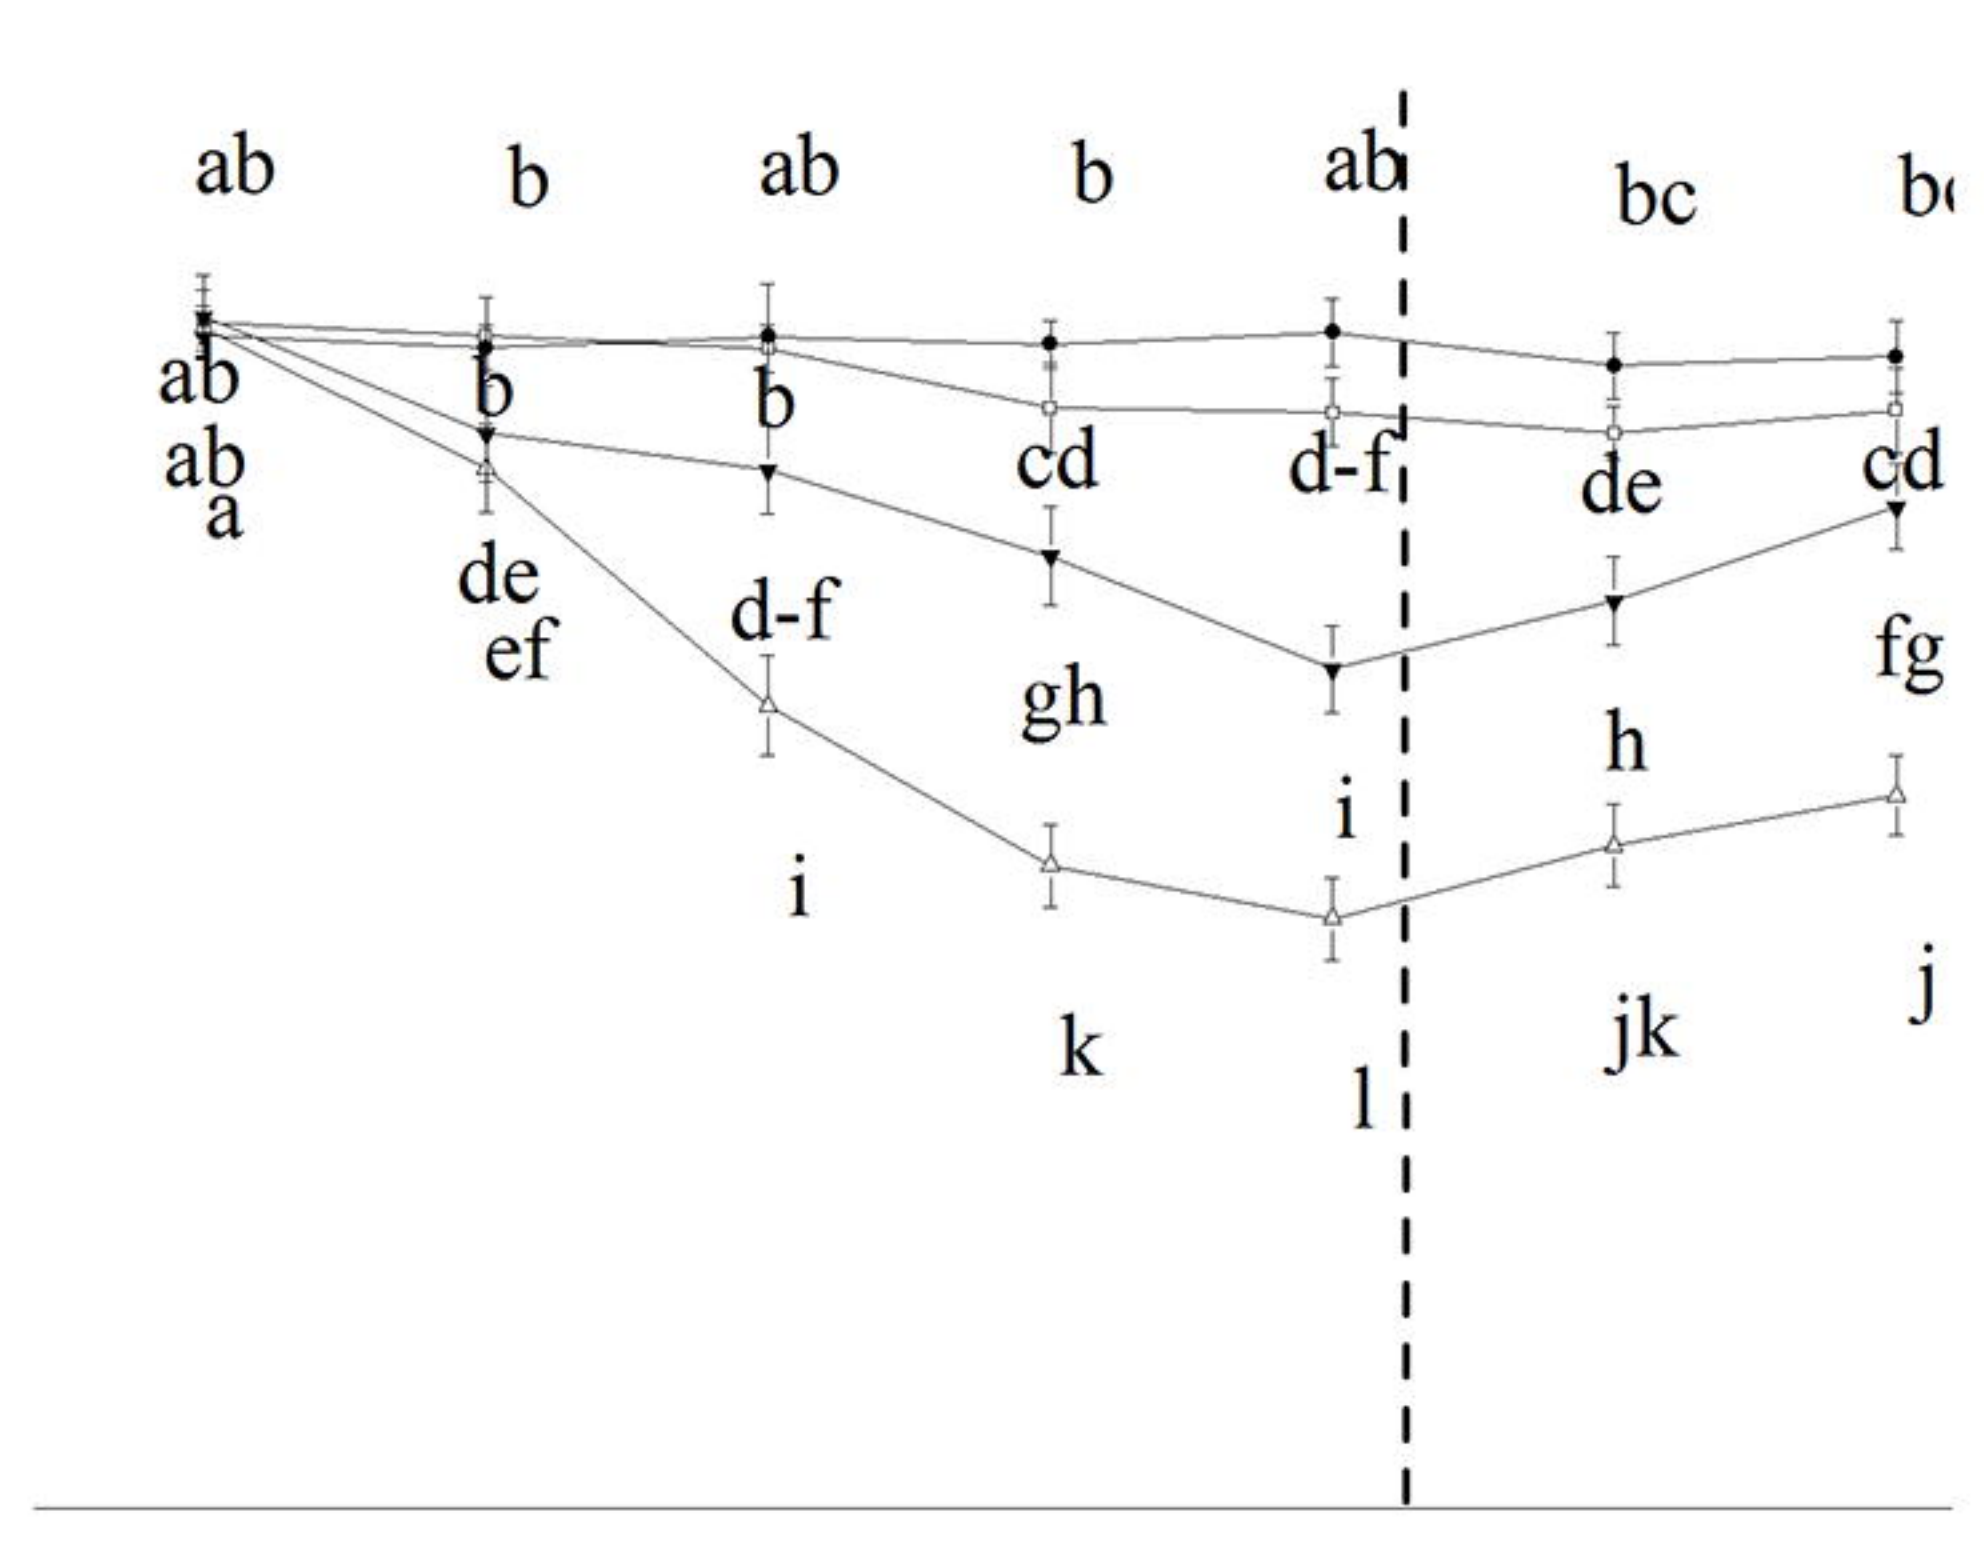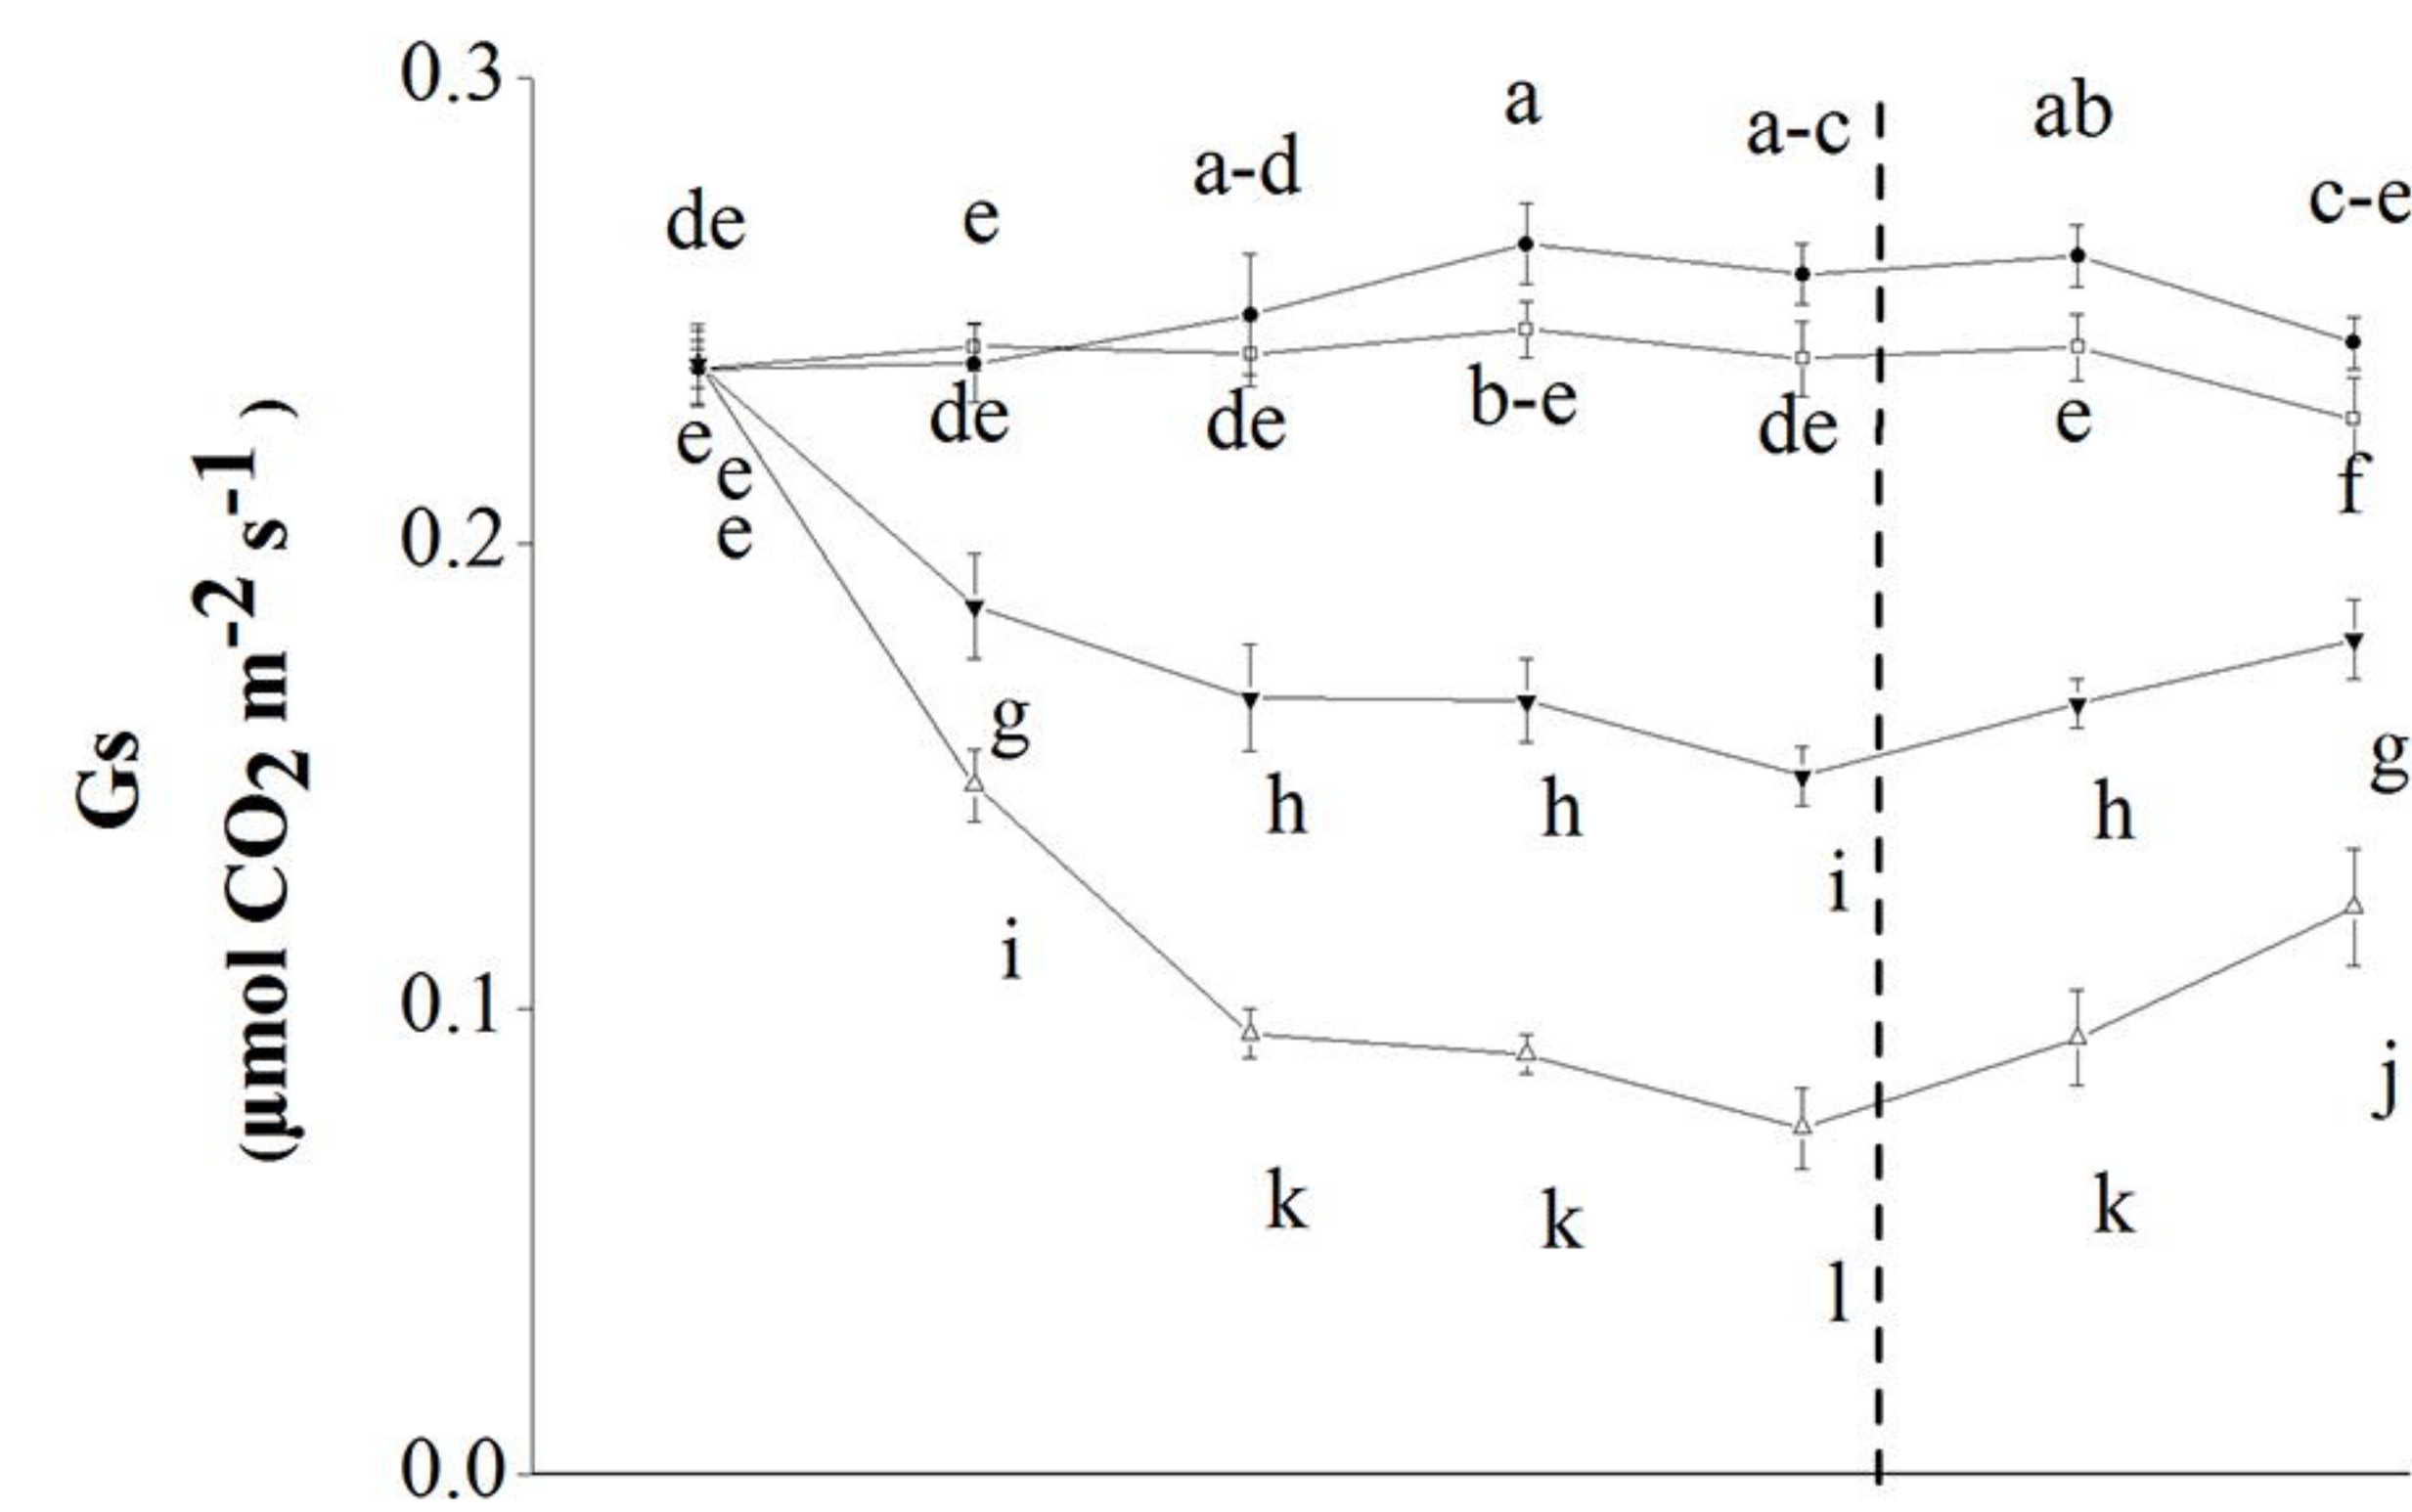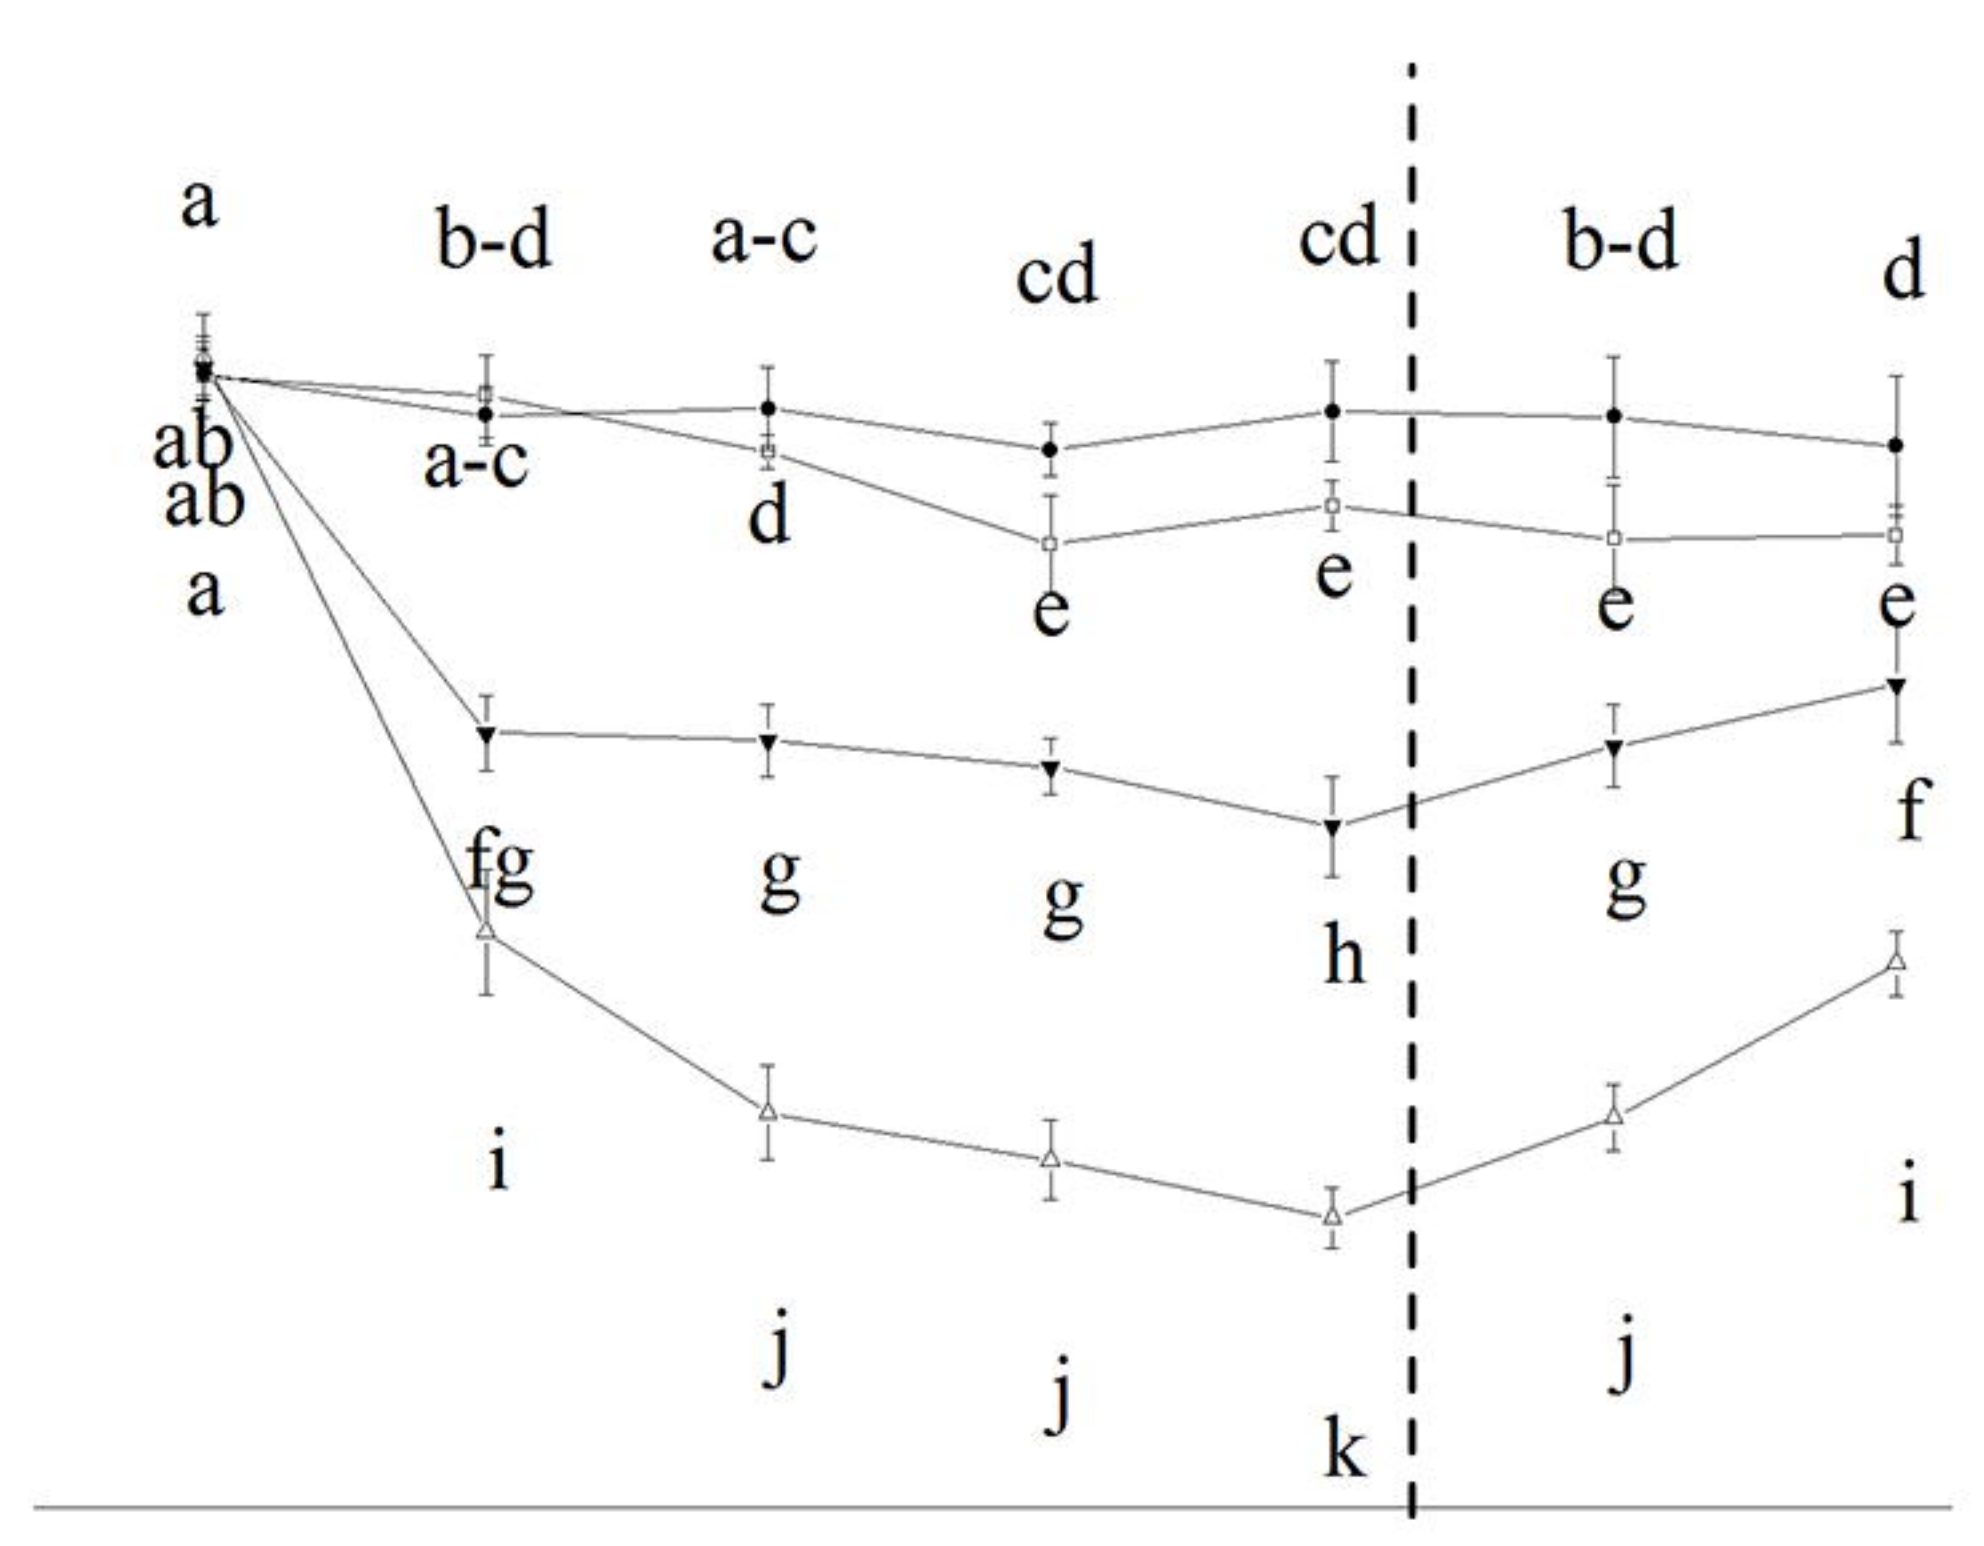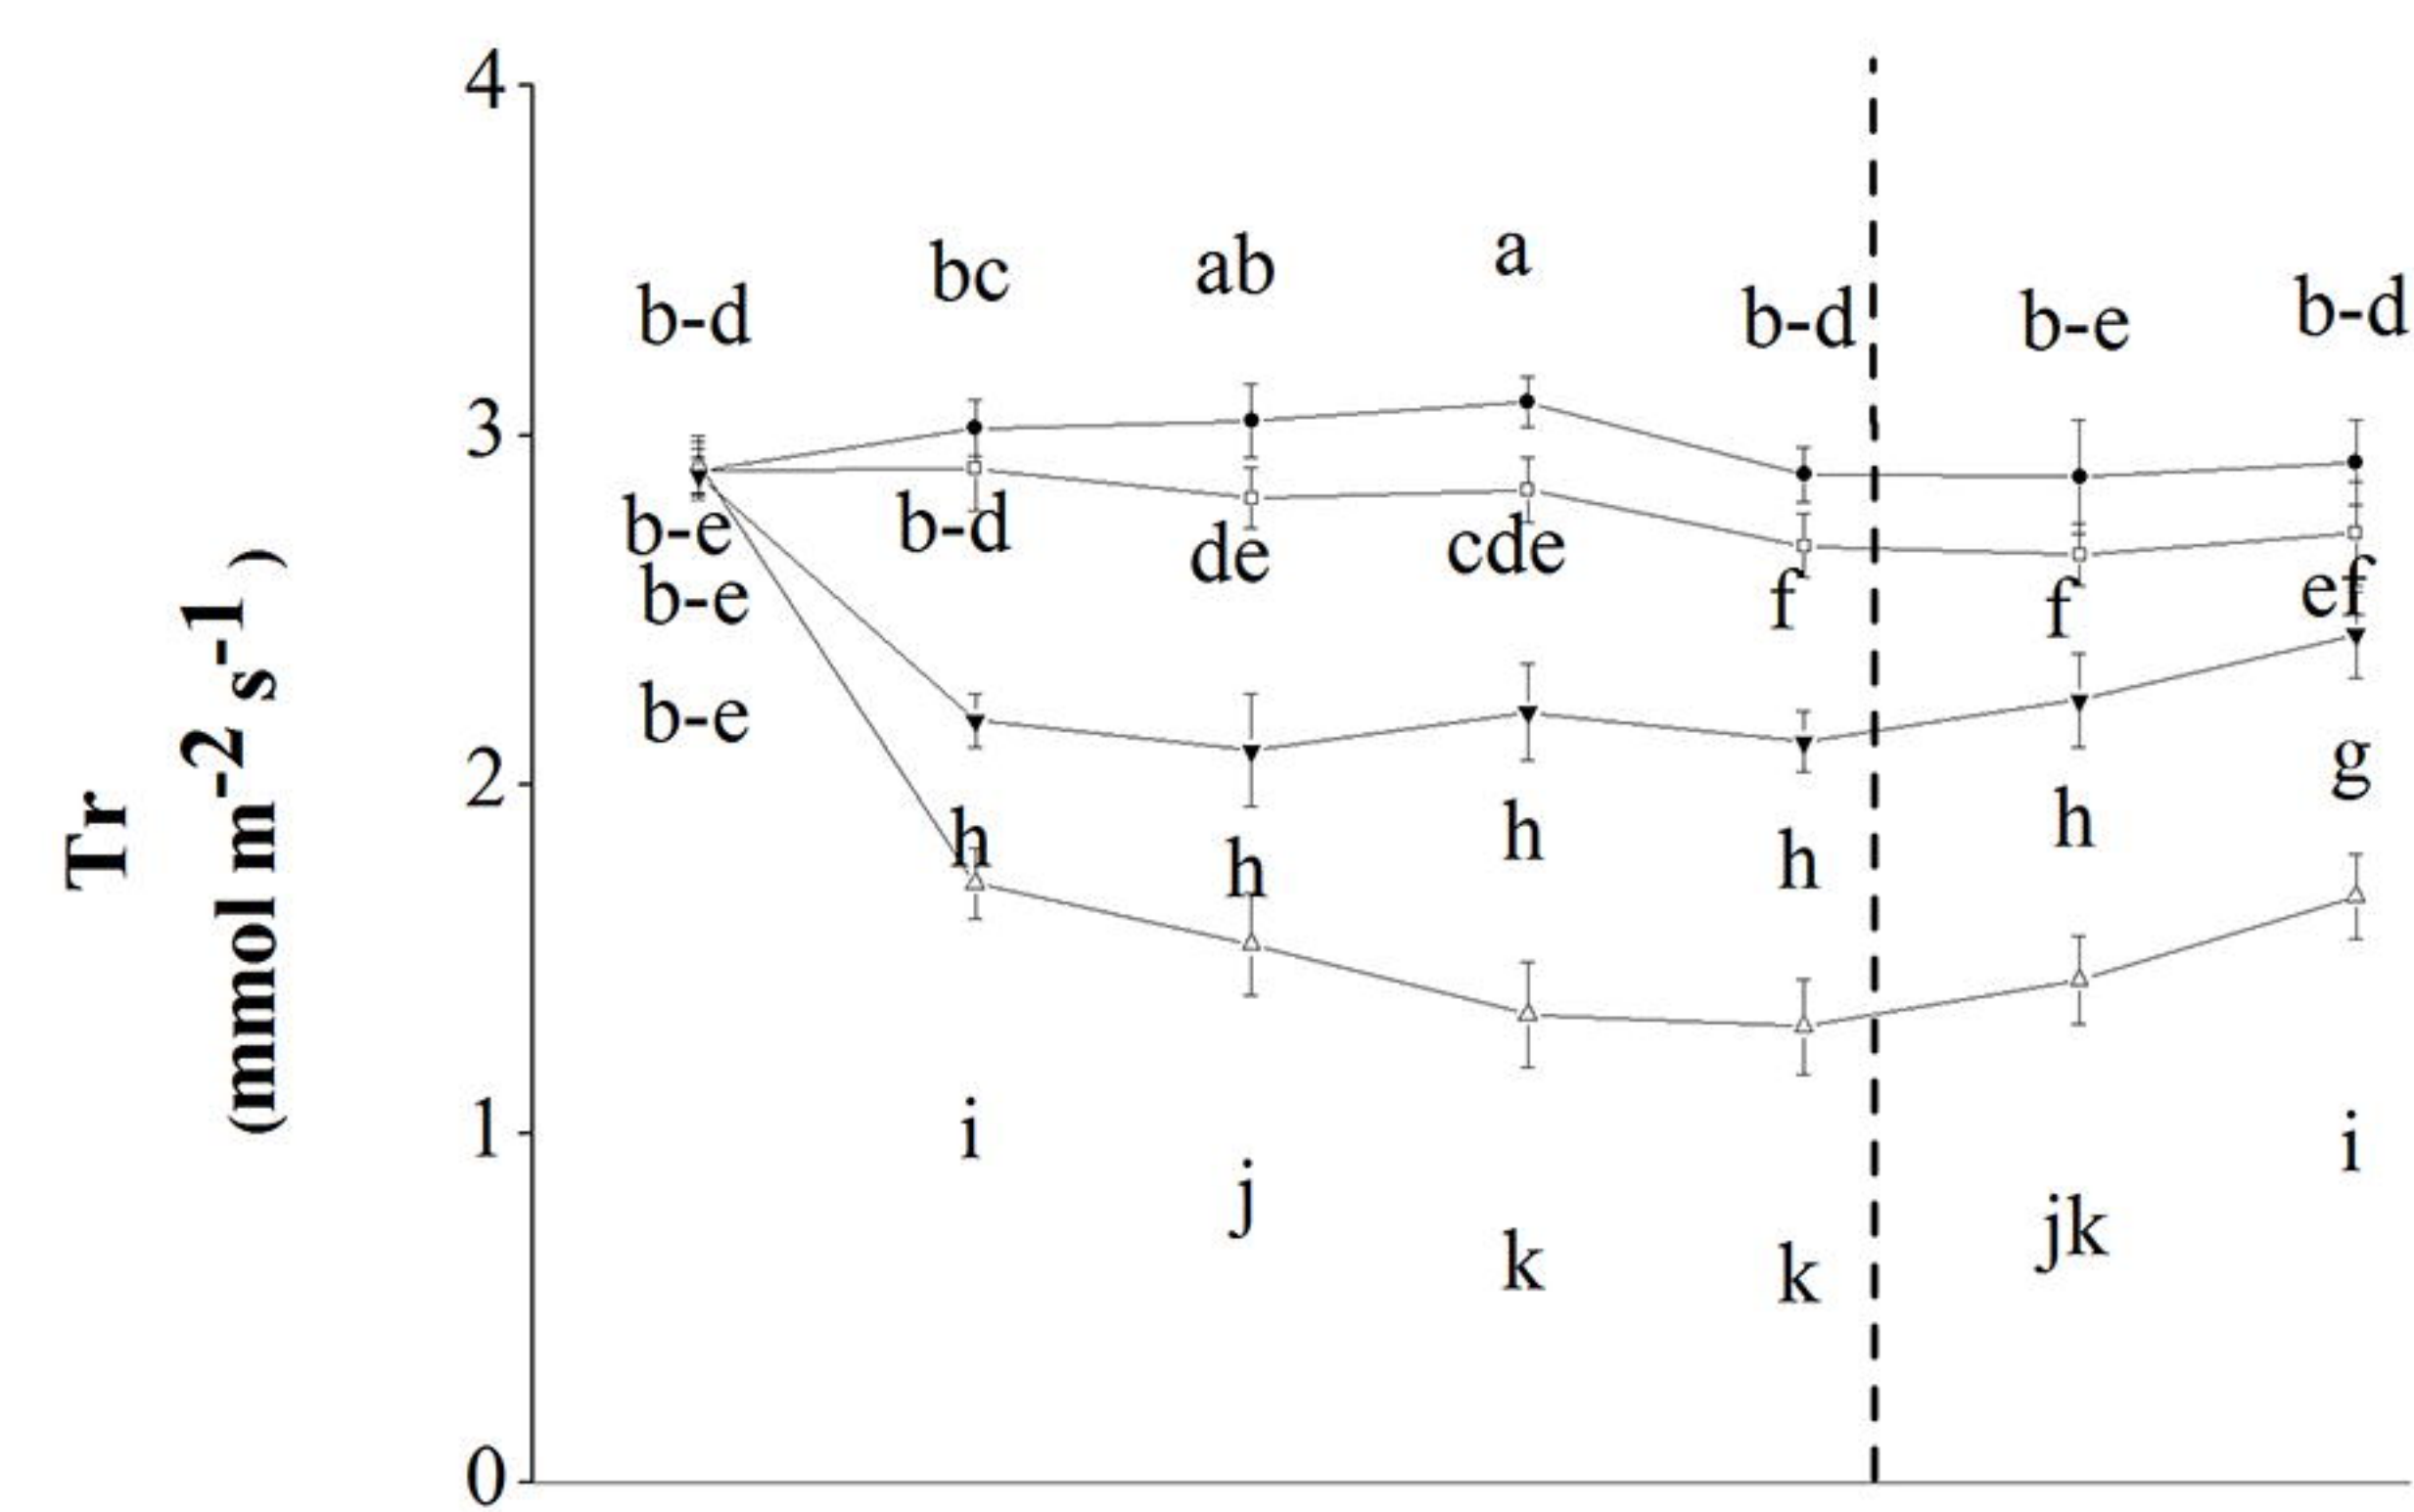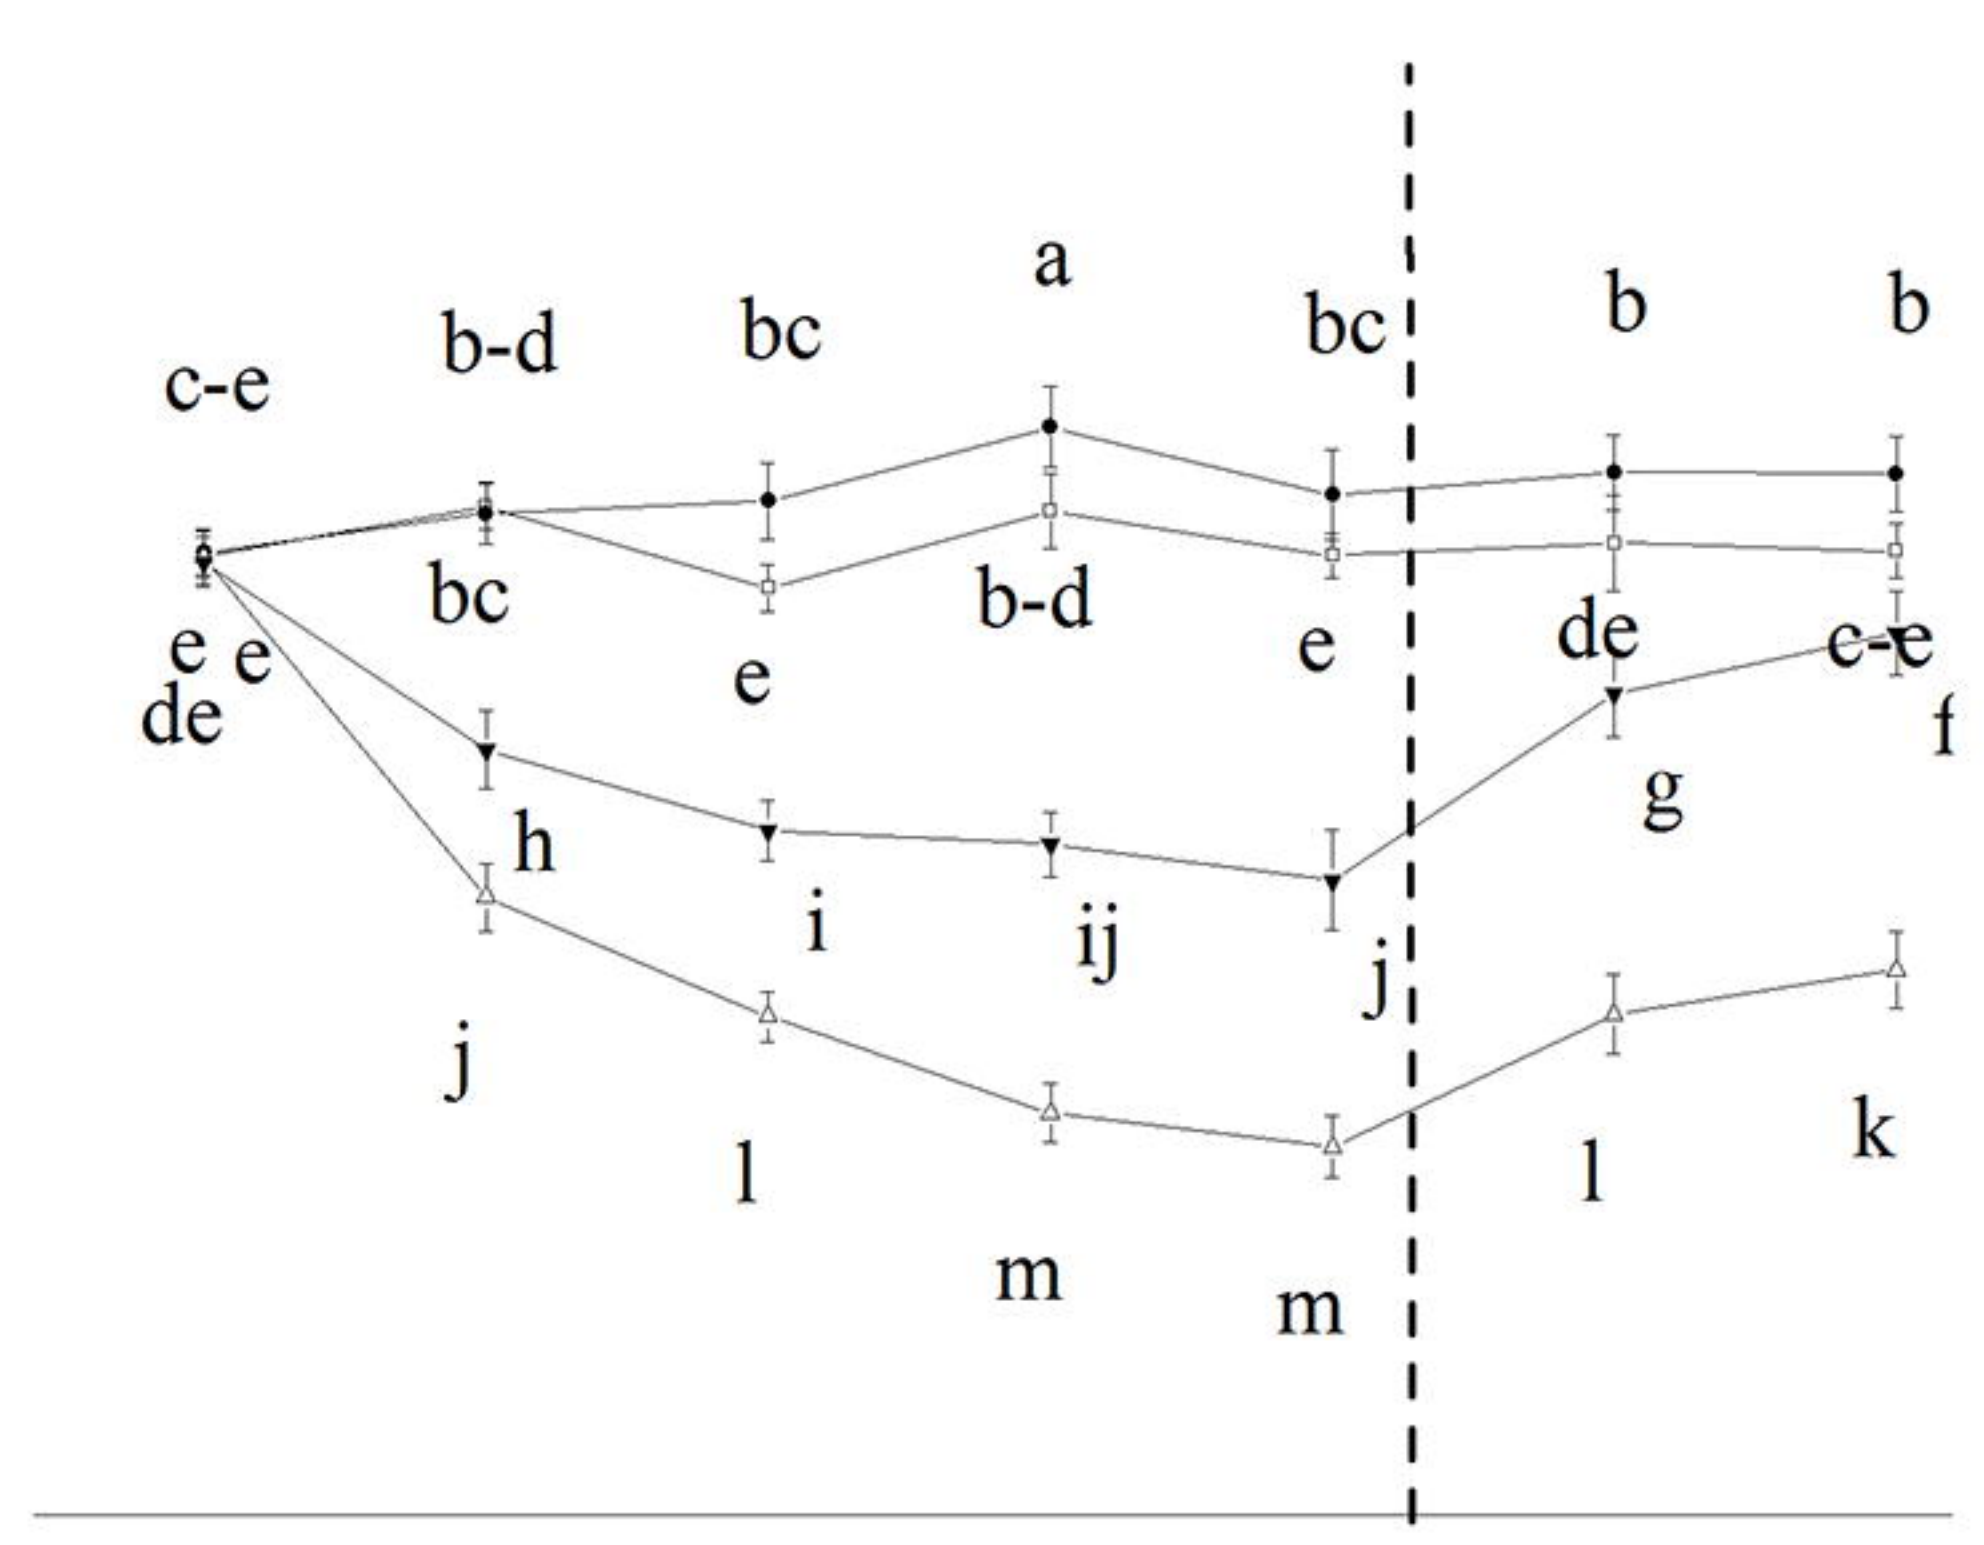

bioRxiv preprint doi: <https://doi.org/10.1101/386203>; this version posted August 4, 2018. The copyright holder for this preprint (which was not certified by peer review) is the author/funder, who has granted bioRxiv a license to display the preprint in perpetuity. It is made available under aCC-BY 4.0 International license.

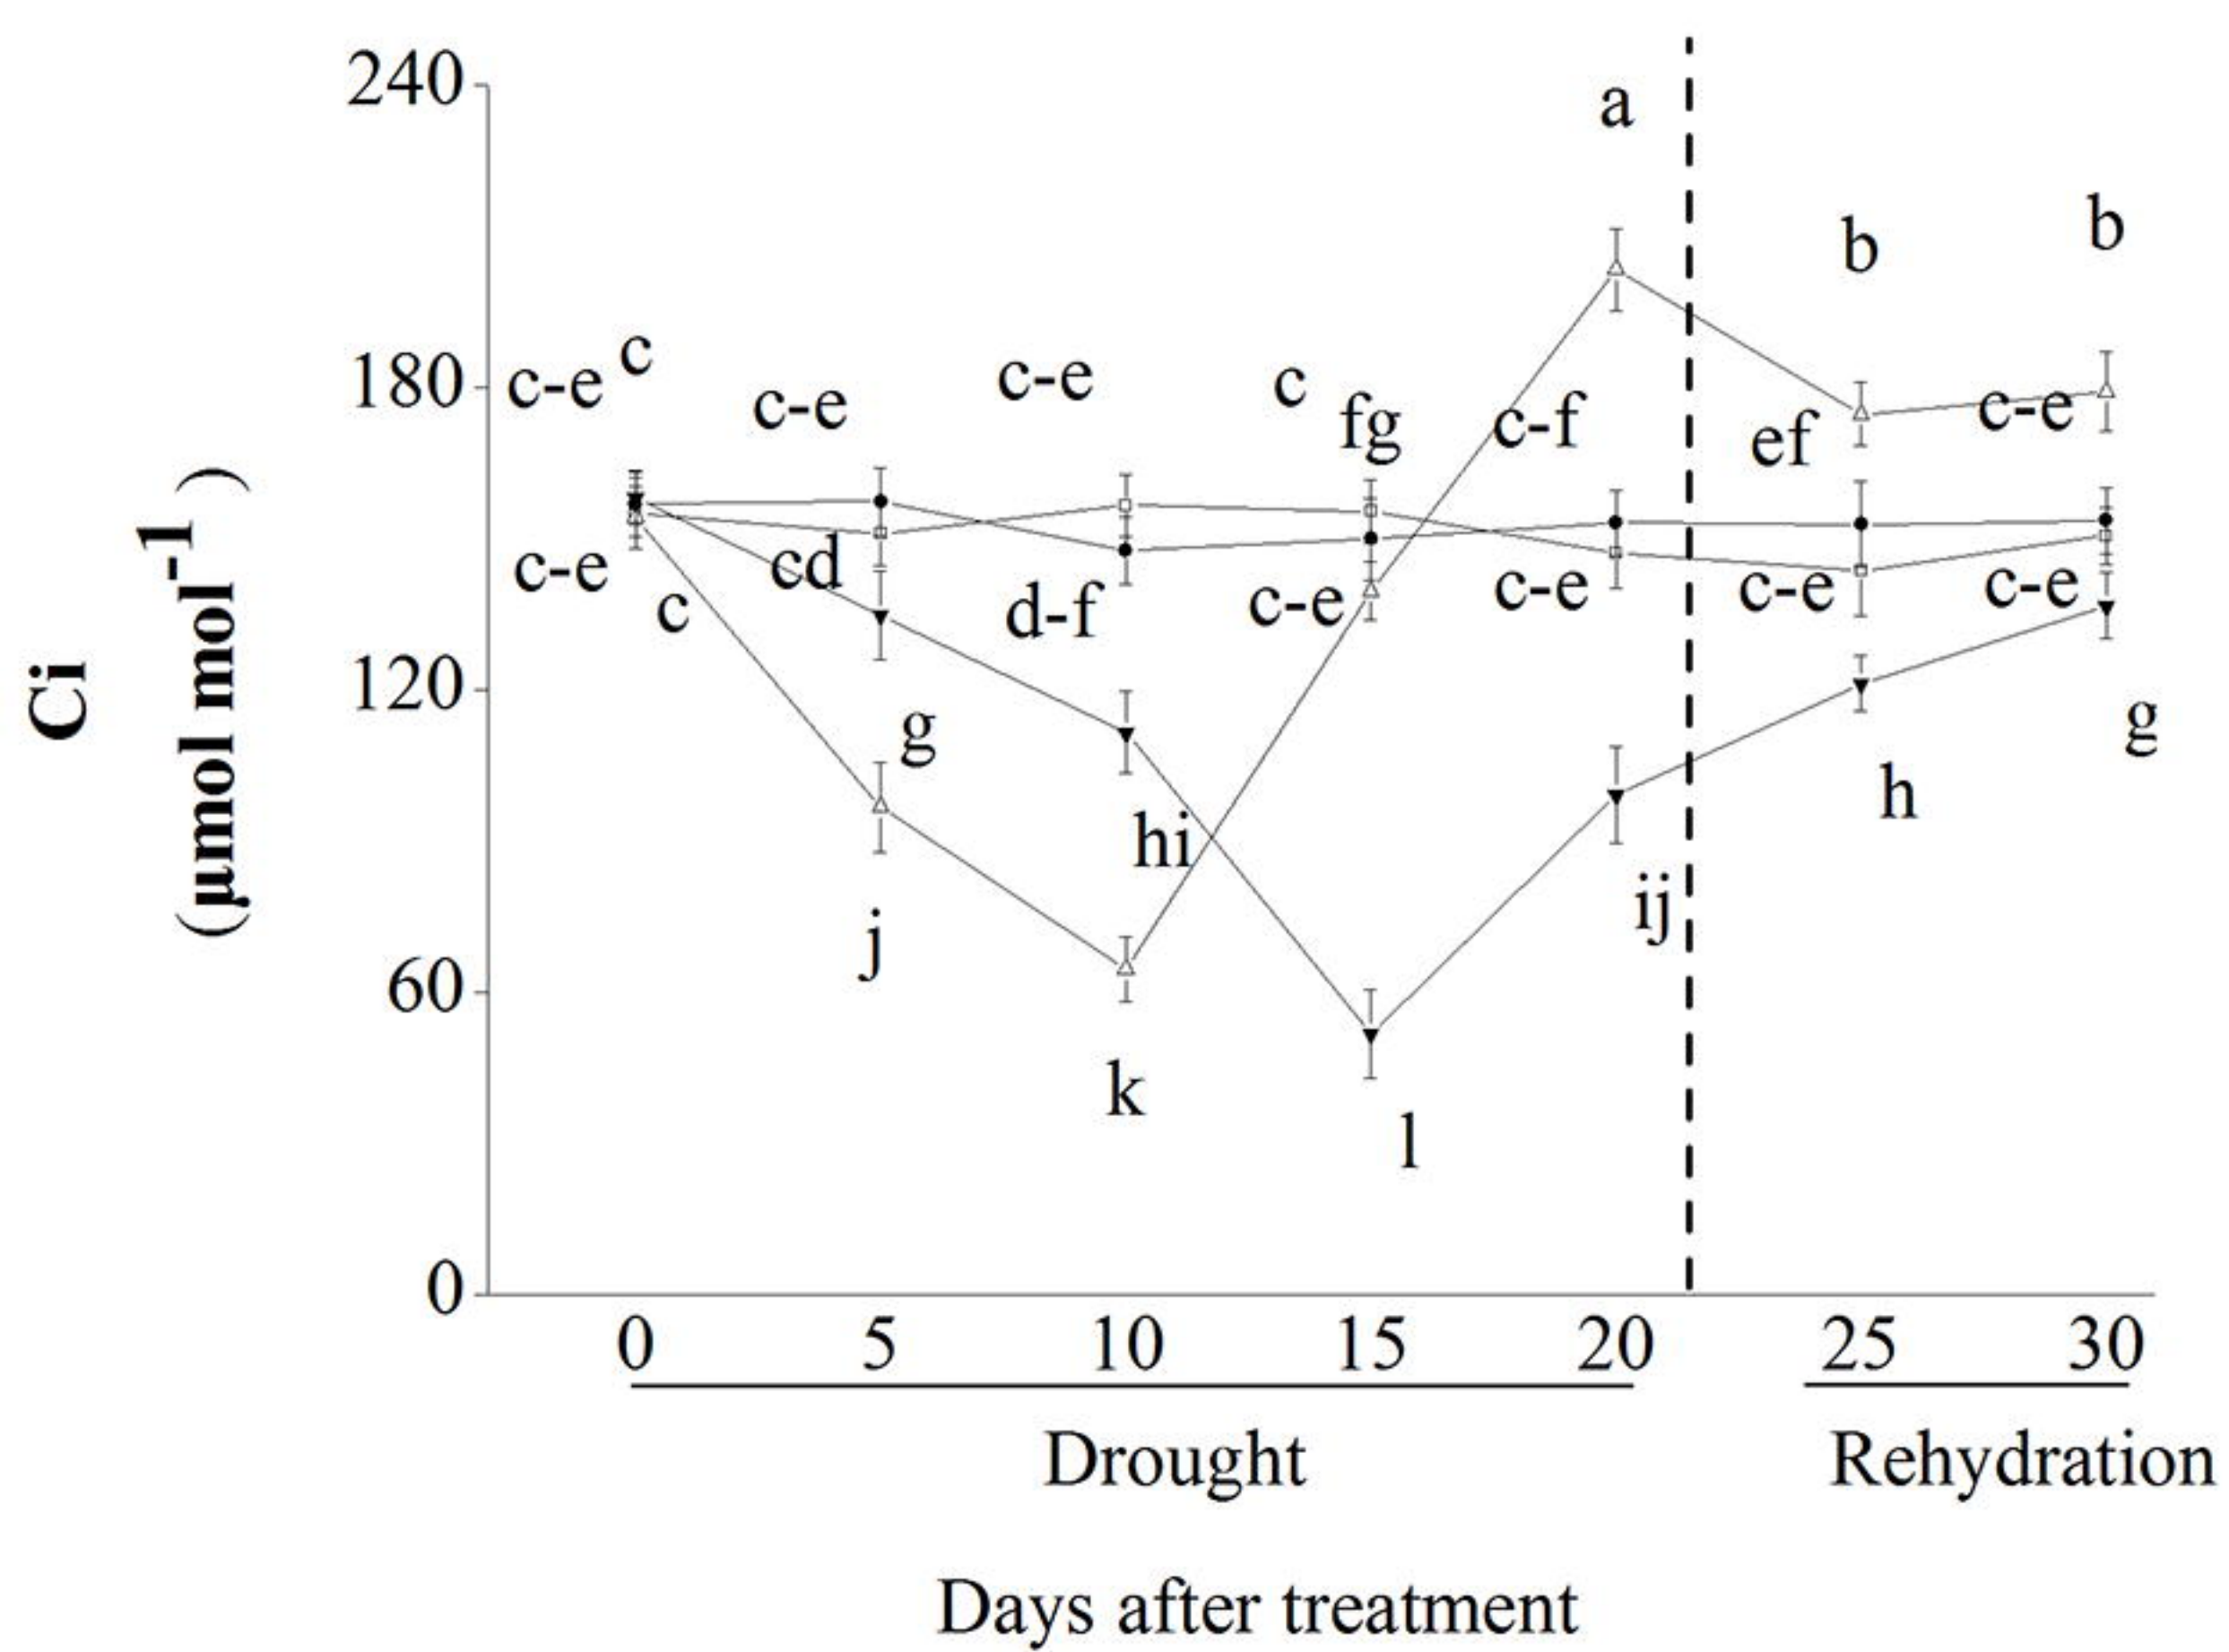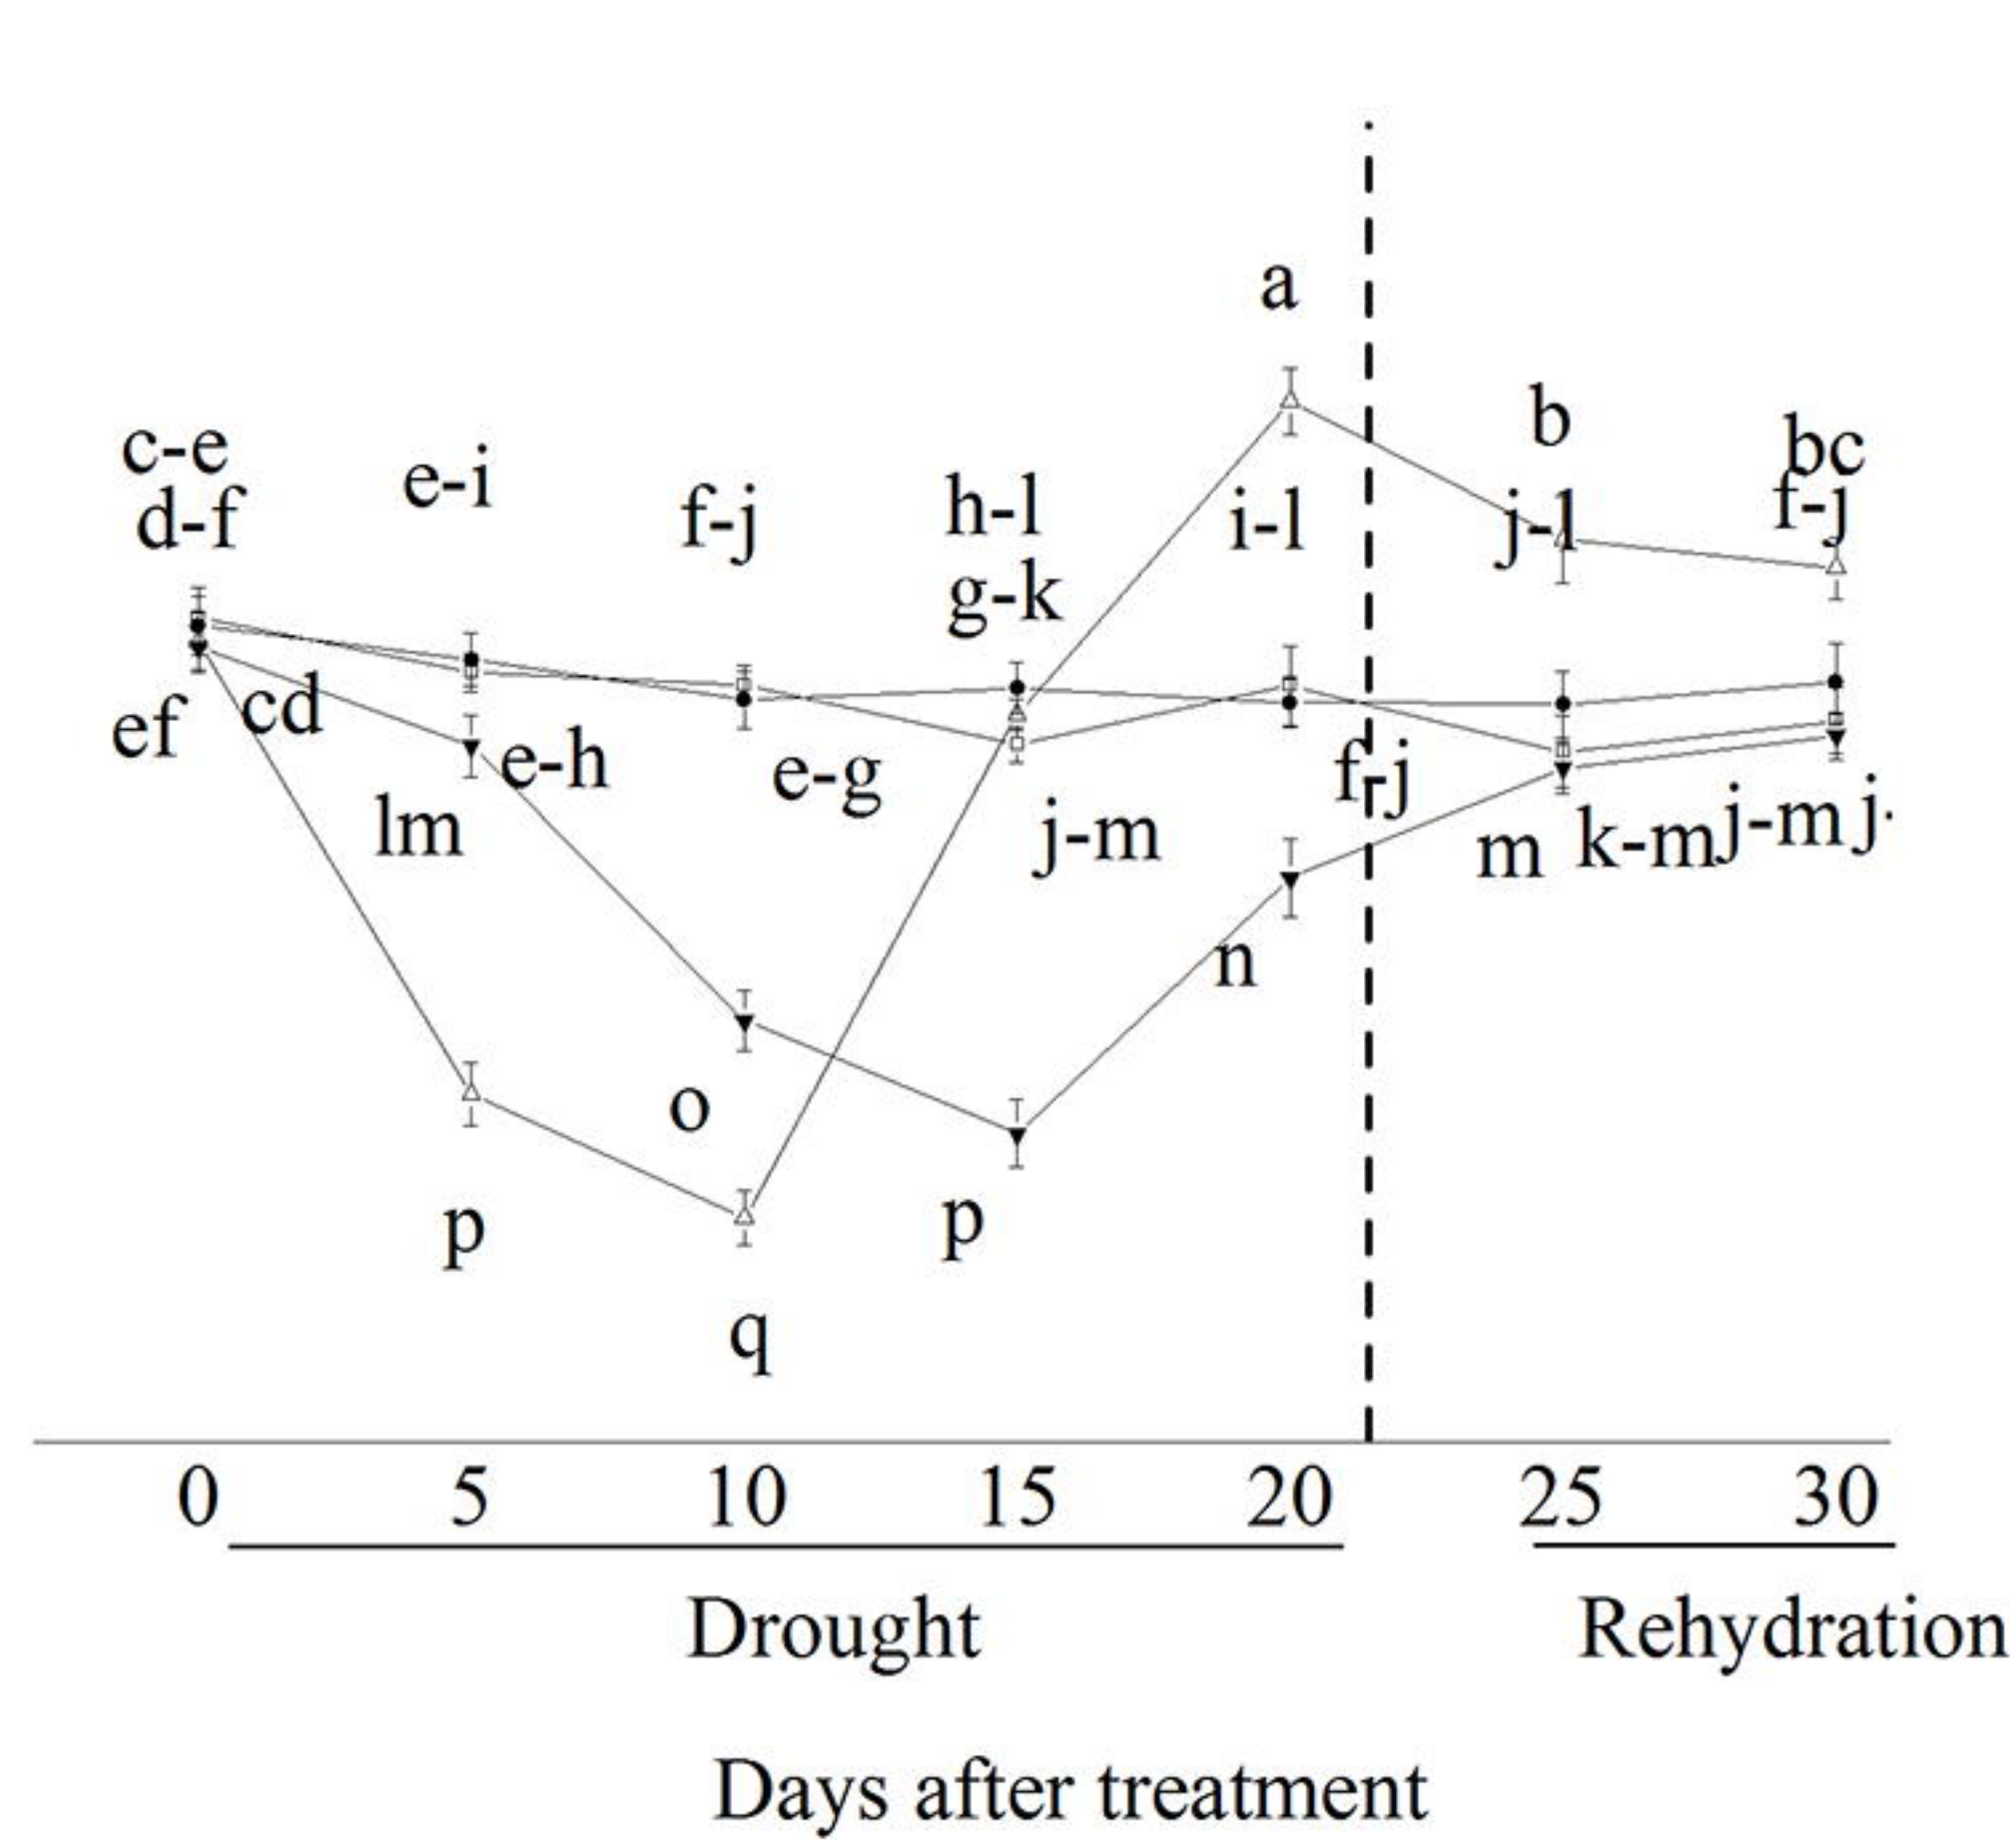

2016

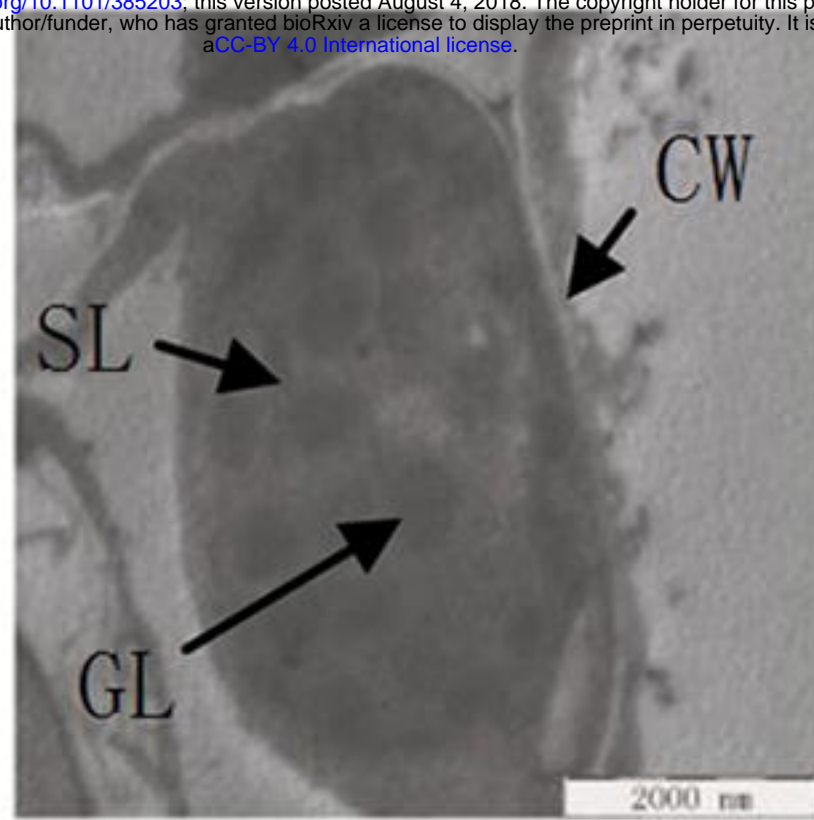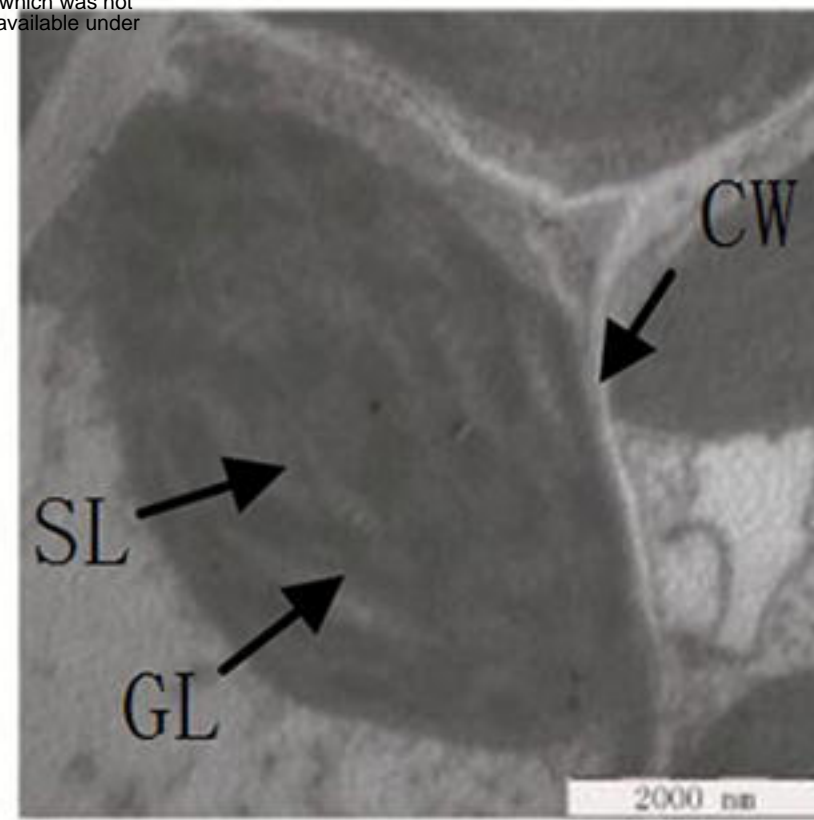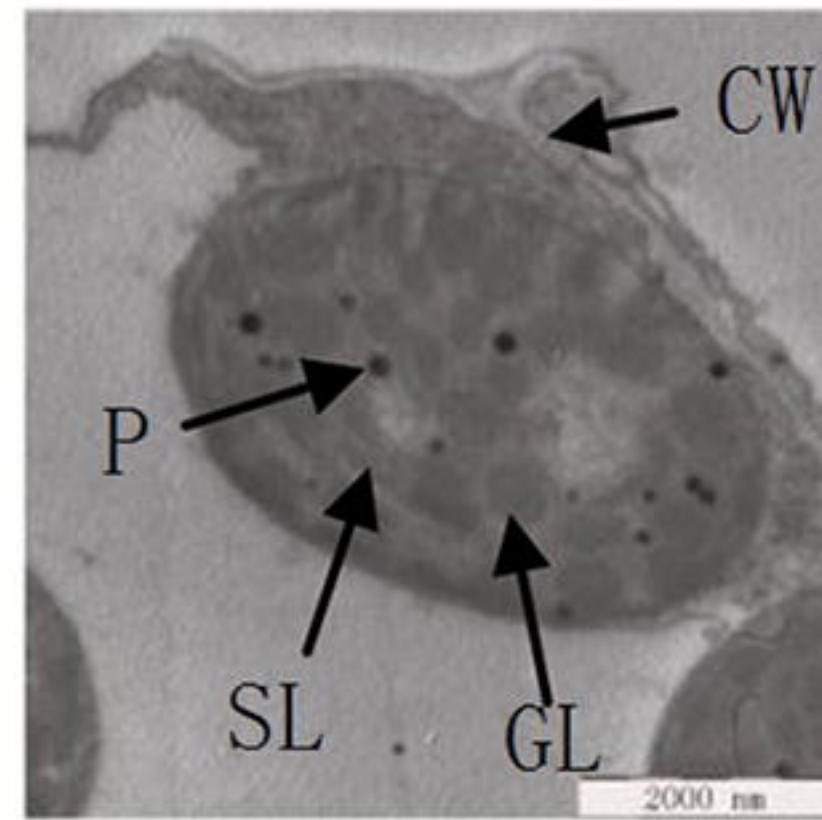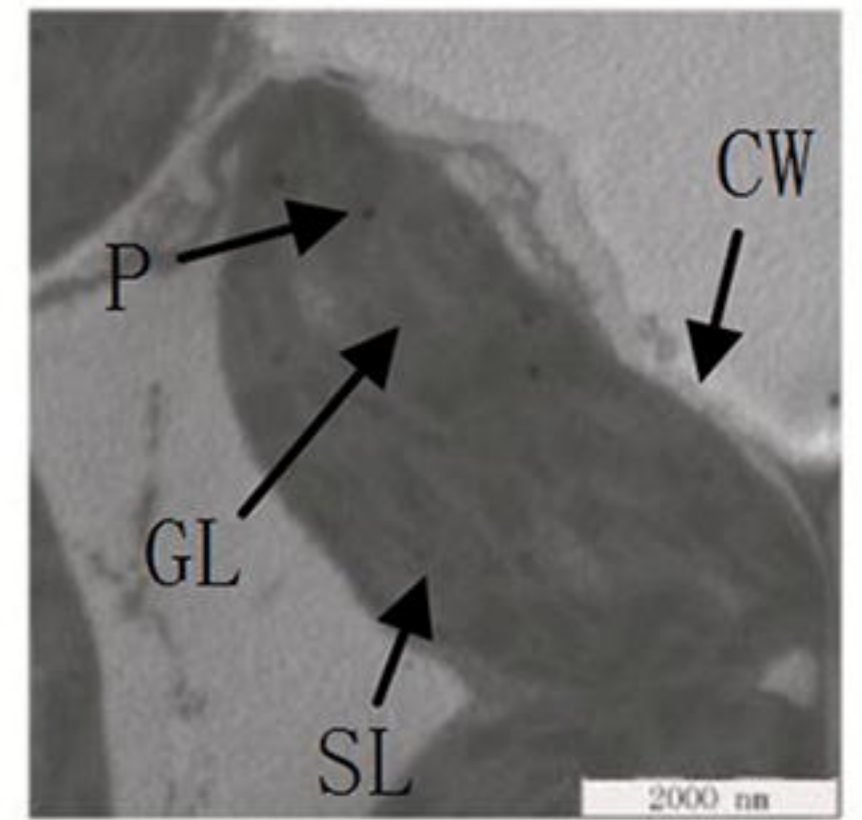

2017

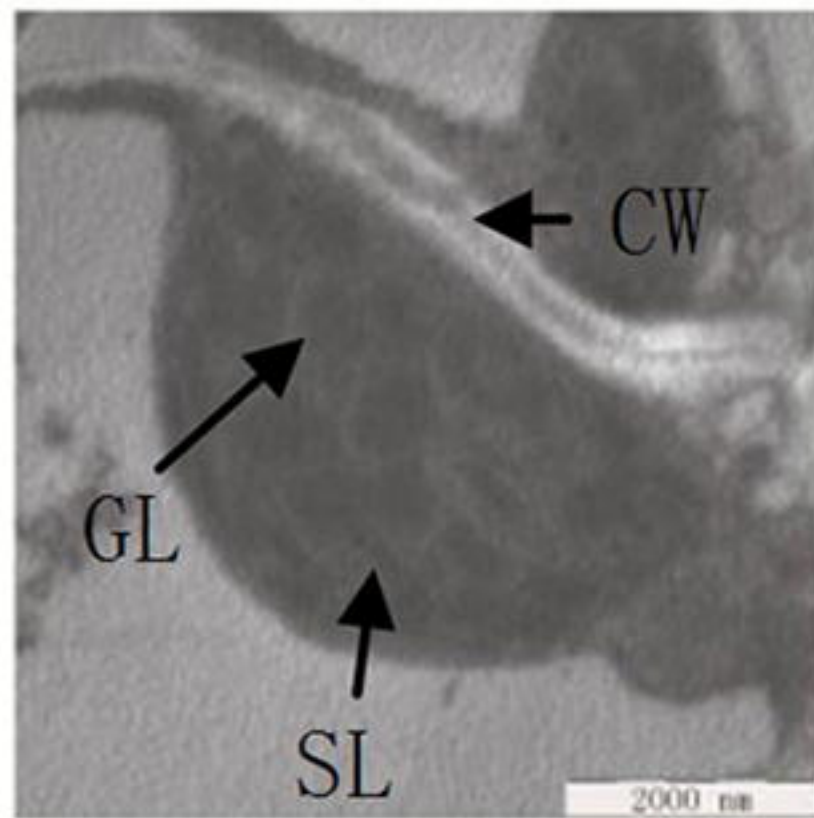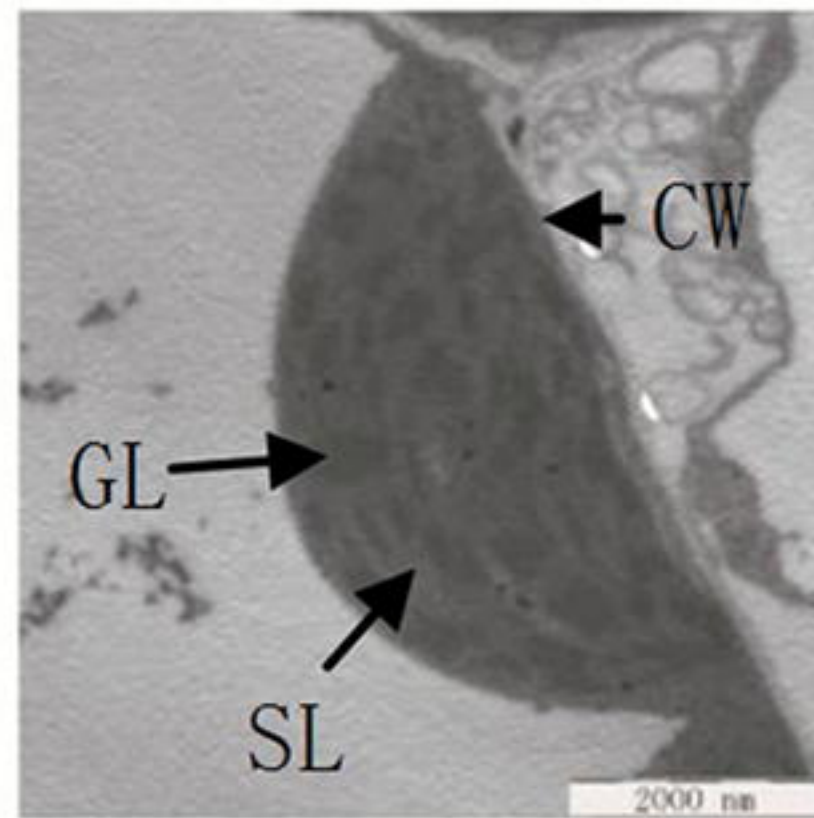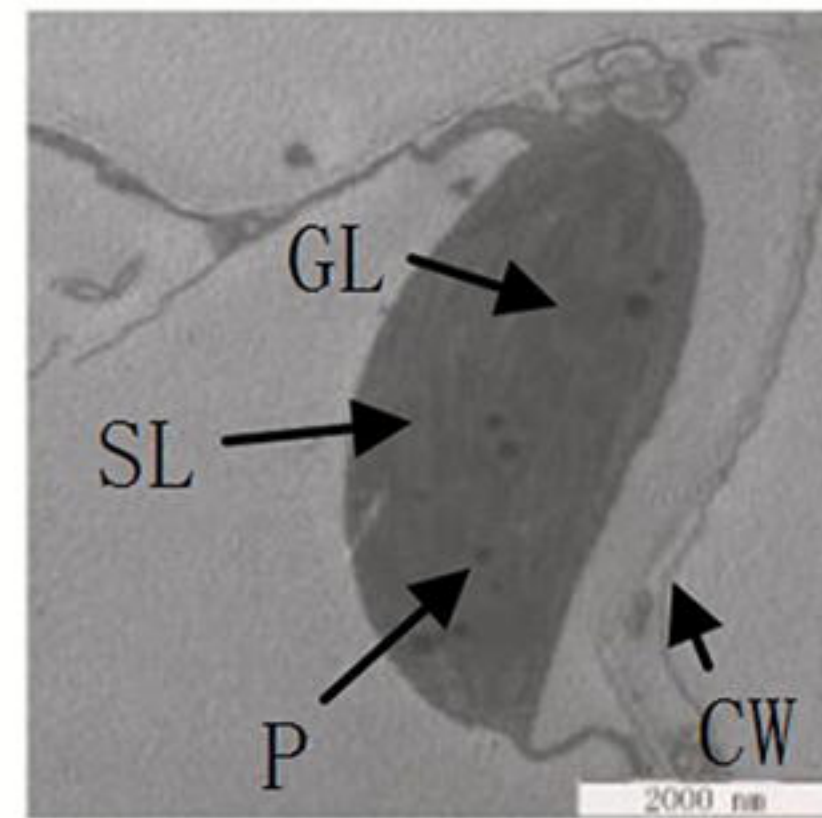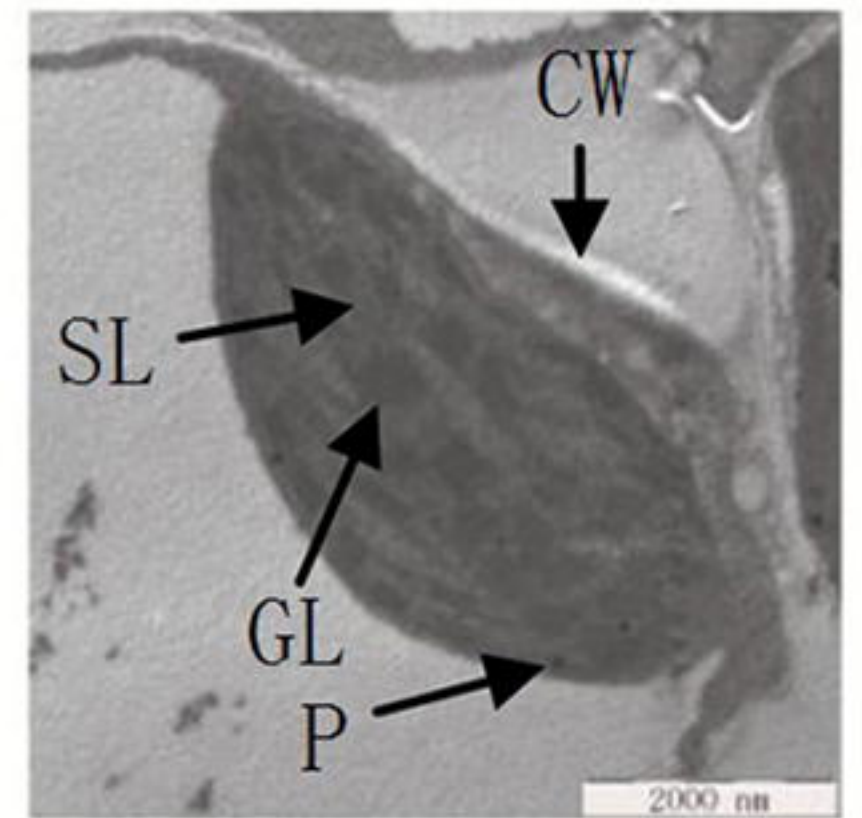

Well-watered

Well-watered

Drought

Drought

+DCPTA

+DCPTA

Well-watered Well-watered+DCPTA Drought Drought+DCPTA

2016

2017

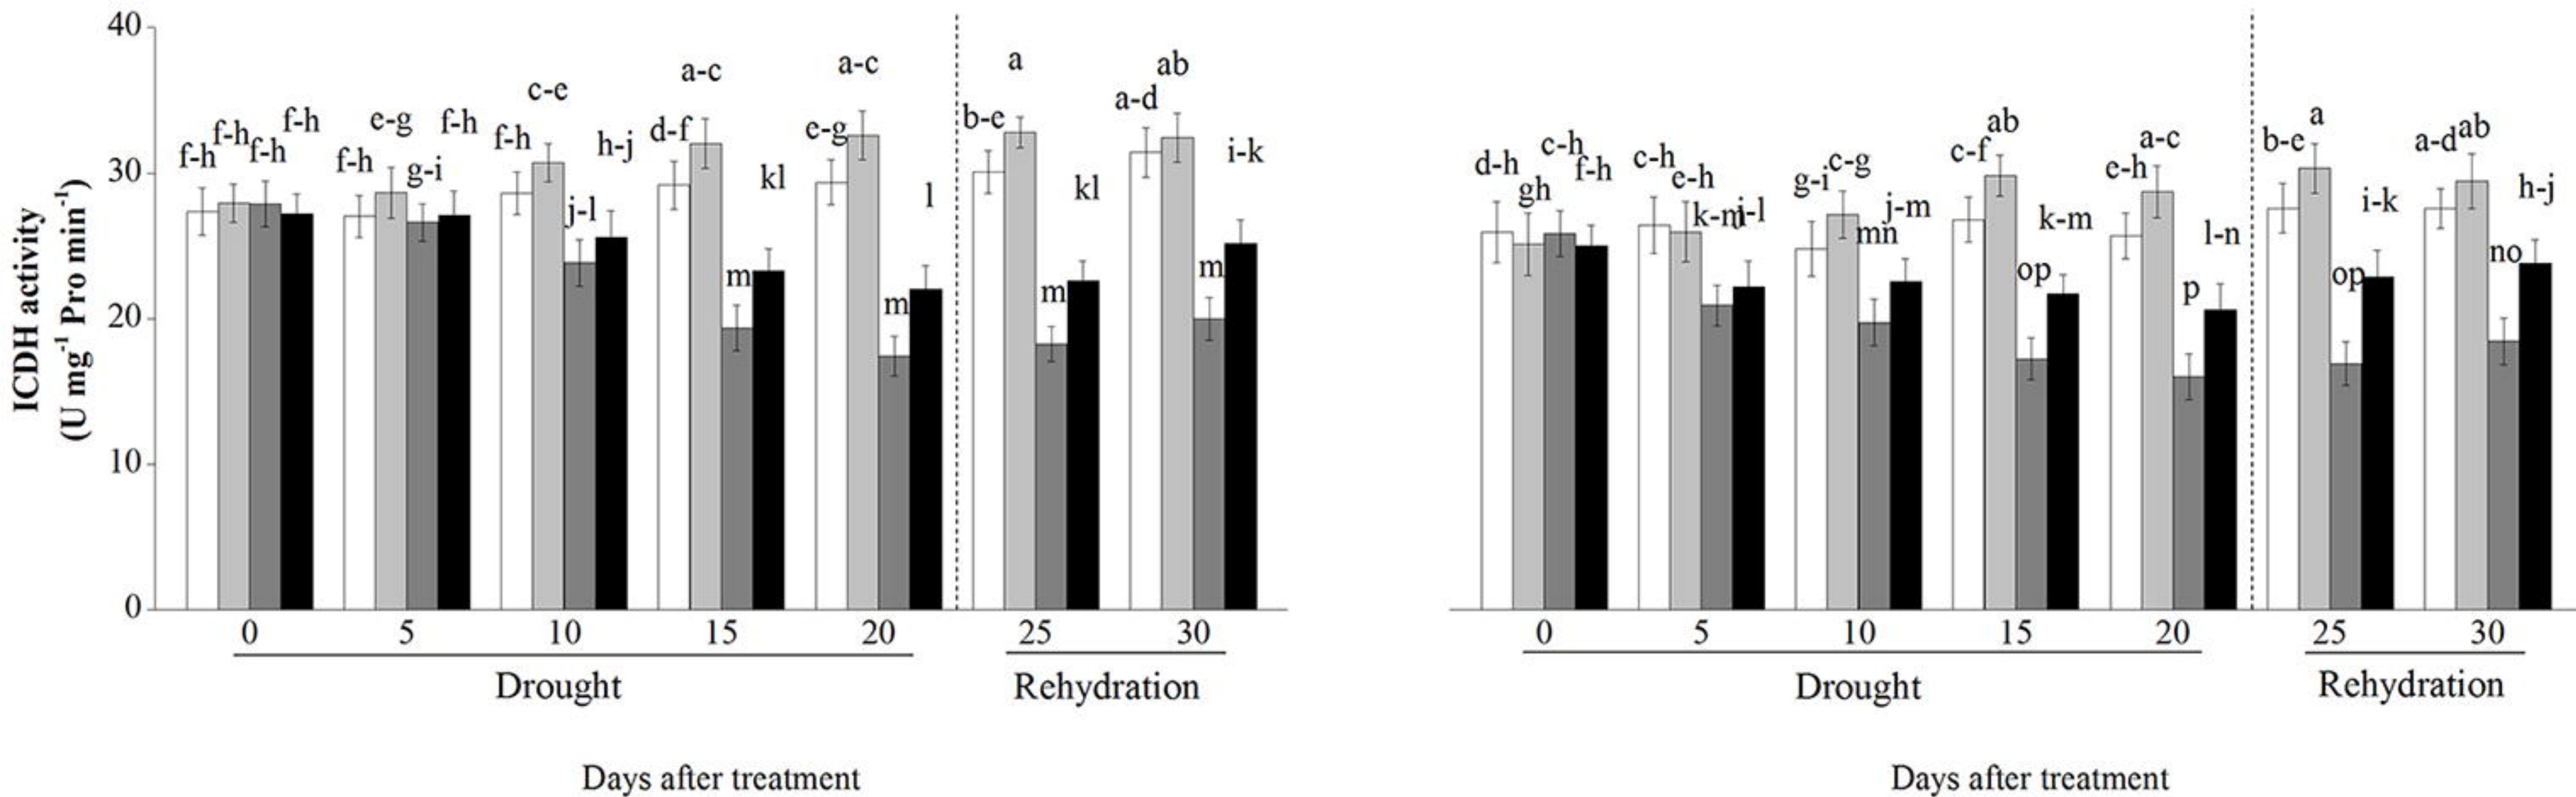



Well-watered Well-watered+DCPTA Drought Drought+DCPTA

2016

2017

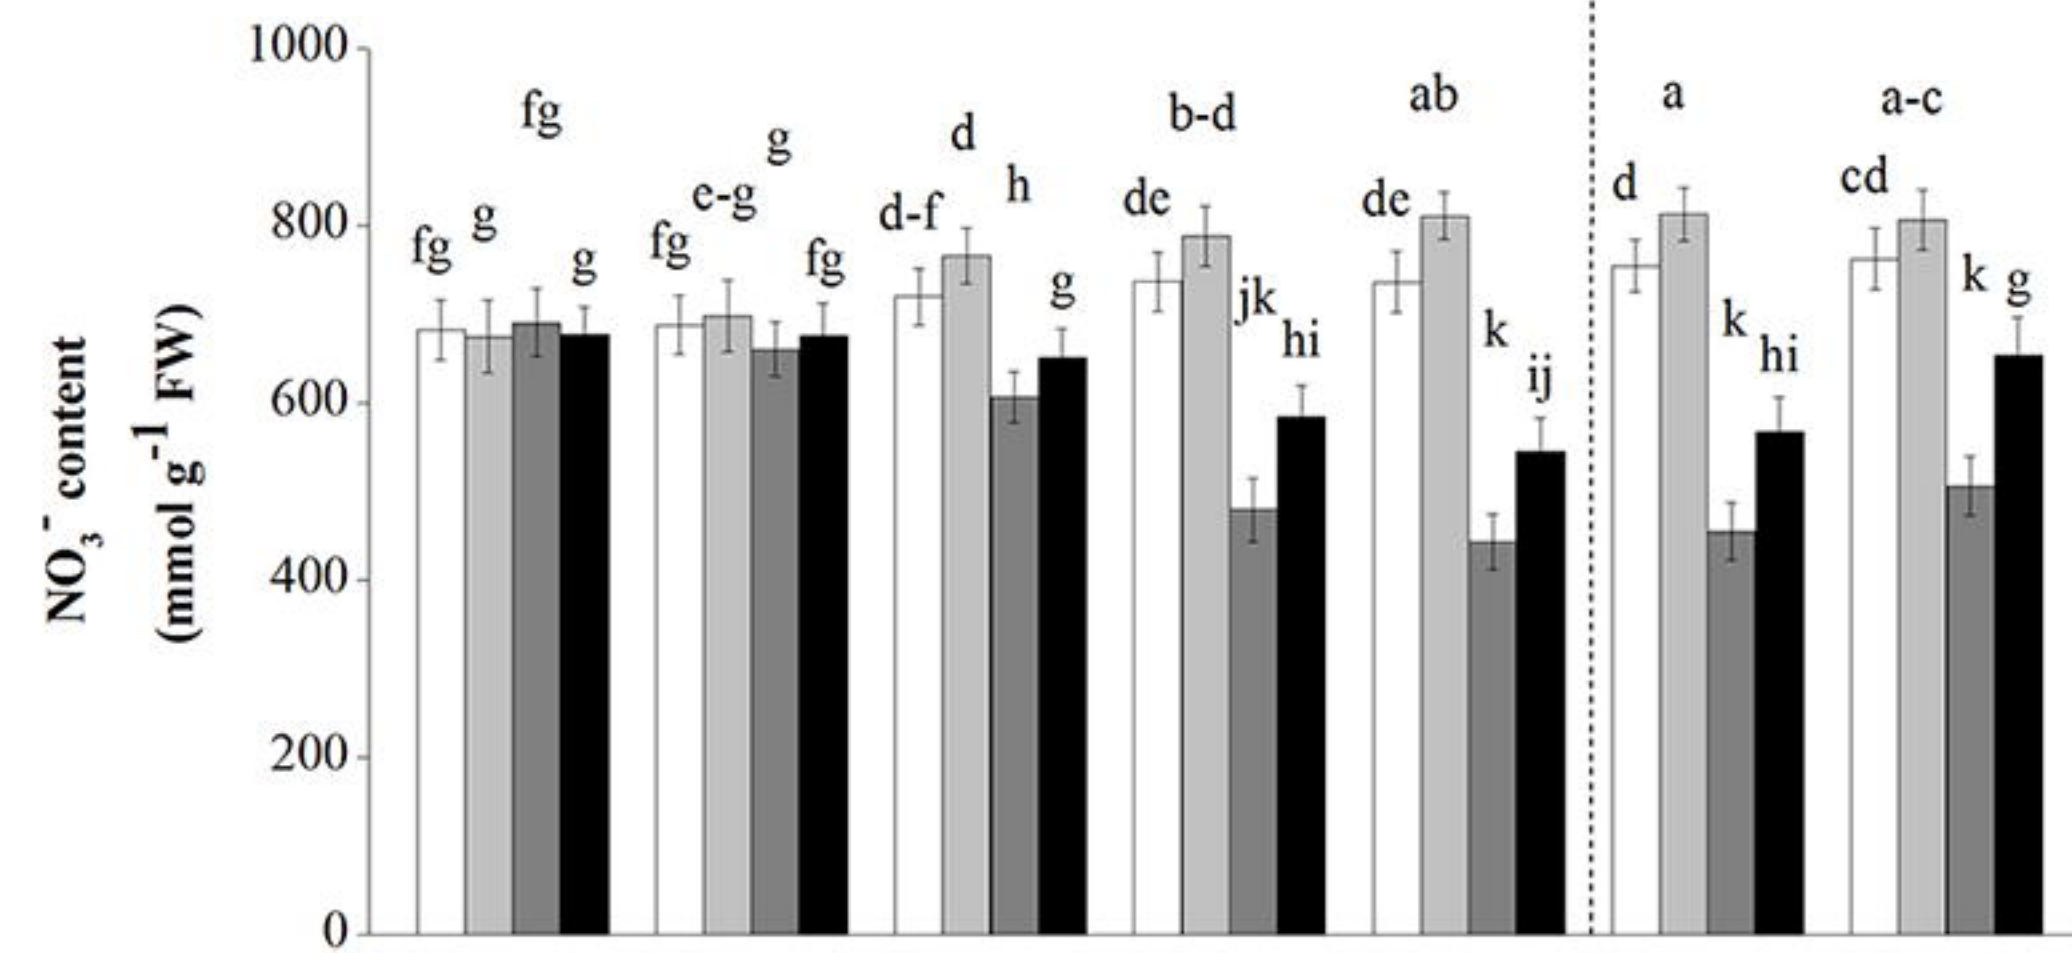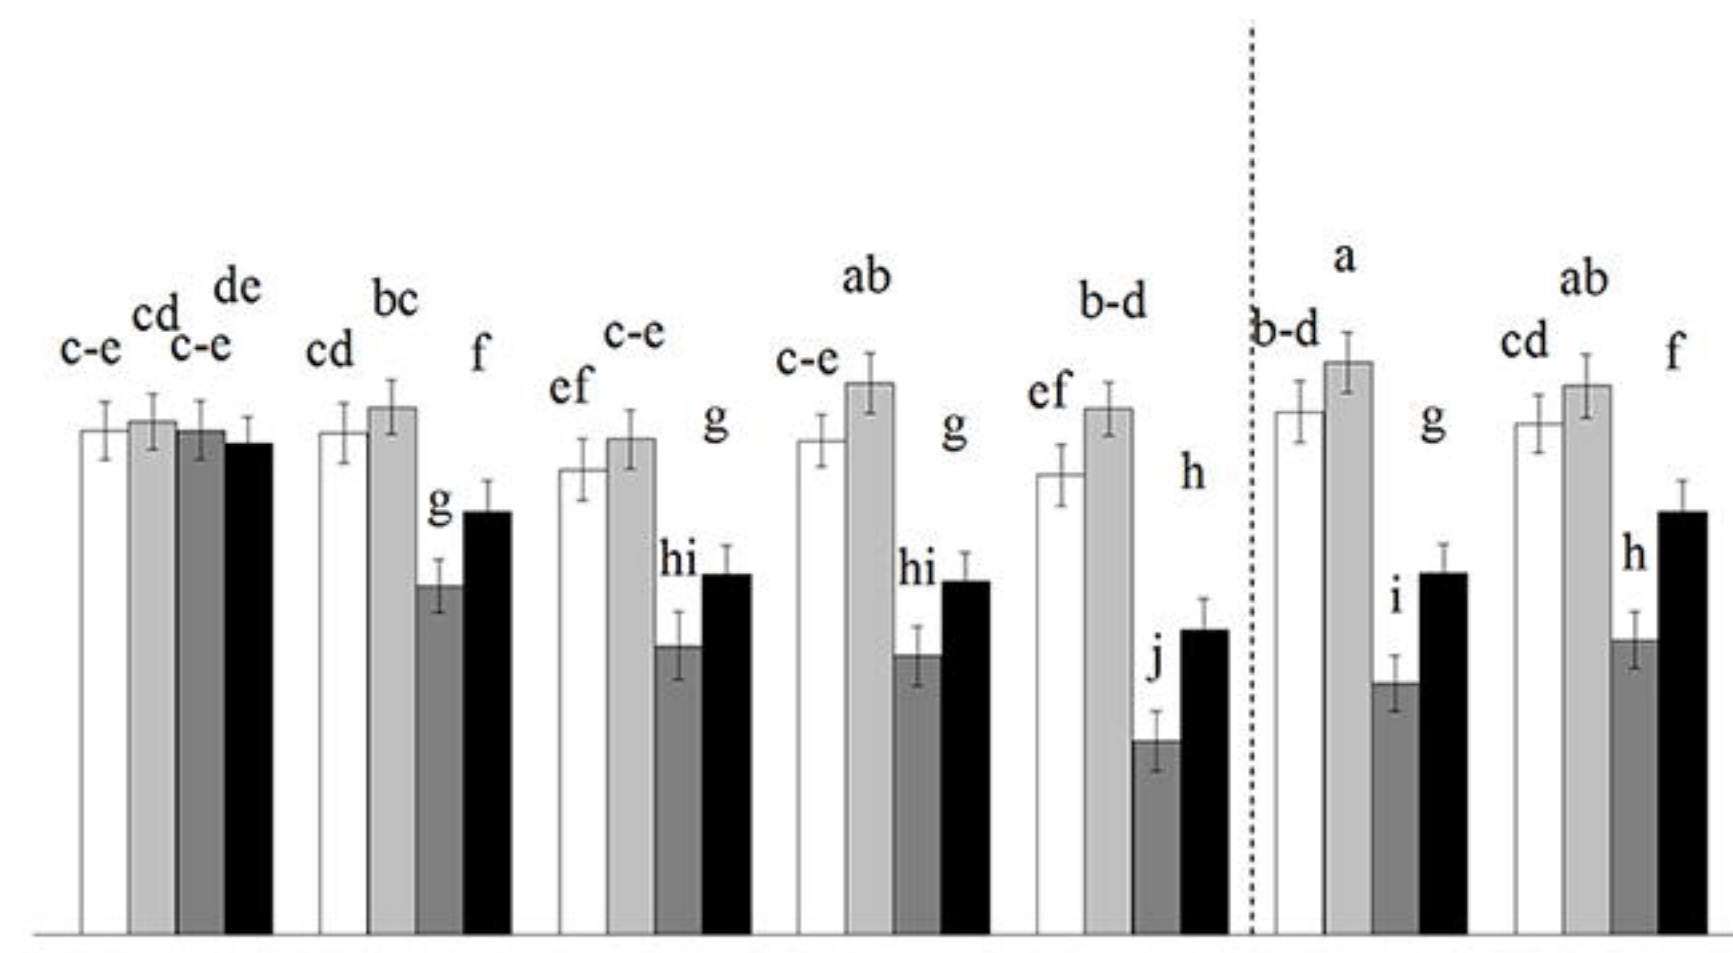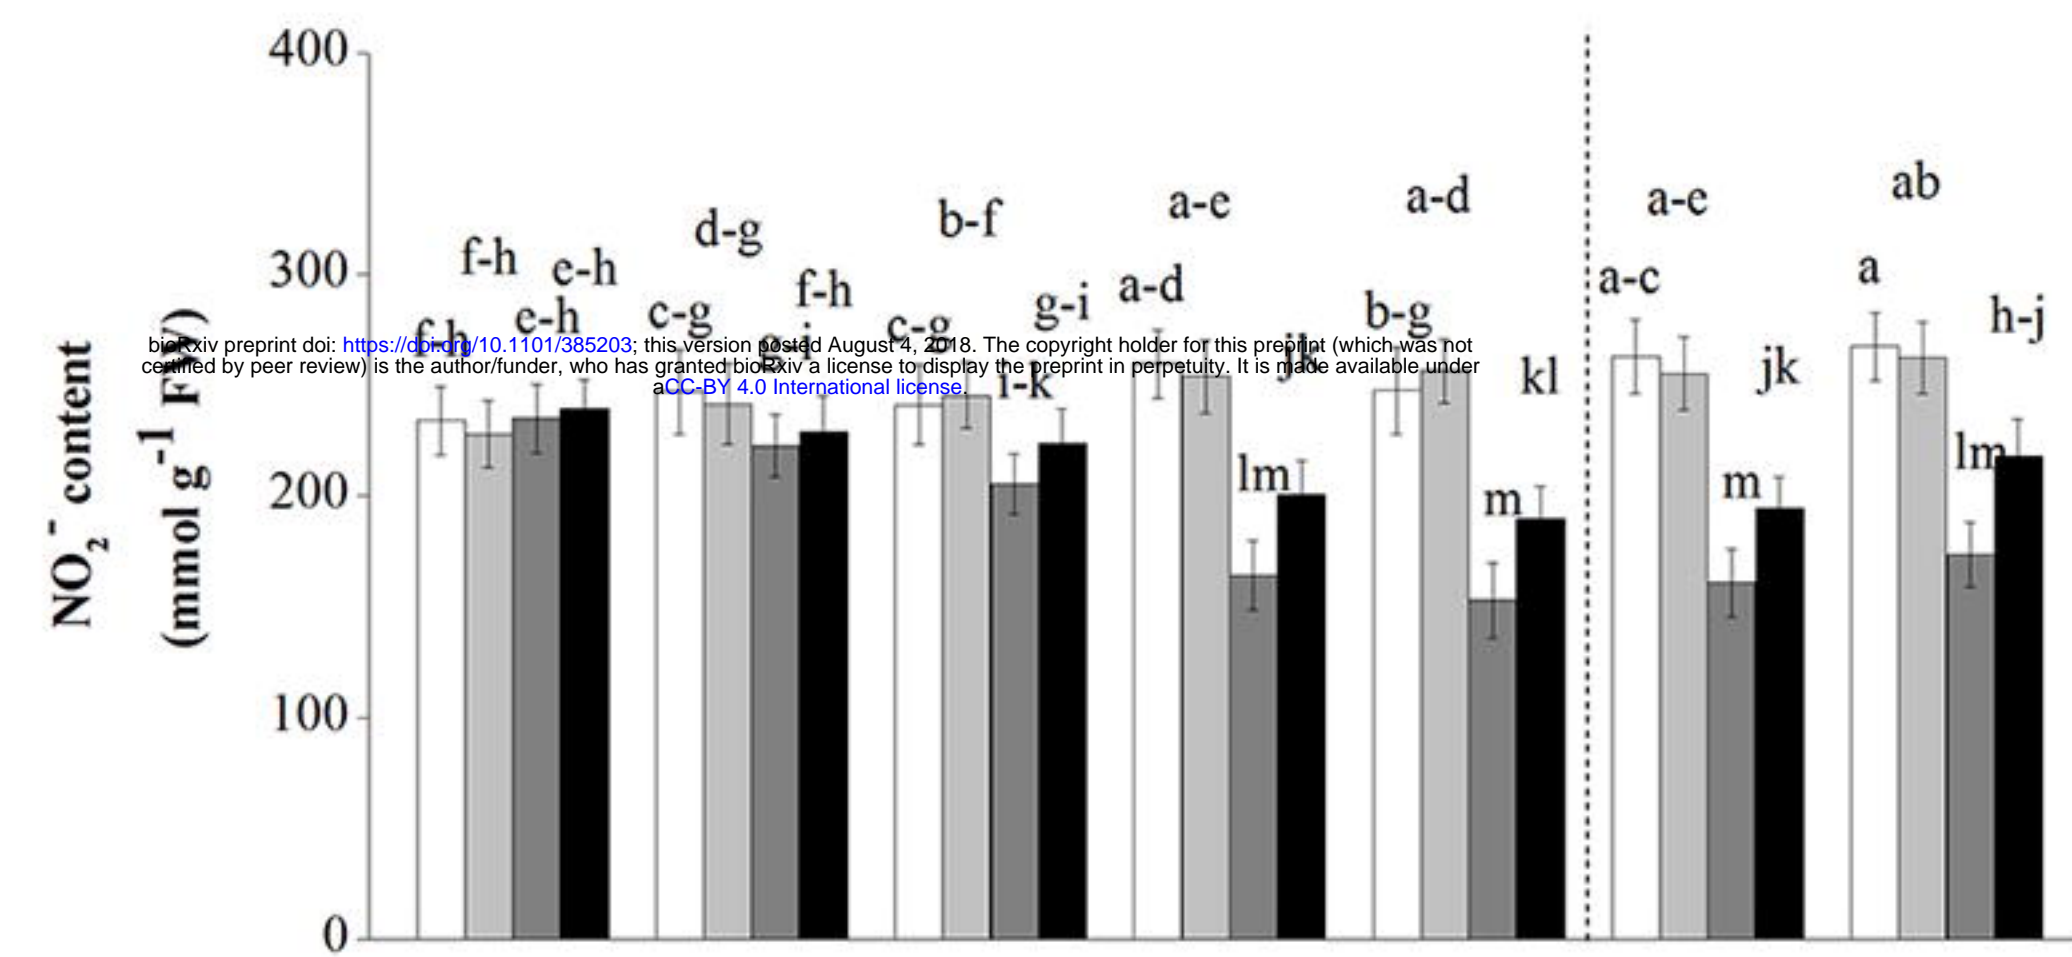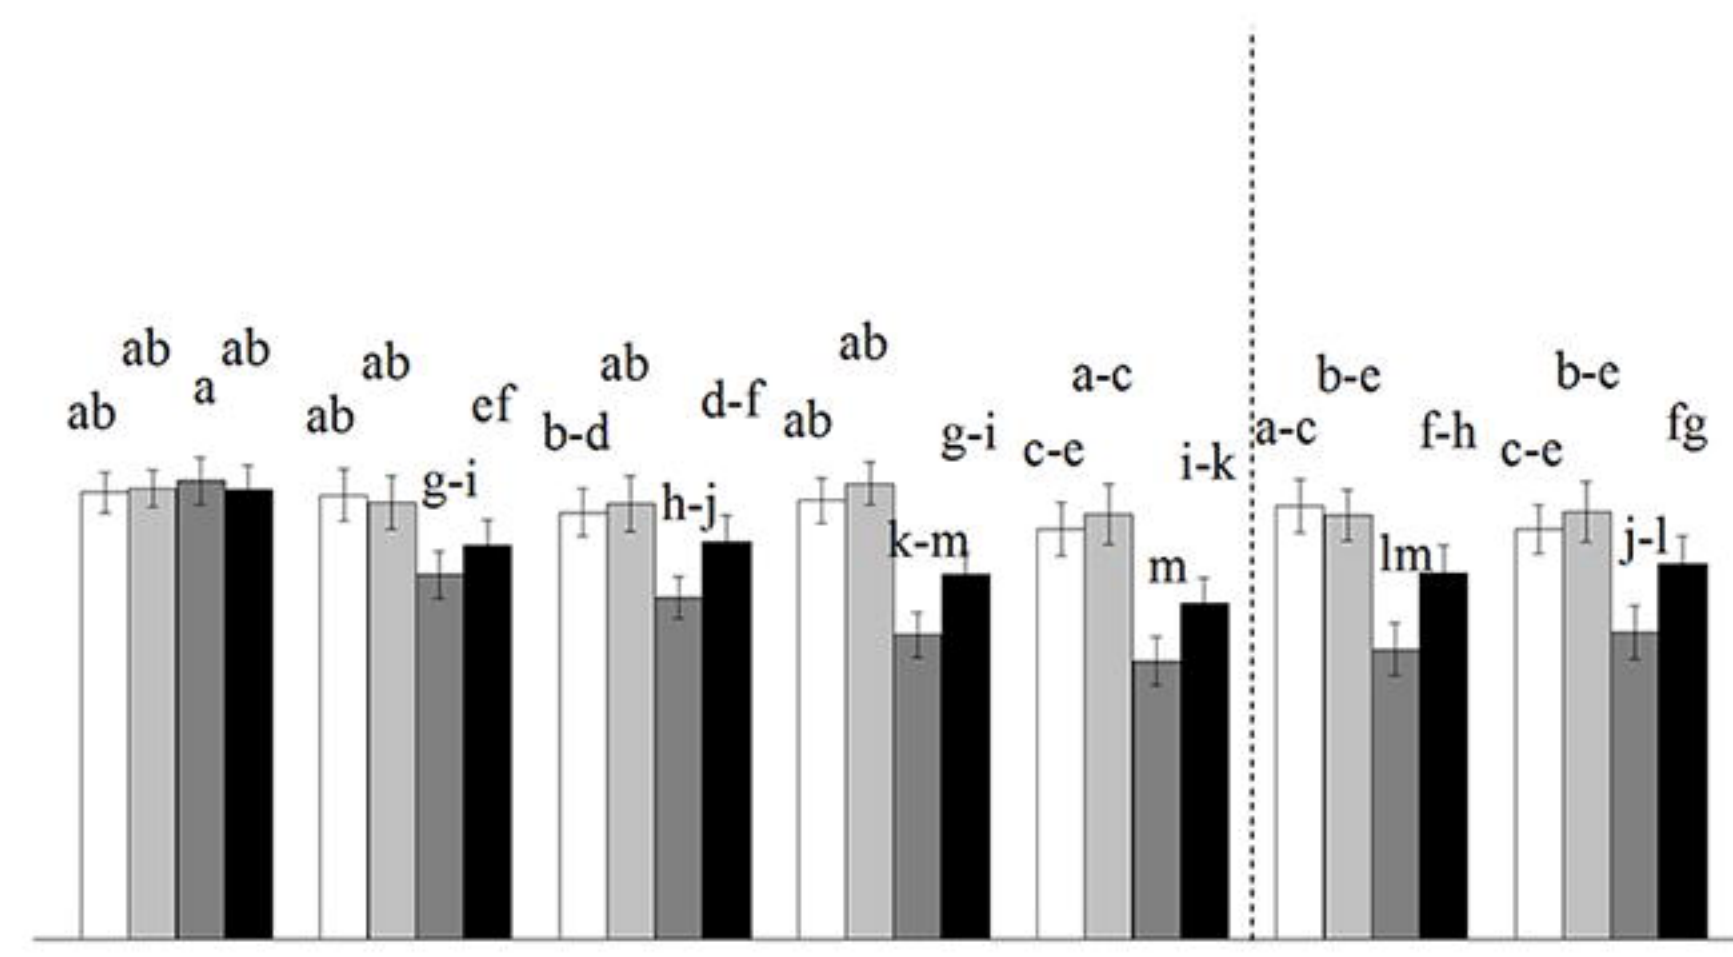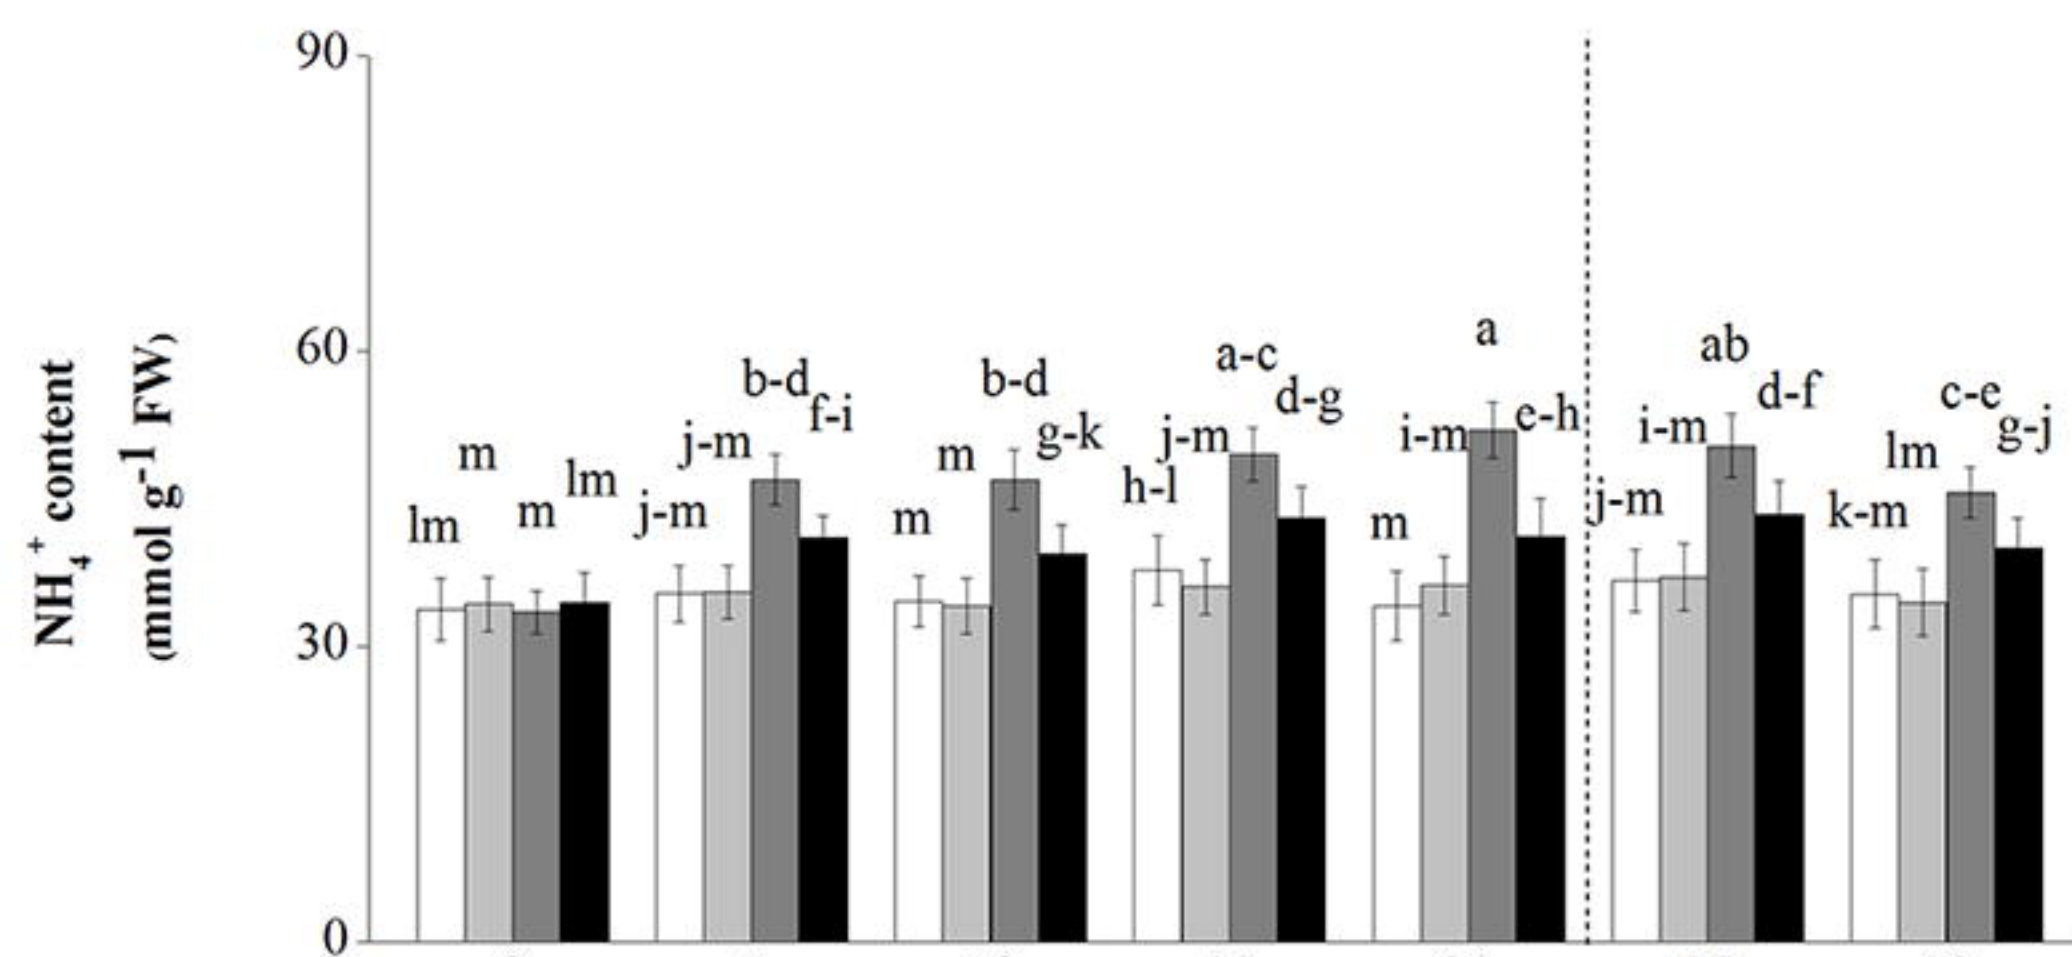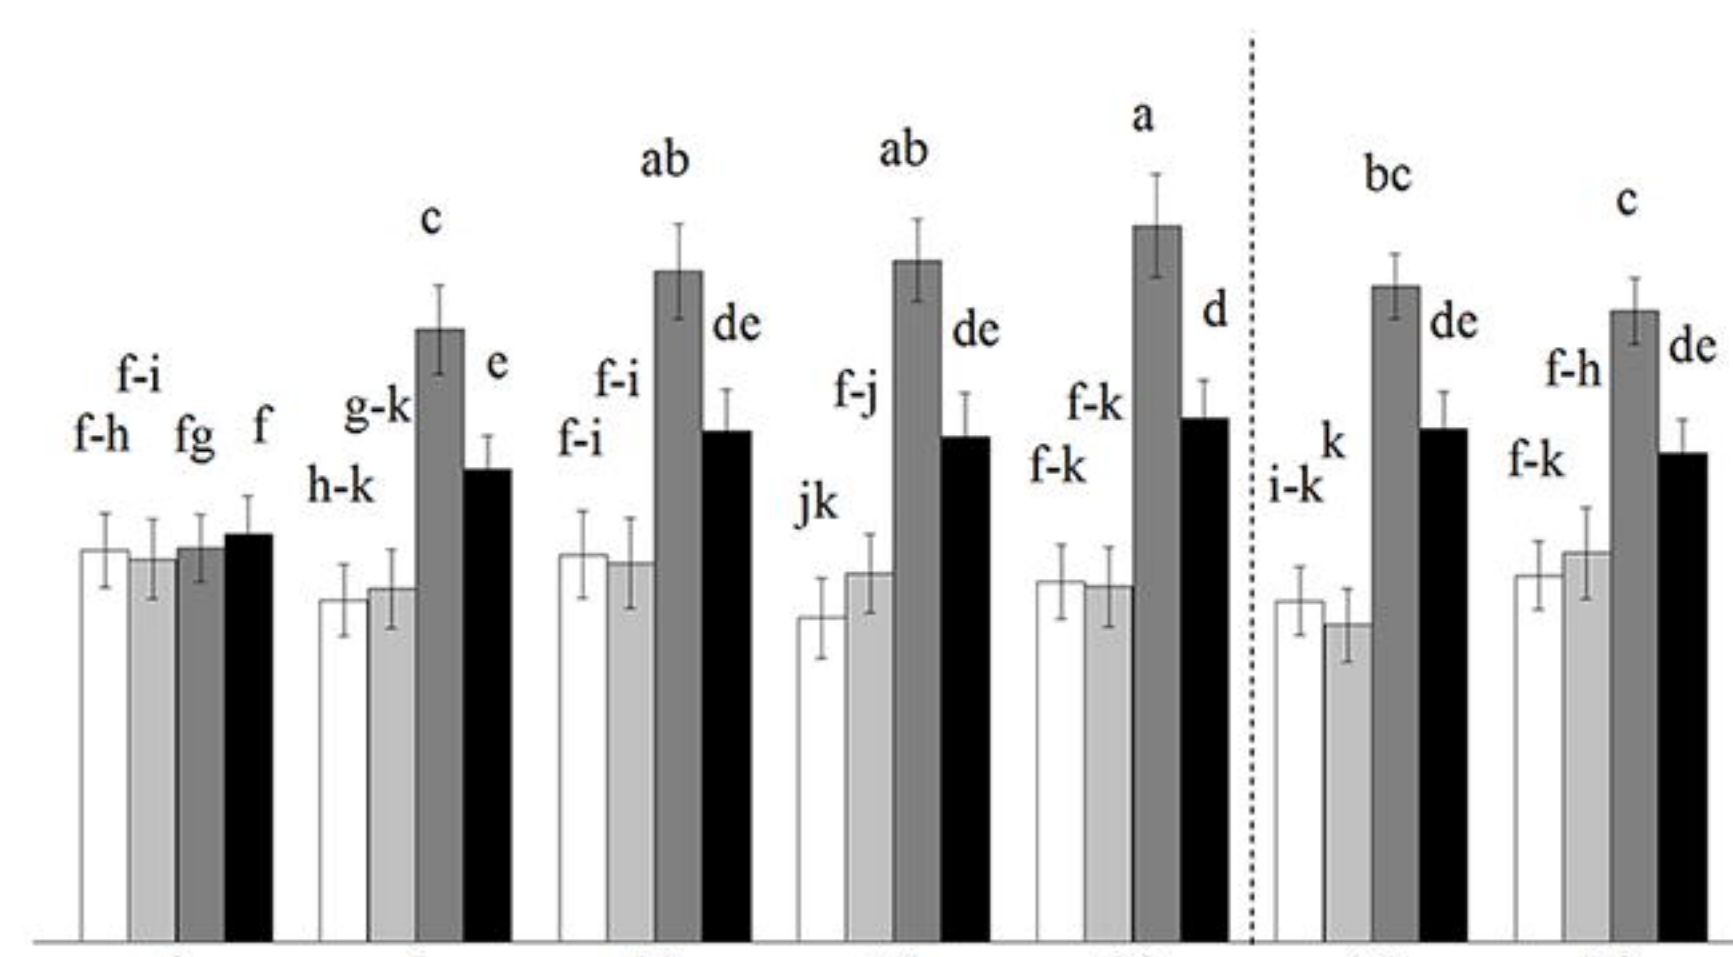

Days after treatment

Days after treatment

Well-watered Well-watered+DCPTA Drought Drought+DCPTA

2016

2017

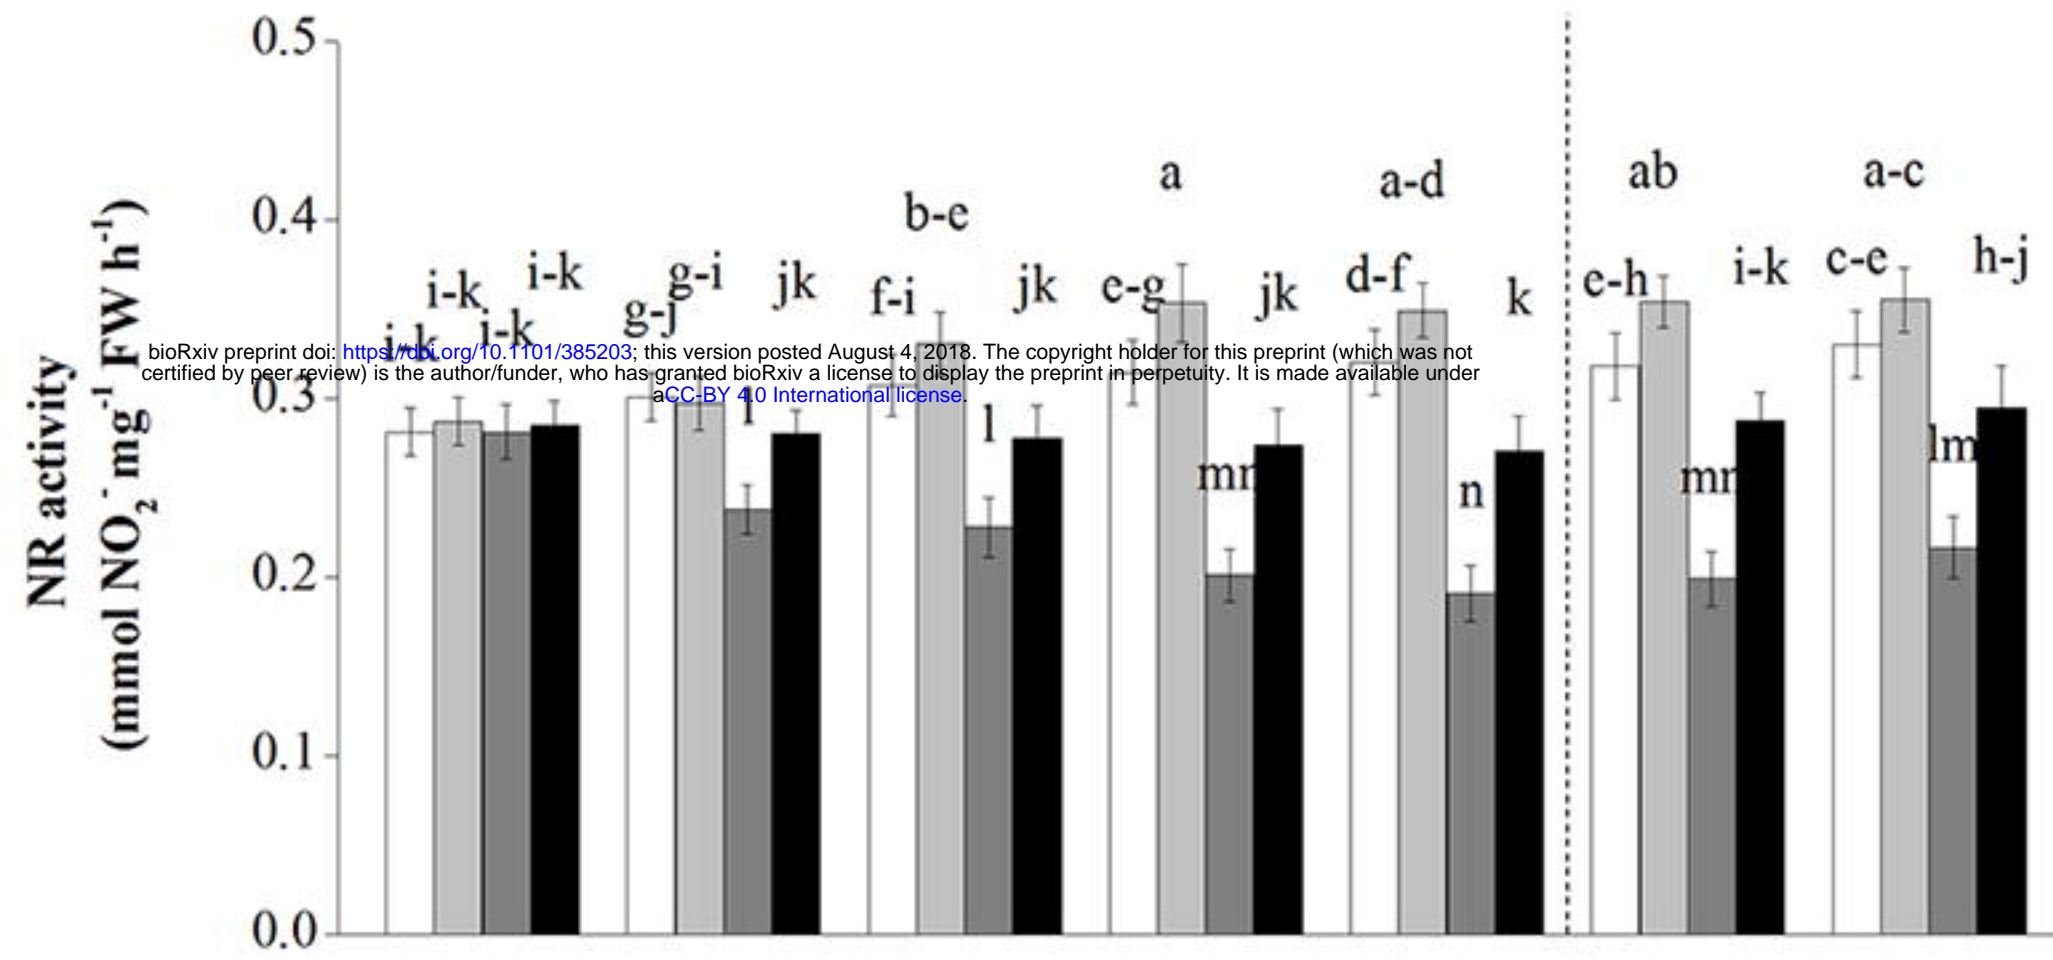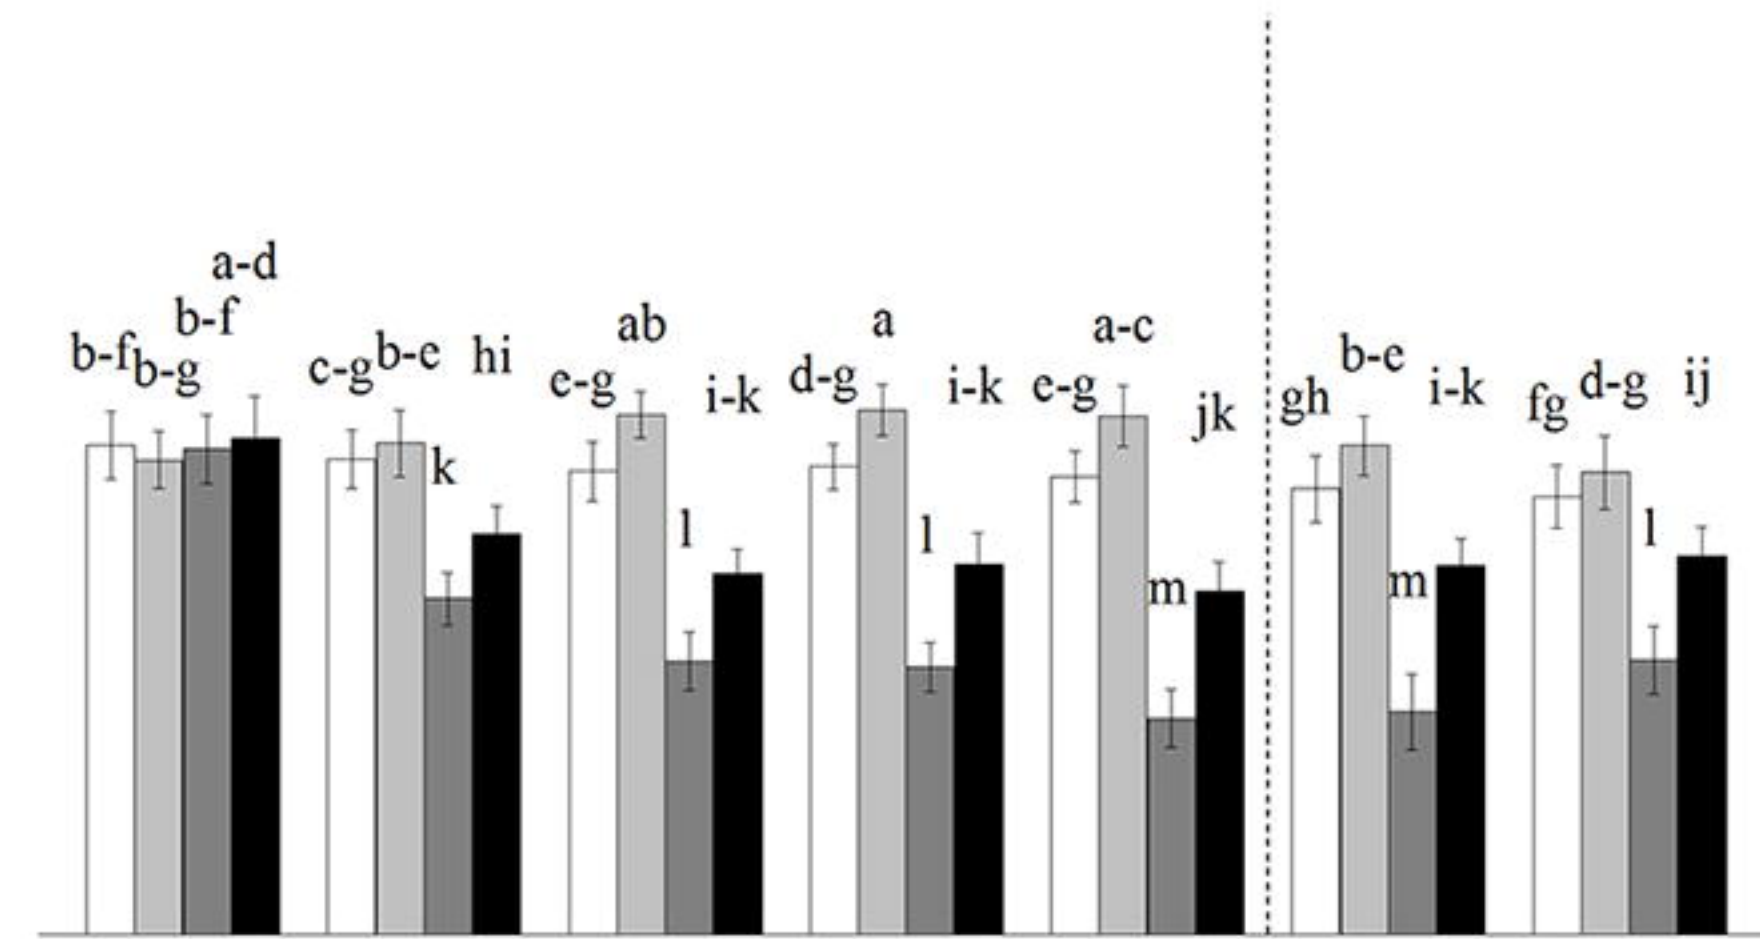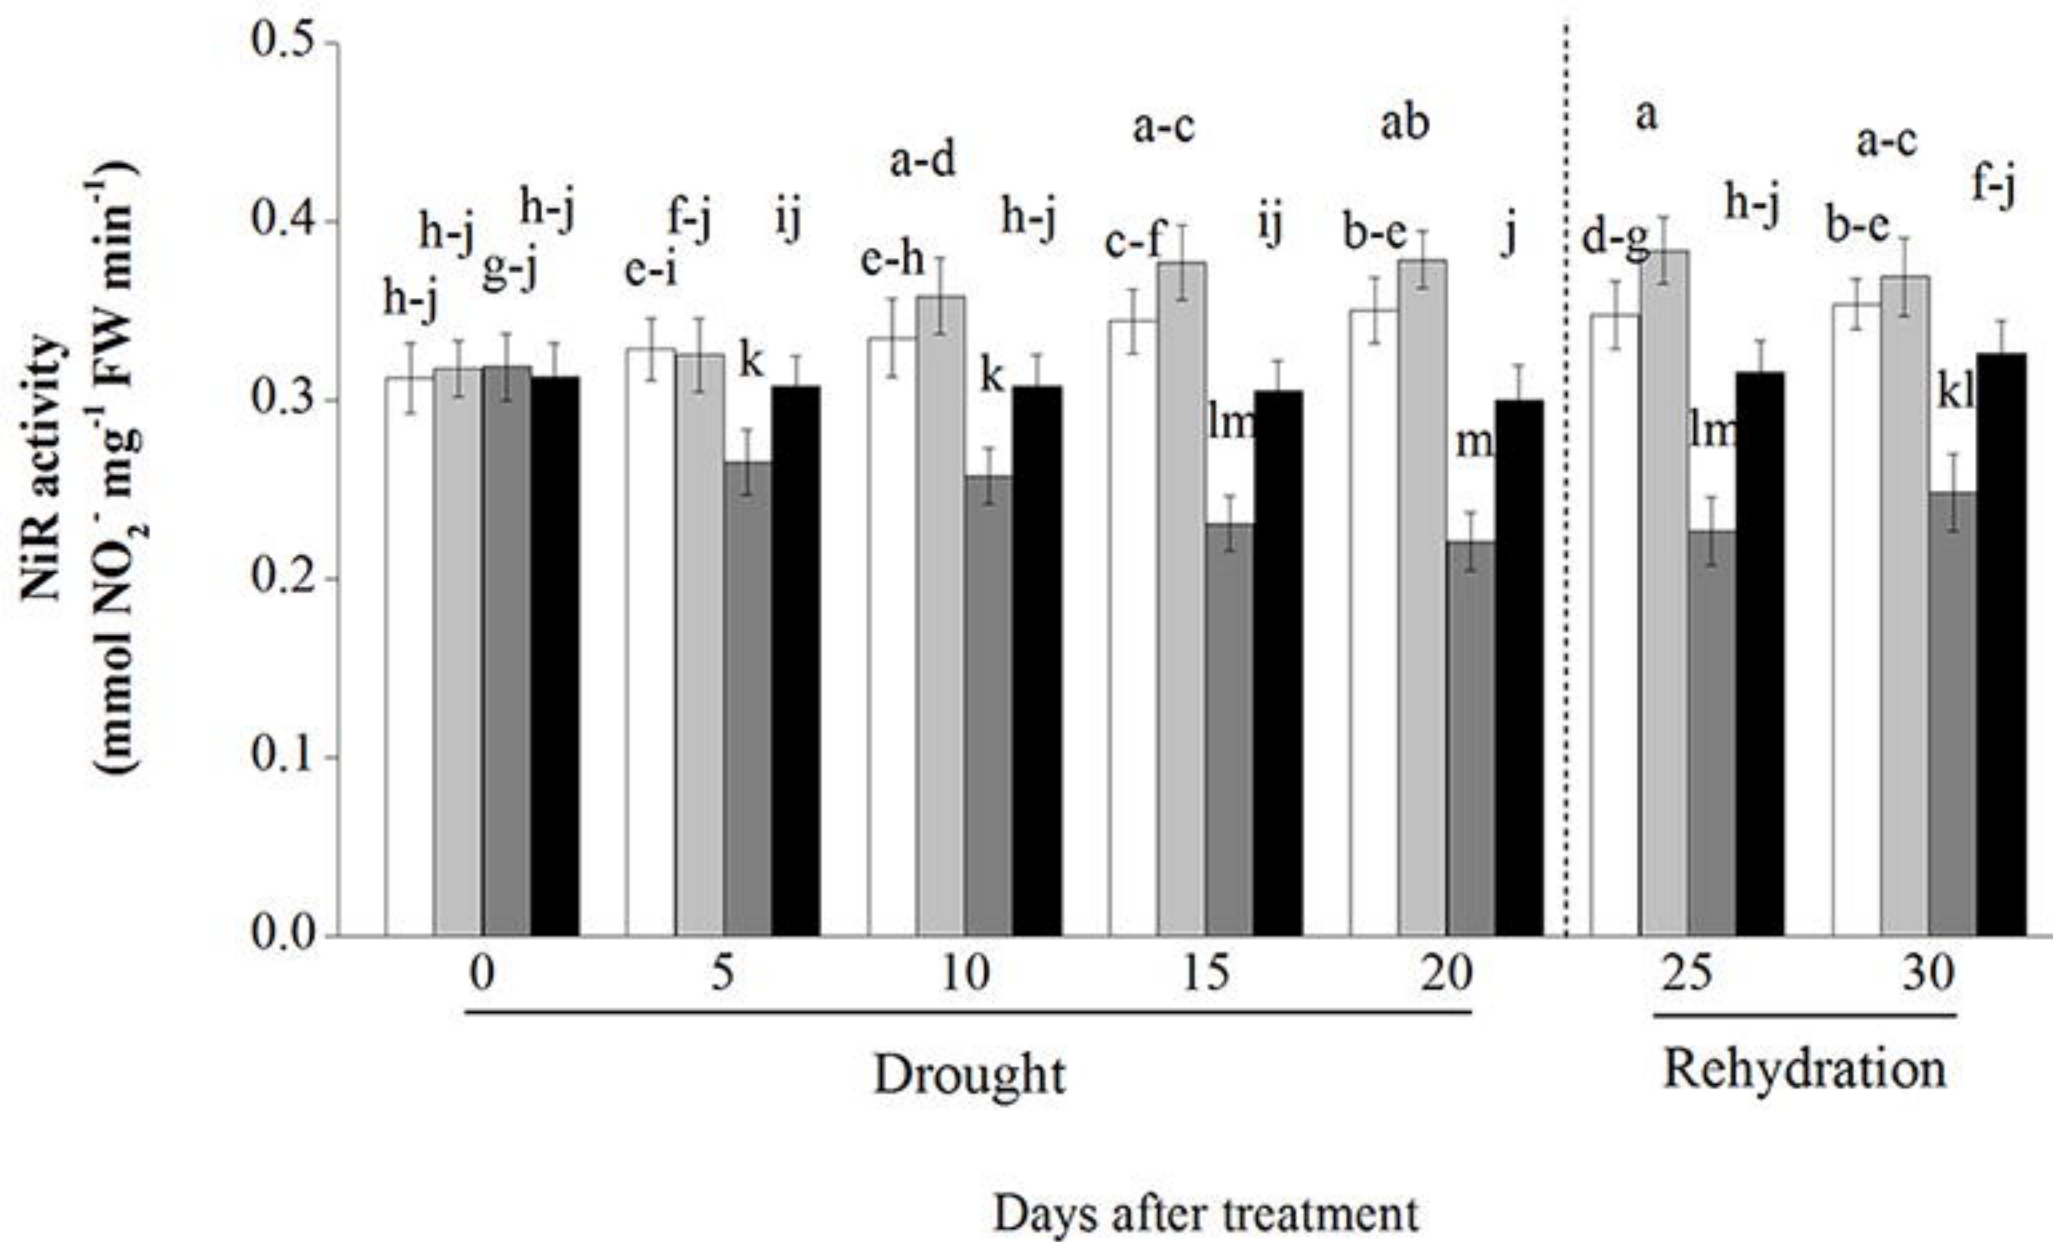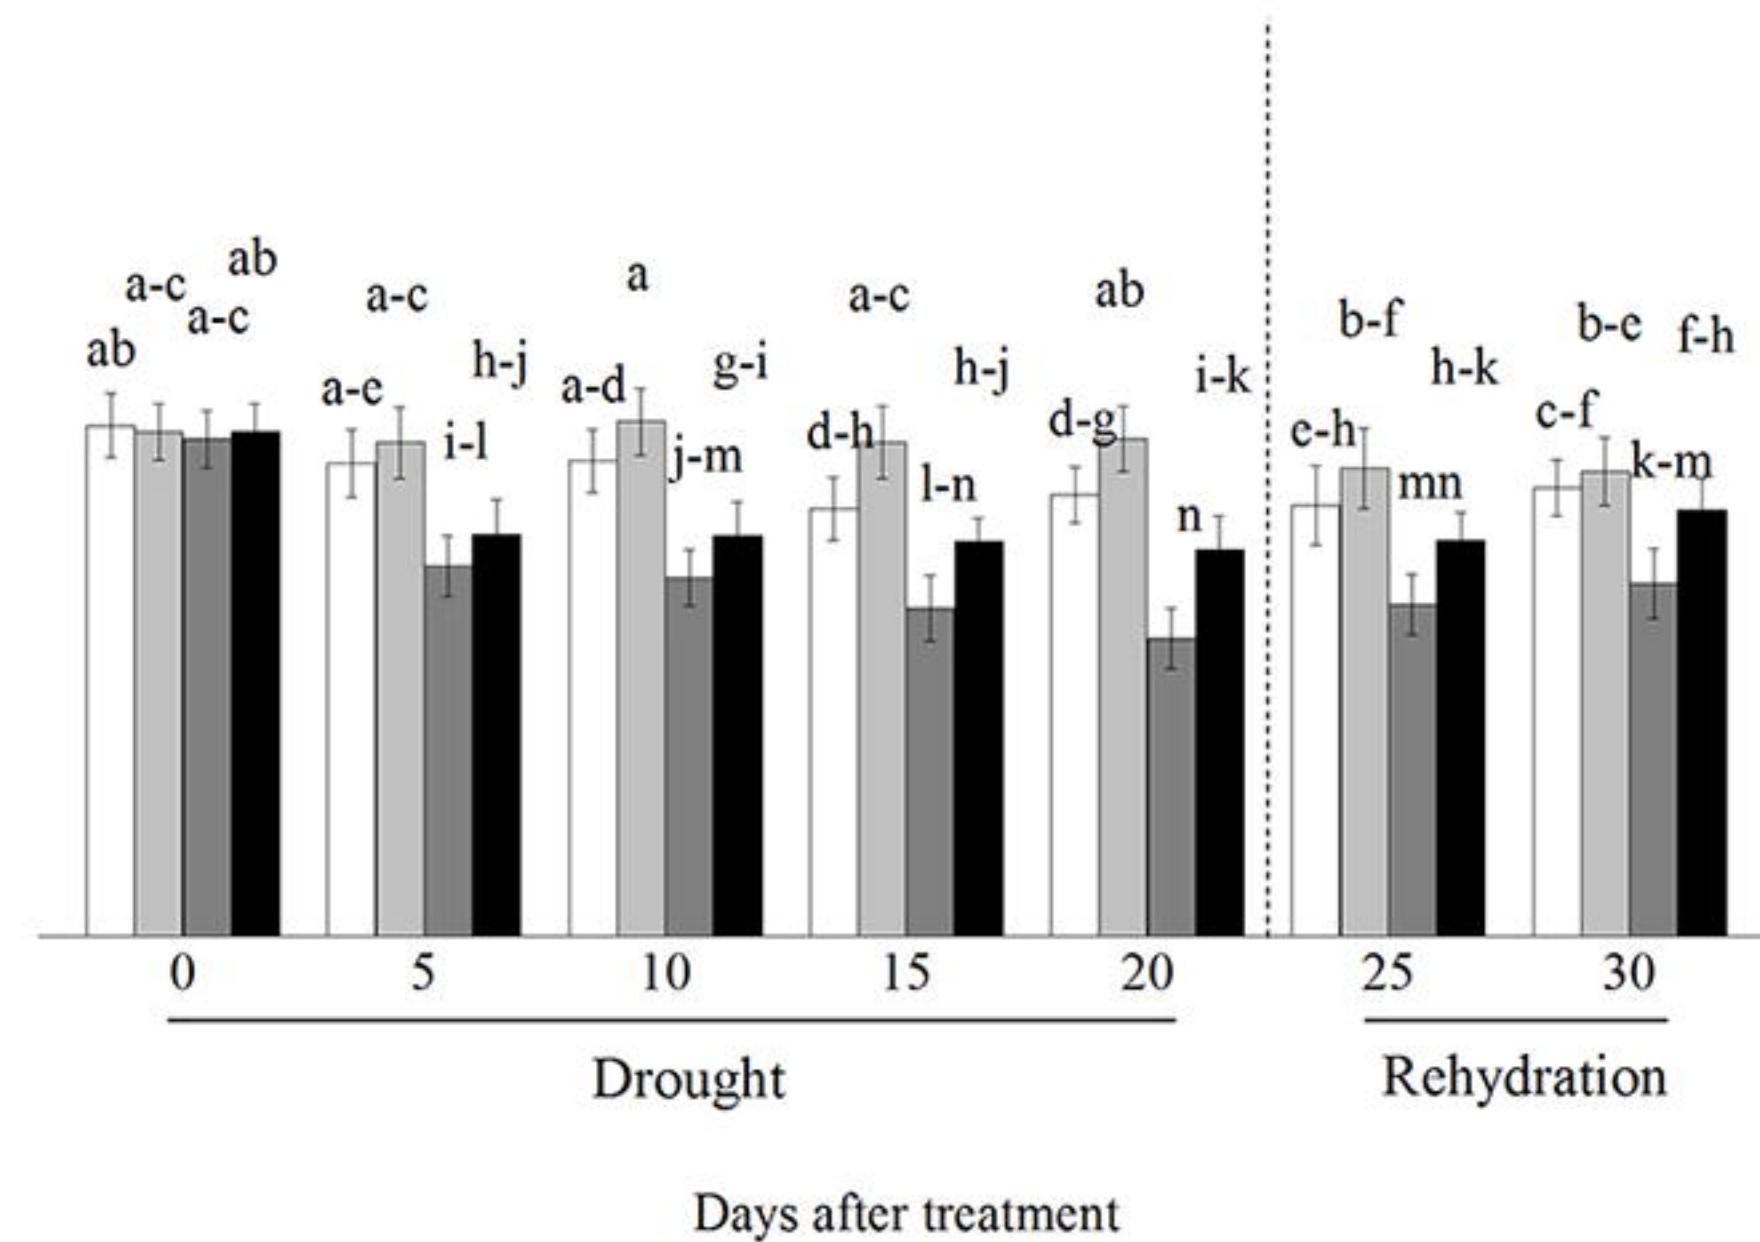

Well-watered Well-watered+DCPTA Drought Drought+DCPTA

2016

2017

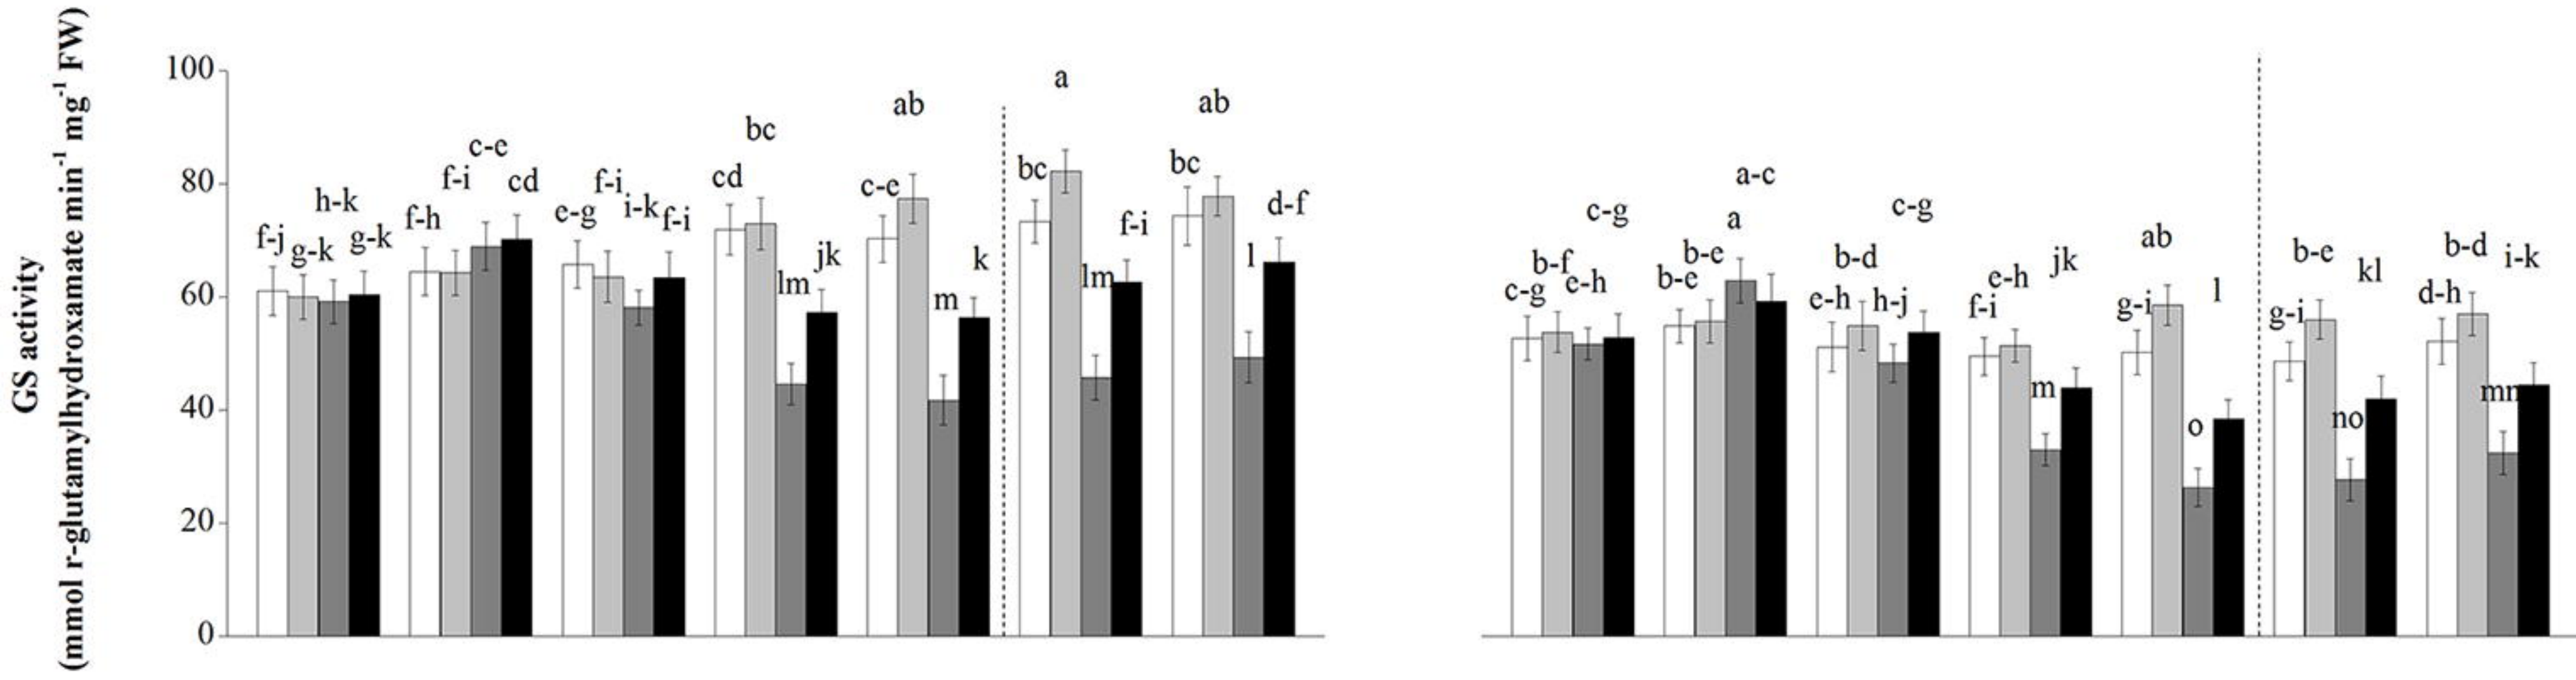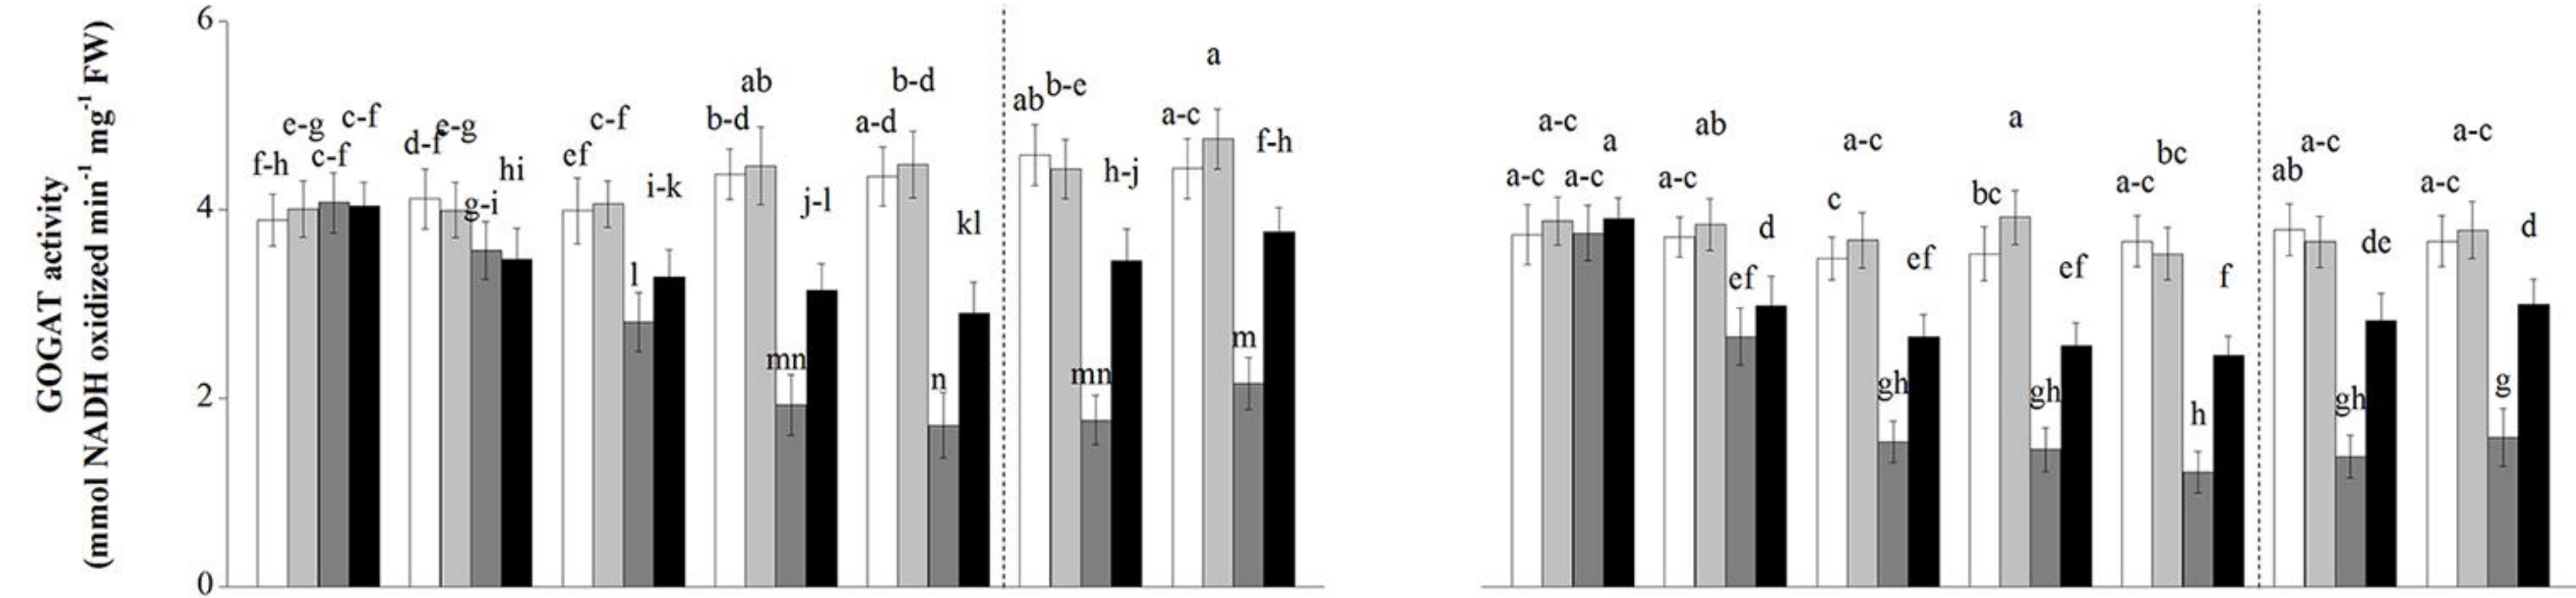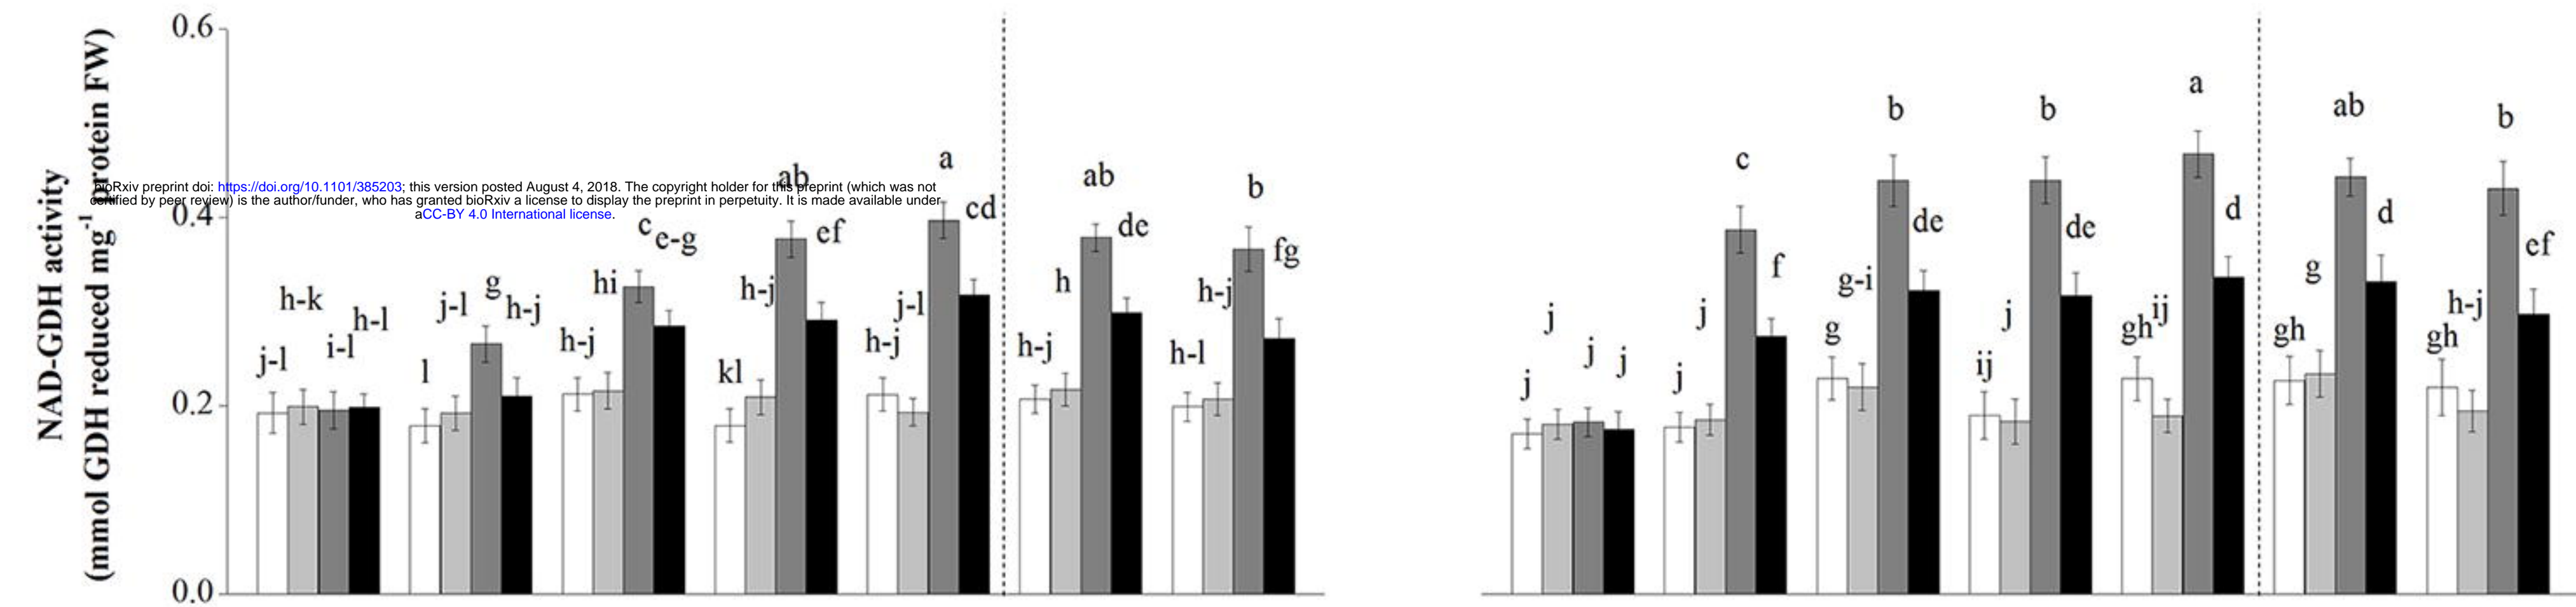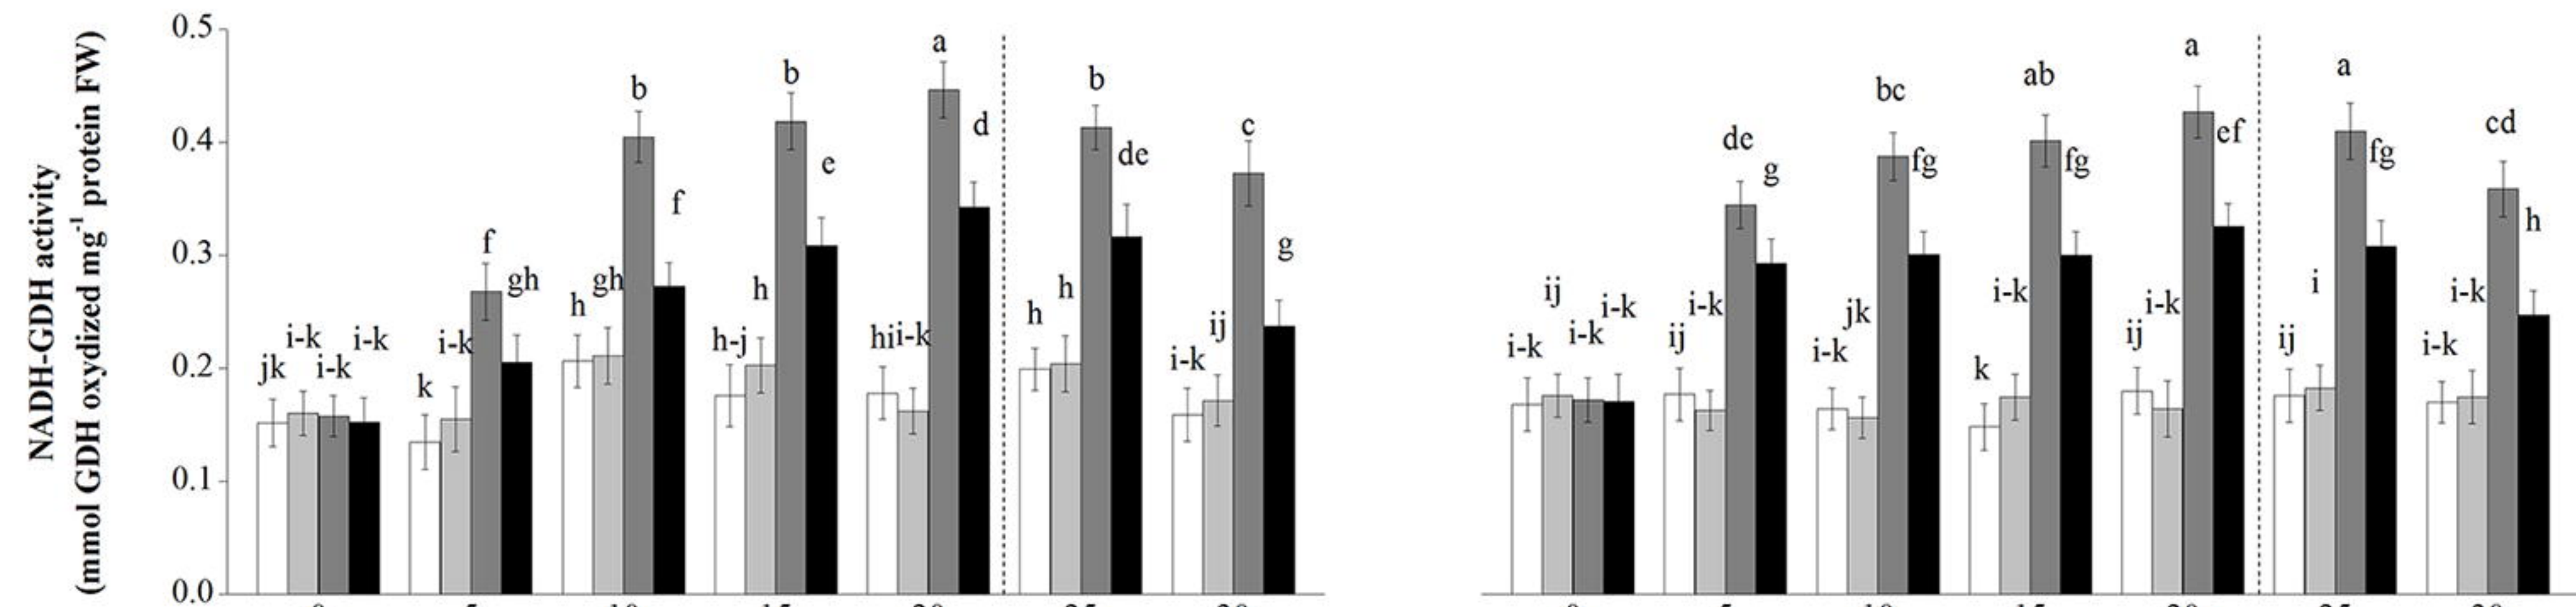

Days after treatment

Days after treatment

Well-watered Well-watered+DCPTA Drought Drought+DCPTA

2016

2017

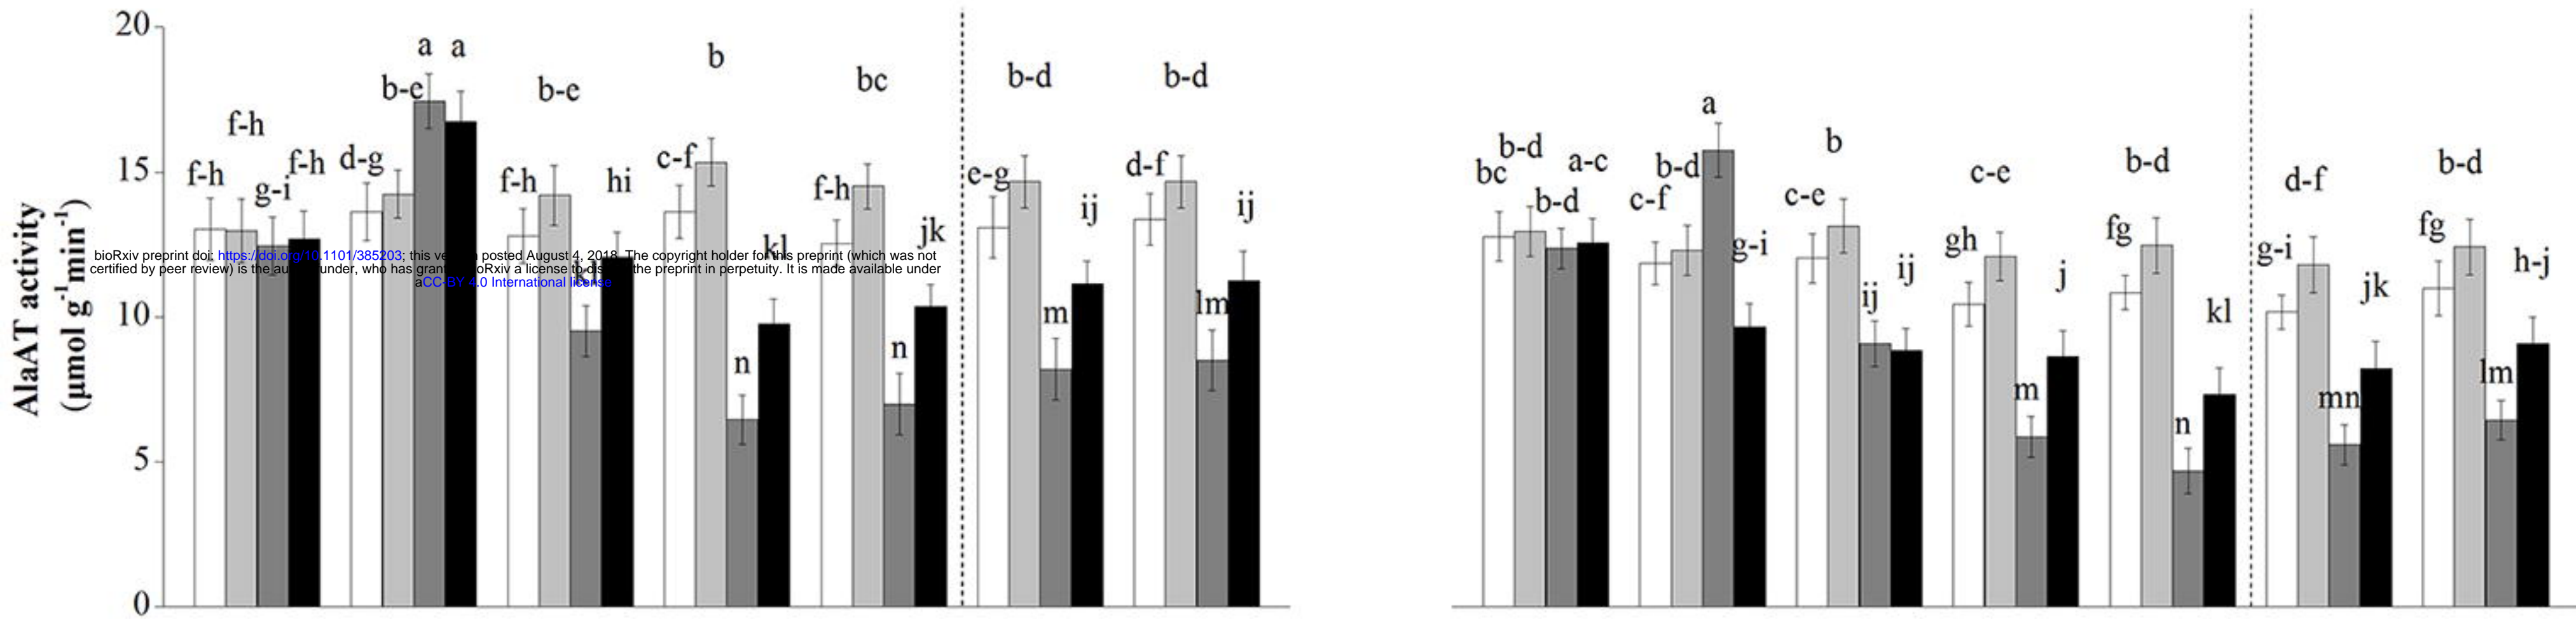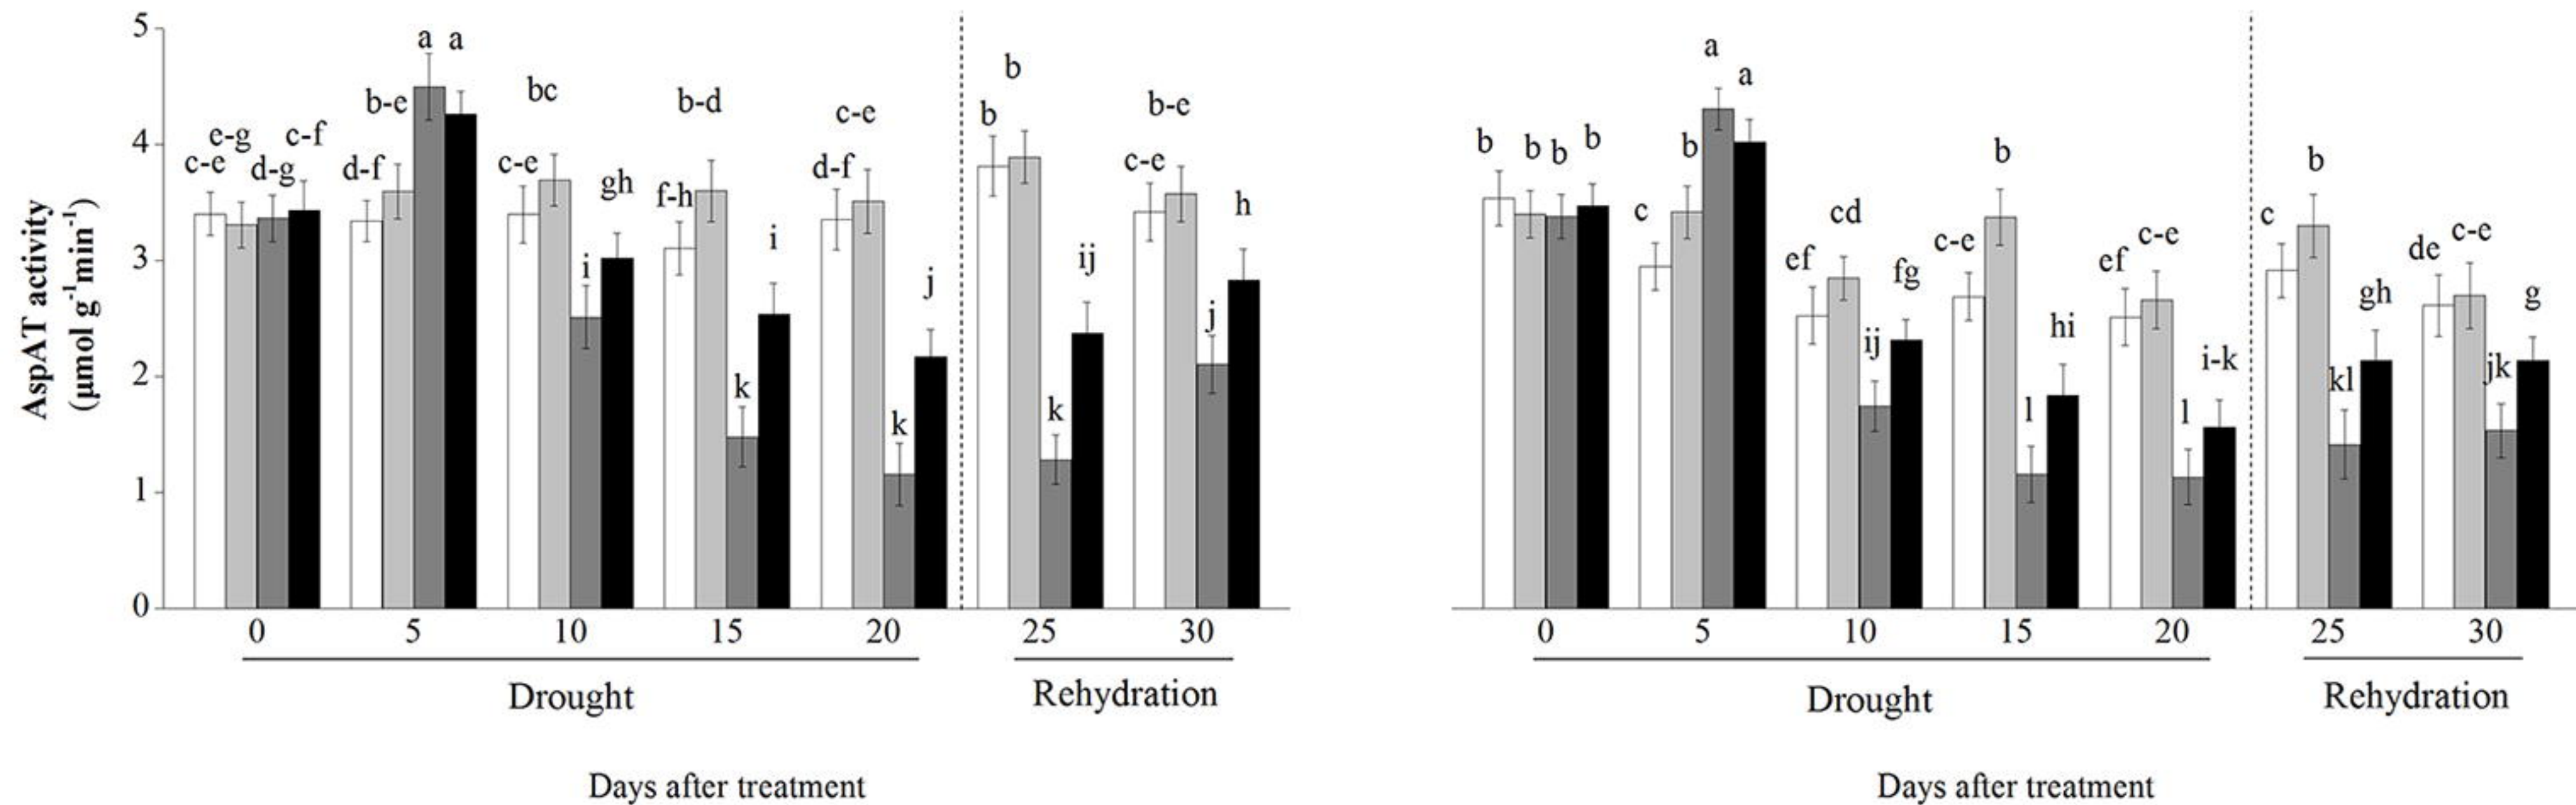

Well-watered Well-watered+DCPTA Drought Drought+DCPTA

2016

2017

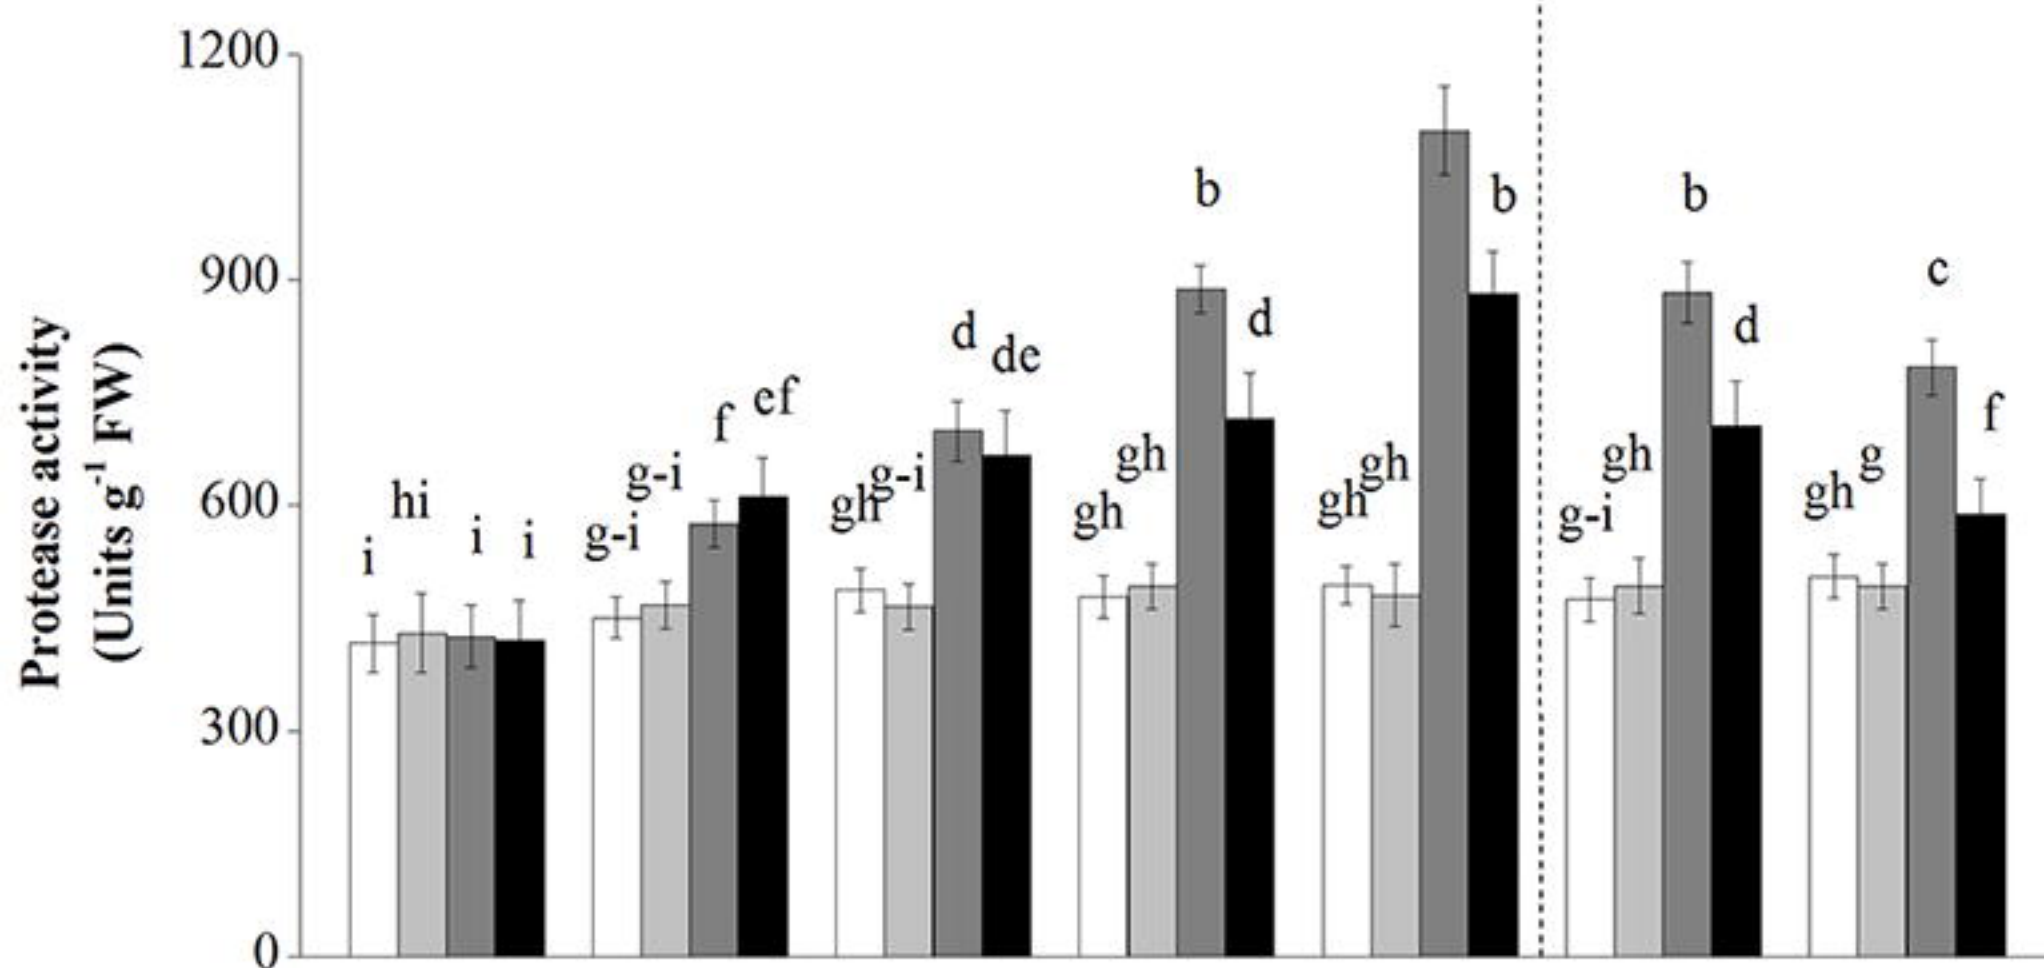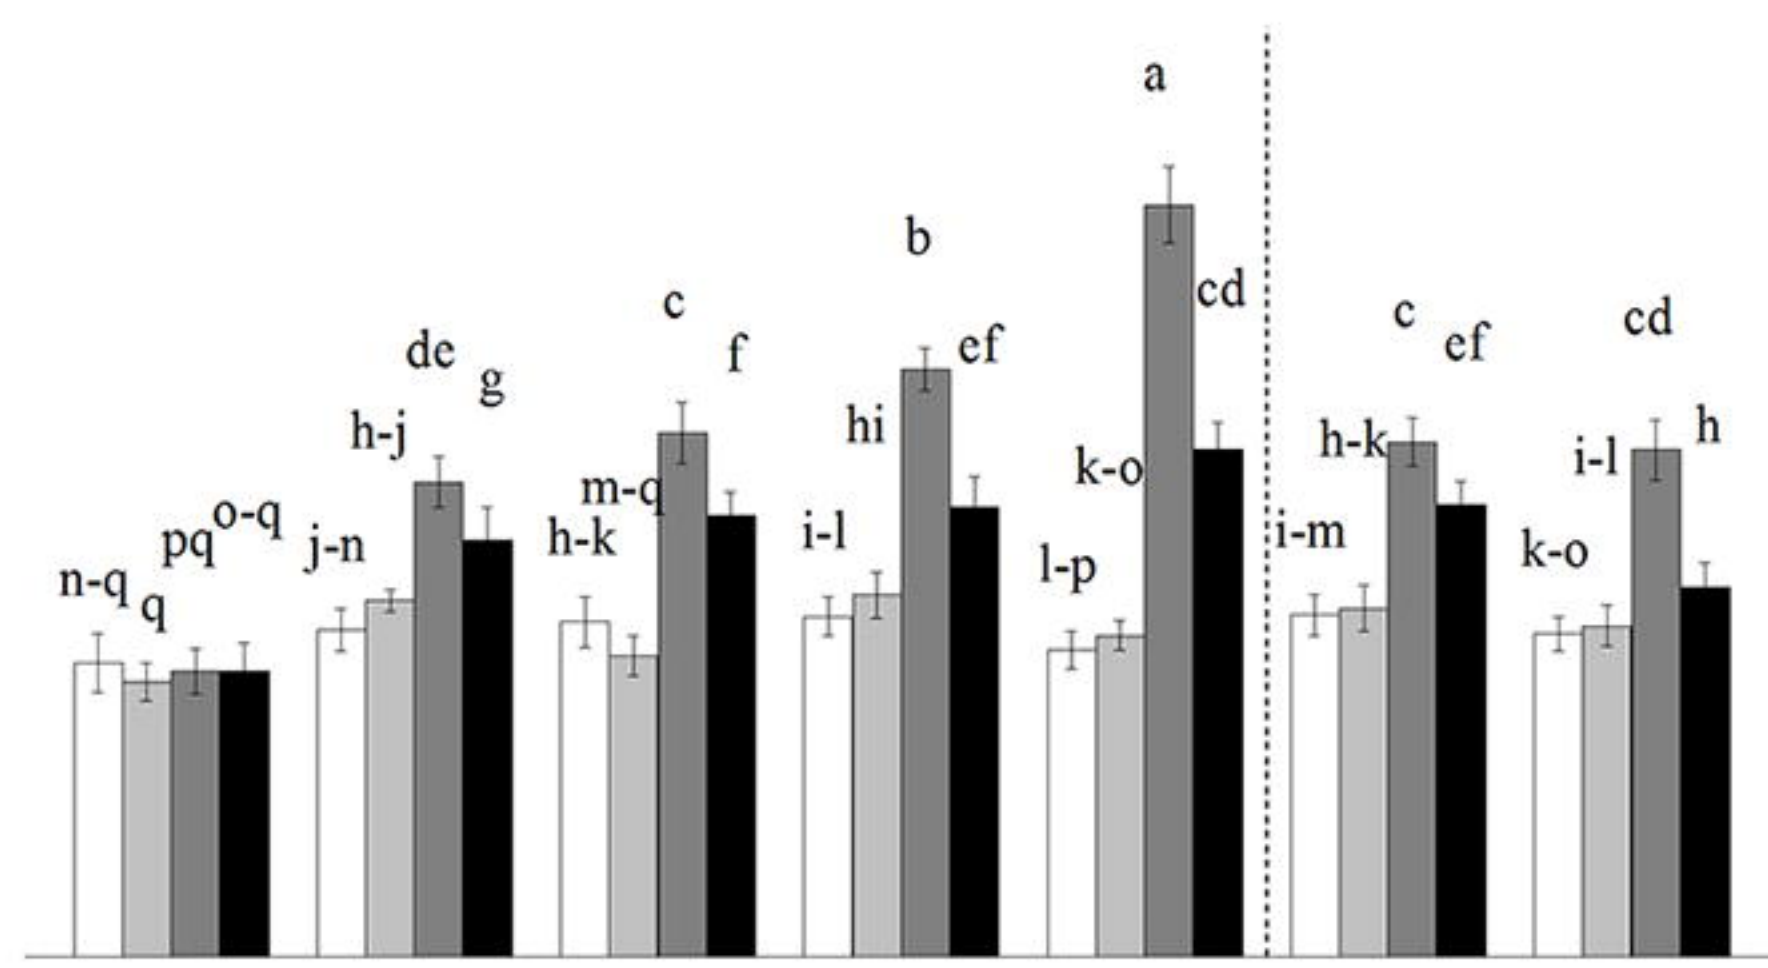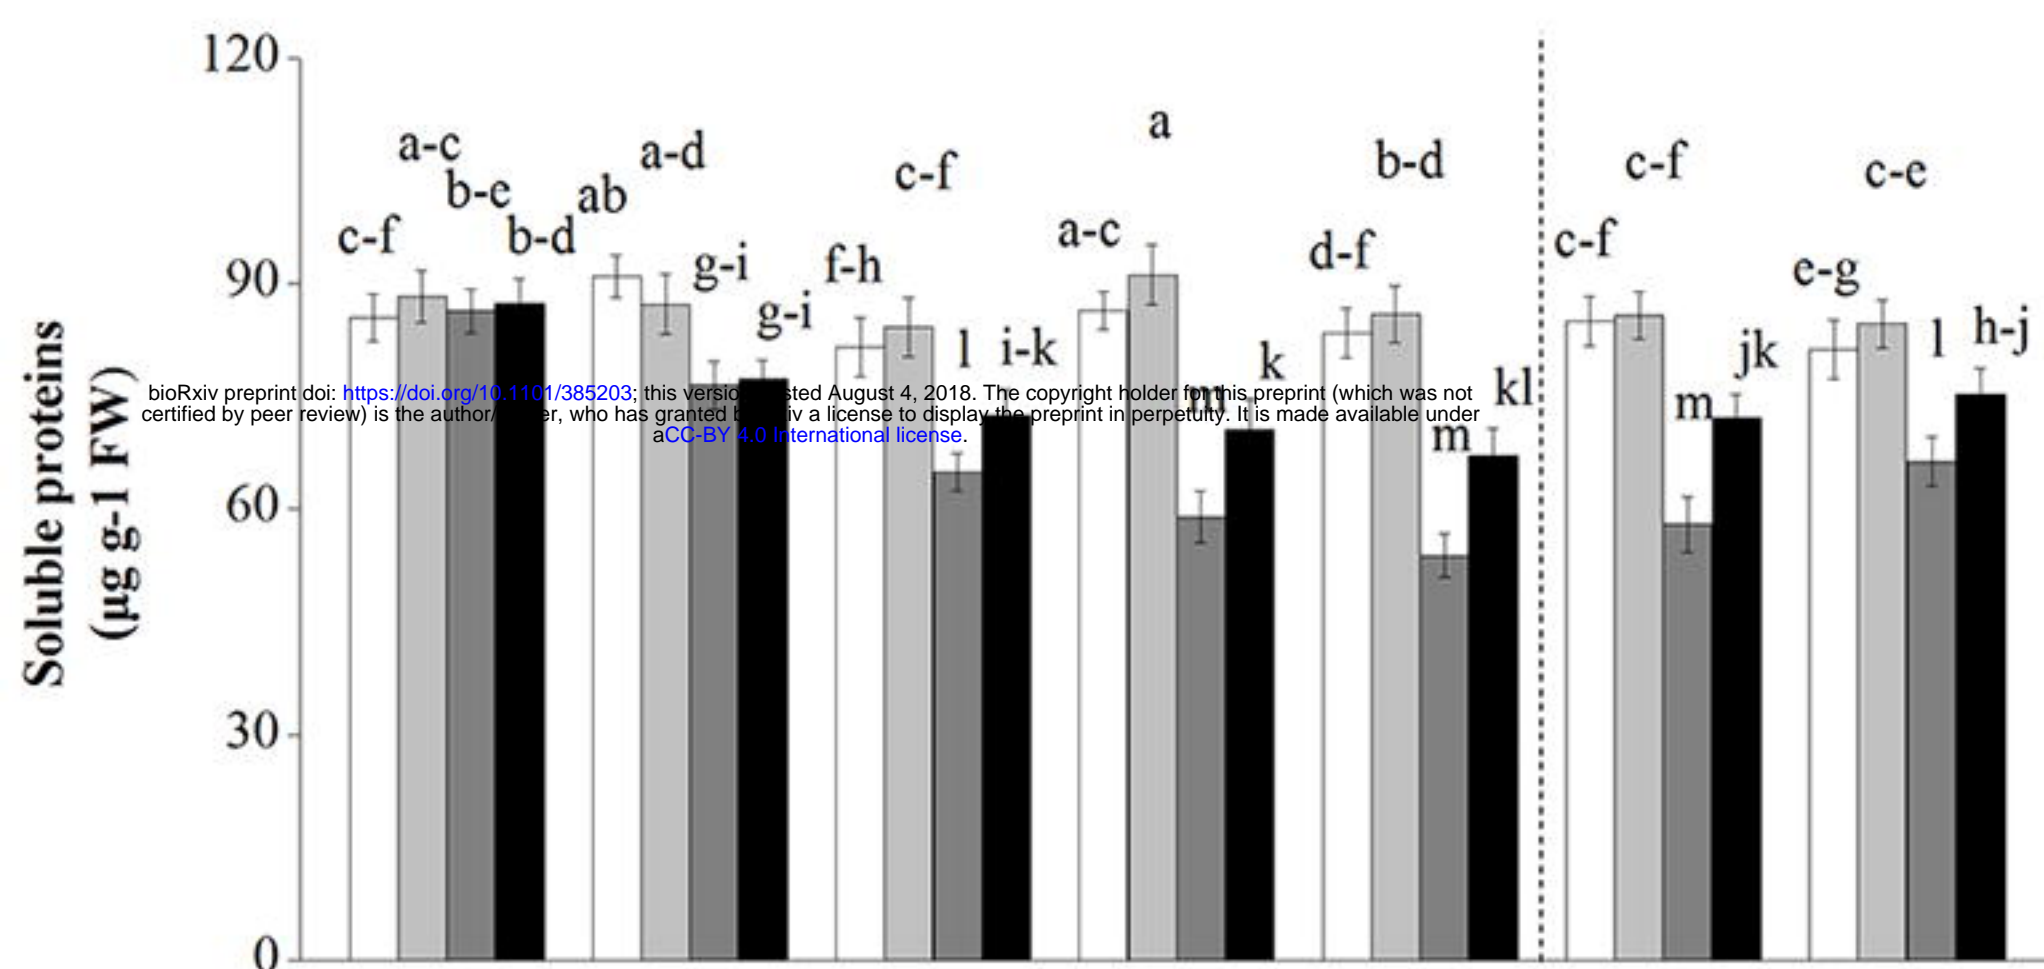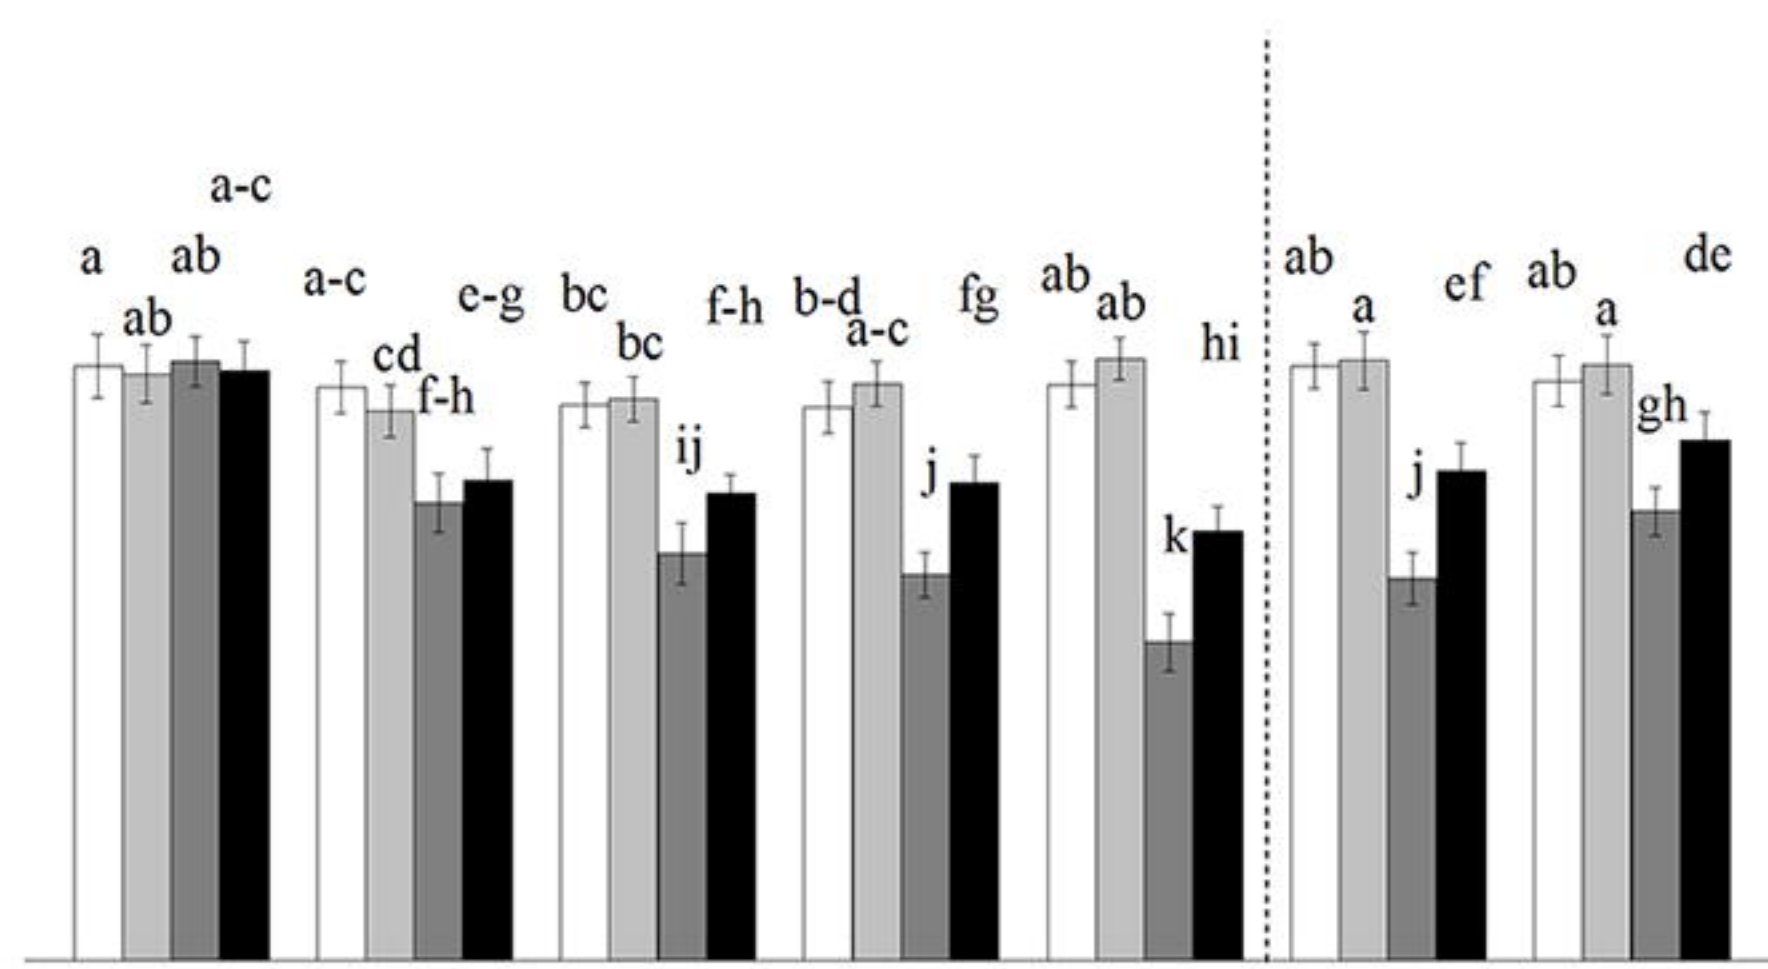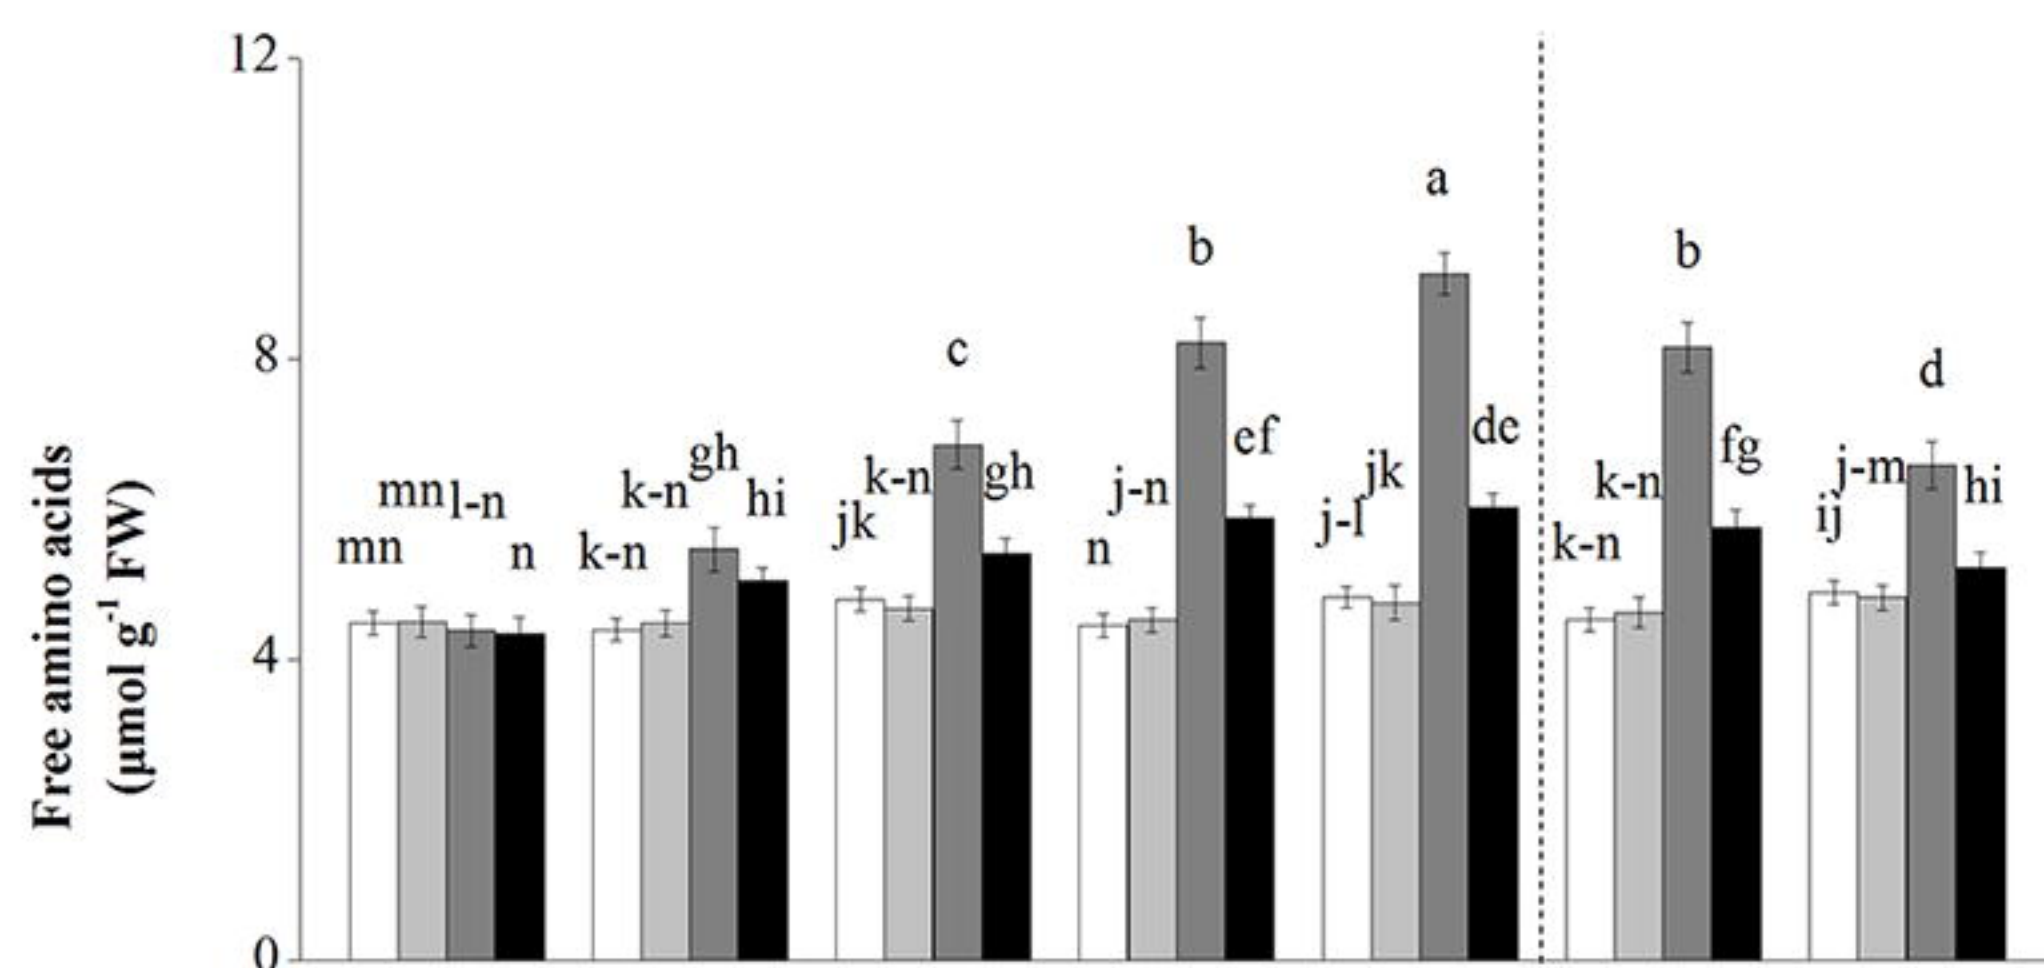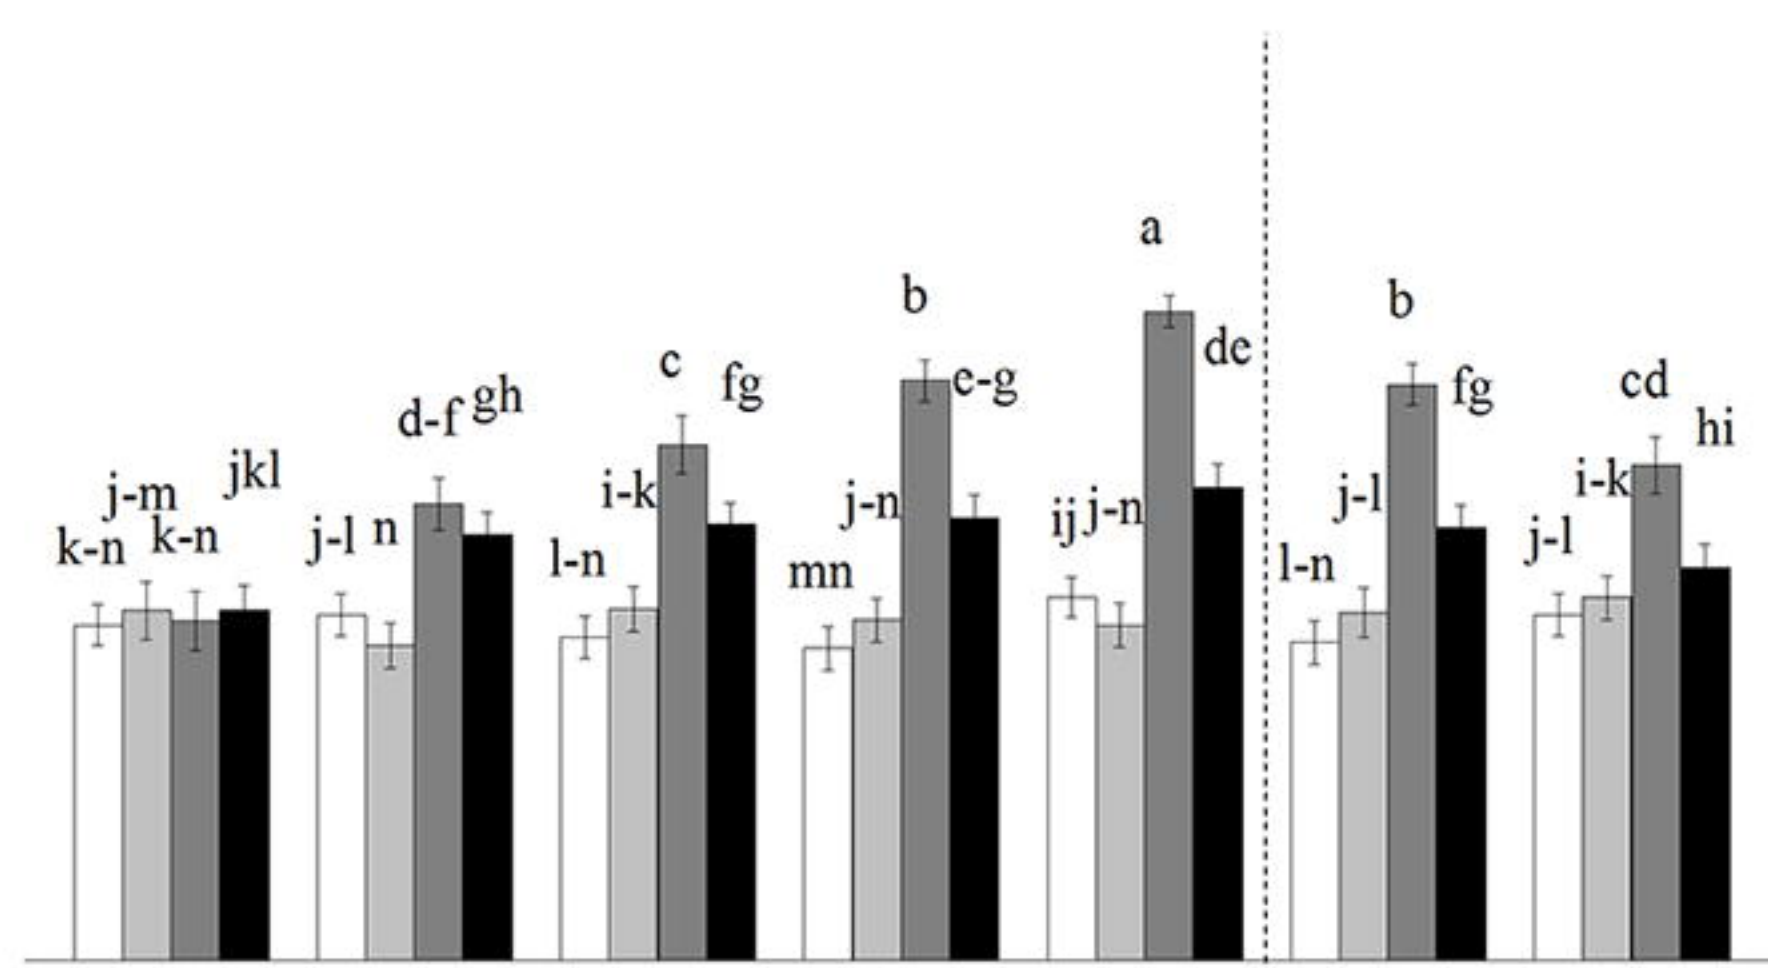

Drought

Rehydration

Days after treatment

Drought

Rehydration

Days after treatment

bioRxiv preprint doi: <https://doi.org/10.1101/385203>; this version posted August 4, 2018. The copyright holder for this preprint (which was not certified by peer review) is the author/funder, who has granted bioRxiv a license to display the preprint in perpetuity. It is made available under aCC-BY 4.0 International license.
